# Supplementary material
Source: PubMed Central journal article supplement (PMC3890746)
Supplement: NIHMS96363-supplement.pdf [file NIHMS96363-supplement.pdf]

**Supporting Information for**

**Structural Analysis of the Mn(IV)/Fe(III) Cofactor of *Chlamydia trachomatis* Ribonucleotide Reductase by EXAFS Spectroscopy and Density Functional Theory Calculations**

Jarod M. Younker, Courtney M. Krest, Wei Jiang, Carsten Krebs, J. Martin Bollinger, Jr., and Michael T. Green

*Department of Chemistry and Department of Biochemistry and Molecular Biology, The Pennsylvania State University, University Park, Pennsylvania 16802*

## Results

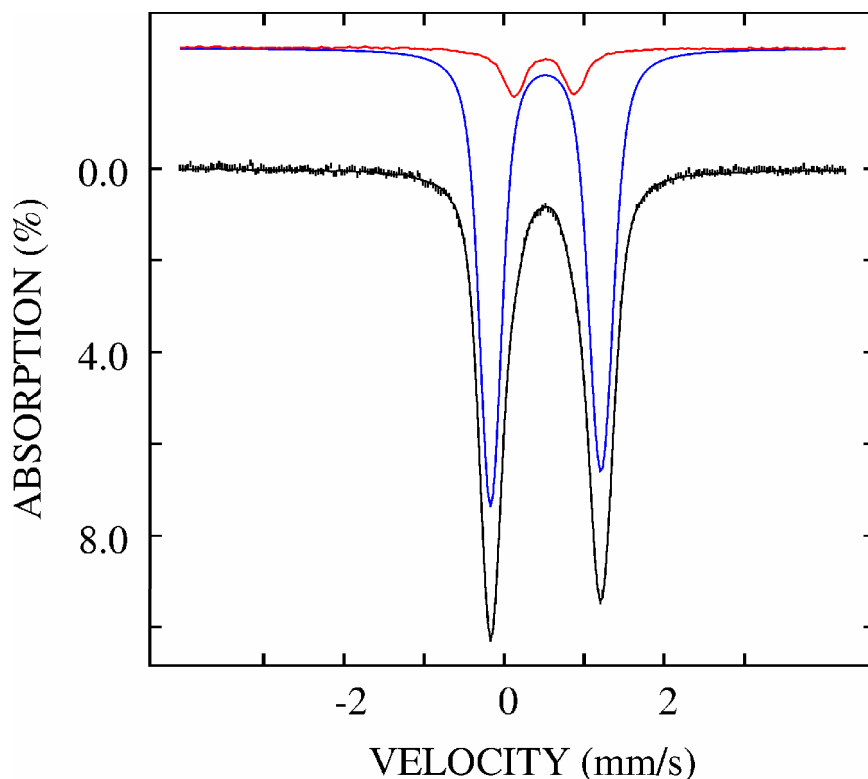

**Figure S1.** 4.2-K/zero-field Mössbauer spectrum of a sample of  $\text{Mn}^{\text{IV}}/\text{Fe}^{\text{III}}$  *C. trachomatis* R2, which was prepared according to the method described in the manuscript. The spectrum is analyzed as a superposition of 10% of the experimental spectrum of  $\text{Fe}_2^{\text{III/III}}$ -R2 (red line) and 90% of a quadrupole doublet assigned to  $\text{Mn}^{\text{IV}}/\text{Fe}^{\text{III}}$ -R2 (blue line). The parameters ( $\delta = 0.52$  mm/s and  $\Delta E_Q = 1.38$  mm/s) are slightly different from those previously reported for  $\text{Mn}^{\text{IV}}/\text{Fe}^{\text{III}}$ -R2 ( $\delta = 0.52$  mm/s and  $\Delta E_Q = 1.32$  mm/s, Jiang et al. *J. Am. Chem. Soc.* **2007**, **129**, 7504-7505). We attribute the difference to the greater glycerol content (45% vs 10%) in the sample characterized here. A second batch of  $\text{Mn}^{\text{IV}}/\text{Fe}^{\text{III}}$ -R2 used for XAS-spectroscopic experiments had a similar composition (15%  $\text{Fe}_2^{\text{III/III}}$ -R2 and 85%  $\text{Mn}^{\text{IV}}/\text{Fe}^{\text{III}}$ -R2, data not shown).

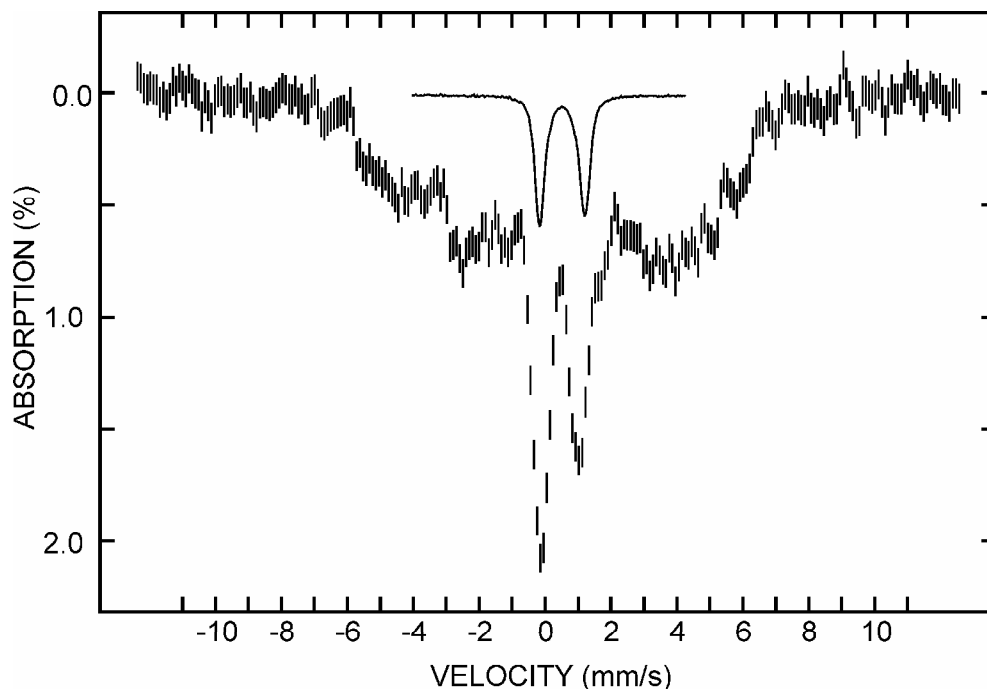

**Figure S2.** Mössbauer spectrum of a sample of  $\text{Mn}^{\text{III}}/\text{Fe}^{\text{III}}$  Ct R2 produced by treatment of the  $\text{Mn}^{\text{IV}}/\text{Fe}^{\text{III}}$  protein with excess dithionite for 2 min at room temperature. The spectrum was collected at 4.2 K without an applied magnetic field. The broad features are due to the hyperfine interaction of the  $^{57}\text{Fe}$  nucleus with the  $S = 1/2$  ground state of the cluster, which arises from antiferromagnetic coupling of its  $\text{Mn}^{\text{III}}$  ( $S_{\text{Mn}} = 2$ ) and  $\text{Fe}^{\text{III}}$  ( $S_{\text{Fe}} = 5/2$ ) constituents. The  $\text{Mn}^{\text{IV}}/\text{Fe}^{\text{III}}$  complex gives rise to a sharp quadrupole doublet under these conditions. We estimate an upper limit of 6% of the total Fe intensity for the  $\text{Mn}^{\text{IV}}/\text{Fe}^{\text{III}}$  complex (solid line).

**Table S1.** Results of fitting Mn *K*-edge EXAFS data for Mn<sup>IV</sup>/Fe<sup>III</sup>-R2. Scale factor  $S_0=0.8$ . Best fits for each coordination number are shown in bold. Fits with negative and unusually large Debye-Waller factors are shown in red and blue, respectively. Fits were performed over the region  $k = 1-11.6 \text{ \AA}^{-1}$ . Number of scatterers  $N$ , inter-atomic distance  $R$  ( $\text{\AA}$ ), mean-square deviation in  $R$ ,  $\sigma^2$  ( $\text{\AA}^2$ ), and the threshold energy shift  $E_0$  (eV) are listed. The fit-error  $F$  is defined as  $(\sum k^6(\chi_{\text{exptl}} - \chi_{\text{calc}})^2 / \sum k^6 \chi_{\text{exptl}}^2)^{1/2}$ .

| $S_0$ | <i>Mn-O</i> |                 |               | <i>Mn-O/N</i> |                 |               | <i>Mn-Fe</i> |                 |               | $E_0$         | $F$           |
|-------|-------------|-----------------|---------------|---------------|-----------------|---------------|--------------|-----------------|---------------|---------------|---------------|
|       | $N$         | $R$             | $\sigma^2$    | $N$           | $R$             | $\sigma^2$    | $N$          | $R$             | $\sigma^2$    |               |               |
| 0.8   | <b>1.00</b> | <b>1.787(7)</b> | <b>0.0043</b> | <b>3.00</b>   | <b>1.959(3)</b> | <b>0.0017</b> | <b>1.00</b>  | <b>2.911(3)</b> | <b>0.0015</b> | <b>-2.893</b> | <b>0.2511</b> |
|       | 2.00        | 1.857(8)        | 0.0104        | 2.00          | 1.959(3)        | 0.0005        | 1.00         | 2.910(3)        | 0.0016        | -3.234        | 0.2546        |
|       | 3.00        | 1.908(8)        | 0.0118        | 1.00          | 1.971(3)        | -0.0021       | 1.00         | 2.912(3)        | 0.0015        | -2.972        | 0.2554        |
|       | 0.00        | -               | -             | 4.00          | 1.961(3)        | 0.0057        | 1.00         | 2.921(3)        | 0.0015        | 0.102         | 0.3174        |
|       | <b>1.00</b> | <b>1.738(6)</b> | <b>0.0033</b> | <b>4.00</b>   | <b>1.945(3)</b> | <b>0.0038</b> | <b>1.00</b>  | <b>2.907(2)</b> | <b>0.0014</b> | <b>-3.829</b> | <b>0.2374</b> |
|       | 2.00        | 1.801(6)        | 0.0103        | 3.00          | 1.960(2)        | 0.0022        | 1.00         | 2.905(3)        | 0.0015        | -4.405        | 0.2409        |
|       | 3.00        | 1.853(7)        | 0.0154        | 2.00          | 1.964(3)        | 0.0007        | 1.00         | 2.905(3)        | 0.0015        | -4.428        | 0.2410        |
|       | 4.00        | 1.904(7)        | 0.0159        | 1.00          | 1.966(3)        | -0.0022       | 1.00         | 2.909(3)        | 0.0015        | -3.646        | 0.2411        |
|       | 0.00        | -               | -             | 5.00          | 1.956(4)        | 0.0081        | 1.00         | 2.916(3)        | 0.0014        | -0.702        | 0.3628        |
|       | <b>1.00</b> | <b>1.708(5)</b> | <b>0.0025</b> | <b>5.00</b>   | <b>1.935(3)</b> | <b>0.0060</b> | <b>1.00</b>  | <b>2.904(2)</b> | <b>0.0013</b> | <b>-4.485</b> | <b>0.2463</b> |
|       | 2.00        | 1.756(5)        | 0.0091        | 4.00          | 1.951(2)        | 0.0037        | 1.00         | 2.901(2)        | 0.0015        | -5.173        | 0.2440        |
|       | 3.00        | 1.800(3)        | 0.0152        | 3.00          | 1.957(2)        | 0.0025        | 1.00         | 2.899(3)        | 0.0015        | -5.664        | 0.2437        |
|       | 4.00        | 1.848(7)        | 0.0200        | 2.00          | 1.959(2)        | 0.0084        | 1.00         | 2.901(3)        | 0.0015        | -5.232        | 0.2411        |
|       | 5.00        | 1.899(7)        | 0.0197        | 1.00          | 1.962(2)        | -0.0023       | 1.00         | 2.907(3)        | 0.0014        | -4.366        | 0.2419        |
|       | 0.00        | -               | -             | 6.00          | 1.951(4)        | 0.0106        | 1.00         | 2.911(4)        | 0.0014        | -1.575        | 0.4163        |
|       | 1.00        | 1.688(4)        | 0.0018        | 6.00          | 1.927(3)        | 0.0081        | 1.00         | 2.901(3)        | 0.0012        | -5.123        | 0.2733        |
|       | <b>2.00</b> | <b>1.727(5)</b> | <b>0.0079</b> | <b>5.00</b>   | <b>1.941(3)</b> | <b>0.0053</b> | <b>1.00</b>  | <b>2.898(2)</b> | <b>0.0014</b> | <b>-5.919</b> | <b>0.2624</b> |
|       | 3.00        | 1.762(6)        | 0.0139        | 4.00          | 1.950(2)        | 0.0040        | 1.00         | 2.895(2)        | 0.0015        | -6.440        | 0.2577        |
|       | 4.00        | 1.797(6)        | 0.0197        | 3.00          | 1.954(2)        | 0.0028        | 1.00         | 2.895(3)        | 0.0015        | -6.602        | 0.2539        |
|       | 5.00        | 1.842(7)        | 0.0243        | 2.00          | 1.956(2)        | 0.0009        | 1.00         | 2.898(3)        | 0.0027        | -5.969        | 0.2491        |
| 6.00  | 1.891(7)    | 0.0231          | 1.00          | 1.959(2)      | -0.0023         | 1.00          | 2.904(3)     | 0.0014          | -5.110        | 0.2520        |               |
| 0.00  | -           | -               | 7.00          | 1.951(4)      | 0.0106          | 1.00          | 2.912(4)     | 0.0014          | -1.470        | 0.4164        |               |
| range |             | 1.71-1.79       |               | 1.94-1.96     |                 |               | 2.90-2.91    |                 |               |               |               |
| best  | 1.00        | 1.738(6)        | 0.0033        | 4.00          | 1.945(3)        | 0.0038        | 1.00         | 2.907(2)        | 0.0014        | -3.829        | 0.2374        |

**Table S2.** Results of fitting Mn *K*-edge EXAFS data for Mn<sup>IV</sup>/Fe<sup>III</sup>-R2. Scale factor  $S_0=0.9$ . Best fits for each coordination number are shown in bold. Fits with negative and unusually large Debye-Waller factors are shown in red and blue, respectively. Fits were performed over the region  $k = 1-11.6 \text{ \AA}^{-1}$ . Number of scatterers  $N$ , inter-atomic distance  $R$  ( $\text{\AA}$ ), mean-square deviation in  $R$ ,  $\sigma^2$  ( $\text{\AA}^2$ ), and the threshold energy shift  $E_0$  (eV) are listed. The fit-error  $F$  is defined as  $(\sum k^6(\chi_{\text{exptl}} - \chi_{\text{calc}})^2 / \sum k^6 \chi_{\text{exptl}}^2)^{1/2}$ .

| $S_0$ | <i>Mn-O</i> |                 |               | <i>Mn-O/N</i> |                 |               | <i>Mn-Fe</i> |                 |               | $E_0$         | $F$           |
|-------|-------------|-----------------|---------------|---------------|-----------------|---------------|--------------|-----------------|---------------|---------------|---------------|
|       | $N$         | $R$             | $\sigma^2$    | $N$           | $R$             | $\sigma^2$    | $N$          | $R$             | $\sigma^2$    |               |               |
| 0.9   | <b>1.00</b> | <b>1.698(4)</b> | <b>0.0028</b> | <b>5.00</b>   | <b>1.931(3)</b> | <b>0.0071</b> | <b>1.00</b>  | <b>2.902(2)</b> | <b>0.0019</b> | <b>-5.058</b> | <b>0.2635</b> |
|       | 2.00        | 1.745(5)        | 0.0097        | 4.00          | 1.947(3)        | 0.0045        | 1.00         | 2.898(2)        | 0.0021        | -5.804        | 0.2551        |
|       | 3.00        | 1.785(6)        | 0.0164        | 3.00          | 1.954(2)        | 0.0032        | 1.00         | 2.896(3)        | 0.0021        | -6.284        | 0.2515        |
|       | 4.00        | 1.832(7)        | 0.0224        | 2.00          | 1.957(2)        | 0.0015        | 1.00         | 2.898(3)        | 0.0021        | -5.940        | 0.2470        |
|       | 5.00        | 1.887(7)        | 0.0230        | 1.00          | 1.960(2)        | -0.0018       | 1.00         | 2.904(3)        | 0.0020        | -4.968        | 0.2470        |
|       | 0.00        | -               | -             | 6.00          | 1.946(5)        | 0.0126        | 1.00         | 2.908(4)        | 0.0020        | -2.190        | 0.4537        |
|       | <b>1.00</b> | <b>1.726(5)</b> | <b>0.0037</b> | <b>4.00</b>   | <b>1.941(3)</b> | <b>0.0047</b> | <b>1.00</b>  | <b>2.905(2)</b> | <b>0.0020</b> | <b>-4.337</b> | <b>0.2400</b> |
|       | 2.00        | 1.786(6)        | 0.0112        | 3.00          | 1.957(2)        | 0.0028        | 1.00         | 2.902(2)        | 0.0021        | -4.956        | 0.2406        |
|       | 3.00        | 1.837(7)        | 0.0173        | 2.00          | 1.961(2)        | 0.0013        | 1.00         | 2.902(3)        | 0.0021        | -5.074        | 0.2396        |
|       | 4.00        | 1.895(7)        | 0.0185        | 1.00          | 1.964(2)        | -0.0017       | 1.00         | 2.907(3)        | 0.0021        | -4.158        | 0.2391        |
| 0.00  | -           | -               | 5.00          | 1.953(4)      | 0.0097          | 1.00          | 2.914(3)     | 0.0020          | -1.198        | 0.3954        |               |
|       | <b>1.00</b> | <b>1.773(7)</b> | <b>0.0049</b> | <b>3.00</b>   | <b>1.956(3)</b> | <b>0.0025</b> | <b>1.00</b>  | <b>2.909(3)</b> | <b>0.0022</b> | <b>-3.347</b> | <b>0.2414</b> |
|       | 2.00        | 1.845(7)        | 0.0123        | 2.00          | 1.967(3)        | 0.0011        | 1.00         | 2.908(3)        | 0.0022        | -3.619        | 0.2449        |
|       | 3.00        | 1.899(7)        | 0.0140        | 1.00          | 1.968(3)        | -0.0017       | 1.00         | 2.910(3)        | 0.0021        | -3.459        | 0.2449        |
|       | 0.00        | -               | -             | 4.00          | 1.959(3)        | 0.0069        | 1.00         | 2.919(3)        | 0.0021        | -0.257        | 0.3371        |
|       | 1.00        | 1.680(4)        | 0.0023        | 6.00          | 1.923(3)        | 0.0093        | 1.00         | 2.898(3)        | 0.0018        | -5.745        | 0.3131        |
|       | <b>2.00</b> | <b>1.715(5)</b> | <b>0.0085</b> | <b>5.00</b>   | <b>1.937(3)</b> | <b>0.0062</b> | <b>1.00</b>  | <b>2.894(3)</b> | <b>0.0020</b> | <b>-6.555</b> | <b>0.2840</b> |
|       | 3.00        | 1.749(5)        | 0.0148        | 4.00          | 1.947(3)        | 0.0048        | 1.00         | 2.892(3)        | 0.0026        | -7.055        | 0.2745        |
|       | 4.00        | 1.781(6)        | 0.0213        | 3.00          | 1.951(2)        | 0.0035        | 1.00         | 2.892(3)        | 0.0021        | -7.277        | 0.2677        |
|       | 5.00        | 1.826(7)        | 0.0273        | 2.00          | 1.953(2)        | 0.0016        | 1.00         | 2.895(3)        | 0.0020        | -6.606        | 0.2602        |
|       | 6.00        | 1.880(7)        | 0.0265        | 1.00          | 1.956(2)        | -0.0018       | 1.00         | 2.901(3)        | 0.0020        | -5.679        | 0.2626        |
| 0.00  | -           | -               | 7.00          | 1.936(7)      | 0.0161          | 1.00          | 2.903(5)     | 0.0020          | -3.356        | 0.5035        |               |
| range |             | 1.70-1.77       |               |               | 1.93-1.96       |               |              | 2.89-2.91       |               |               |               |
| best  | 1.00        | 1.726(5)        | 0.0037        | 4.00          | 1.941(3)        | 0.0047        | 1.00         | 2.905(2)        | 0.0020        | -4.337        | 0.2400        |

**Table S3.** Results of fitting Mn *K*-edge EXAFS data for Mn<sup>IV</sup>/Fe<sup>III</sup>-R2. Scale factor  $S_0=1.0$ . Best fits for each coordination number are shown in bold. Fits with negative and unusually large Debye-Waller factors are shown in red and blue, respectively. Fits were performed over the region  $k = 1-11.6 \text{ \AA}^{-1}$ . Number of scatterers  $N$ , inter-atomic distance  $R$  ( $\text{\AA}$ ), mean-square deviation in  $R$ ,  $\sigma^2$  ( $\text{\AA}^2$ ), and the threshold energy shift  $E_0$  (eV) are listed. The fit-error  $F$  is defined as  $(\sum k^6(\chi_{\text{exptl}} - \chi_{\text{calc}})^2 / \sum k^6 \chi_{\text{exptl}}^2)^{1/2}$ .

| $S_0$ | <i>Mn-O</i> |                 |               | <i>Mn-O/N</i> |                 |               | <i>Mn-Fe</i> |                 |               | $E_0$         | $F$           |
|-------|-------------|-----------------|---------------|---------------|-----------------|---------------|--------------|-----------------|---------------|---------------|---------------|
|       | $N$         | $R$             | $\sigma^2$    | $N$           | $R$             | $\sigma^2$    | $N$          | $R$             | $\sigma^2$    |               |               |
| 1.0   | <b>1.00</b> | <b>1.690(4)</b> | <b>0.0032</b> | <b>5.00</b>   | <b>1.928(3)</b> | <b>0.0081</b> | <b>1.00</b>  | <b>2.899(3)</b> | <b>0.0025</b> | <b>-5.552</b> | <b>0.2874</b> |
|       | 2.00        | 1.733(5)        | 0.0100        | 4.00          | 1.943(3)        | 0.0053        | 1.00         | 2.895(3)        | 0.0026        | -6.400        | 0.2720        |
|       | 3.00        | 1.771(6)        | 0.0177        | 3.00          | 1.951(2)        | 0.0039        | 1.00         | 2.893(3)        | 0.0027        | -6.865        | 0.2648        |
|       | 4.00        | 1.817(7)        | 0.0245        | 2.00          | 1.954(2)        | 0.0020        | 1.00         | 2.895(3)        | 0.0026        | -6.566        | 0.2577        |
|       | 5.00        | 1.878(7)        | 0.0256        | 1.00          | 1.958(2)        | -0.0013       | 1.00         | 2.901(3)        | 0.0026        | -5.501        | 0.2568        |
|       | 0.00        | -               | -             | 6.00          | 1.940(6)        | 0.0150        | 1.00         | 2.905(4)        | 0.0026        | -2.931        | 0.4880        |
|       | <b>1.00</b> | <b>1.716(5)</b> | <b>0.0040</b> | <b>4.00</b>   | <b>1.937(3)</b> | <b>0.0056</b> | <b>1.00</b>  | <b>2.903(2)</b> | <b>0.0026</b> | <b>-4.824</b> | <b>0.2508</b> |
|       | 2.00        | 1.773(6)        | 0.0120        | 3.00          | 1.954(2)        | 0.0035        | 1.00         | 2.900(2)        | 0.0027        | -5.450        | 0.2470        |
|       | 3.00        | 1.823(6)        | 0.0189        | 2.00          | 1.959(2)        | 0.0019        | 1.00         | 2.899(3)        | 0.0027        | -5.696        | 0.2442        |
|       | 4.00        | 1.886(7)        | 0.0211        | 1.00          | 1.962(2)        | -0.0013       | 1.00         | 2.904(3)        | 0.0027        | -4.680        | 0.2426        |
|       | 0.00        | -               | -             | 5.00          | 1.949(5)        | 0.0113        | 1.00         | 2.911(4)        | 0.0026        | -1.739        | 0.4286        |
|       | <b>1.00</b> | <b>1.758(6)</b> | <b>0.0053</b> | <b>3.00</b>   | <b>1.951(3)</b> | <b>0.0032</b> | <b>1.00</b>  | <b>2.907(2)</b> | <b>0.0027</b> | <b>-3.892</b> | <b>0.2387</b> |
|       | 2.00        | 1.829(7)        | 0.0132        | 2.00          | 1.964(2)        | 0.0016        | 1.00         | 2.905(3)        | 0.0028        | -4.250        | 0.2411        |
|       | 3.00        | 1.893(7)        | 0.0161        | 1.00          | 1.967(3)        | -0.0012       | 1.00         | 2.908(3)        | 0.0027        | -3.793        | 0.2406        |
|       | 0.00        | -               | -             | 4.00          | 1.957(4)        | 0.0081        | 1.00         | 2.917(3)        | 0.0026        | -0.634        | 0.3623        |
|       | 1.00        | 1.673(4)        | 0.0028        | 6.00          | 1.920(4)        | 0.0105        | 1.00         | 2.895(3)        | 0.0024        | -6.316        | 0.3367        |
|       | <b>2.00</b> | <b>1.705(5)</b> | <b>0.0090</b> | <b>5.00</b>   | <b>1.933(3)</b> | <b>0.0071</b> | <b>1.00</b>  | <b>2.891(3)</b> | <b>0.0025</b> | <b>-7.159</b> | <b>0.3101</b> |
|       | 3.00        | 1.736(6)        | 0.0157        | 4.00          | 1.944(2)        | 0.0055        | 1.00         | 2.889(3)        | 0.0026        | -7.676        | 0.2956        |
|       | 4.00        | 1.767(6)        | 0.0228        | 3.00          | 1.948(2)        | 0.0042        | 1.00         | 2.889(3)        | 0.0026        | -7.888        | 0.2852        |
|       | 5.00        | 1.811(8)        | 0.0300        | 2.00          | 1.950(2)        | 0.0022        | 1.00         | 2.892(3)        | 0.0026        | -7.229        | 0.2747        |
| 6.00  | 1.870(8)    | 0.0299          | 1.00          | 1.954(2)      | -0.0013         | 1.00          | 2.898(3)     | 0.0026          | -6.197        | 0.2759        |               |
| 0.00  | -           | -               | 7.00          | 1.927(8)      | 0.0189          | 1.00          | 2.899(5)     | 0.0025          | -4.329        | 0.5358        |               |
| range |             | 1.69-1.76       |               |               | 1.93-1.95       |               |              | 2.89-2.91       |               |               |               |
| best  | 1.00        | 1.758(6)        | 0.0053        | 3.00          | 1.951(3)        | 0.0032        | 1.00         | 2.907(2)        | 0.0027        | -3.892        | 0.2387        |

**Table S4.** Results of fitting Fe *K*-edge EXAFS data for Mn<sup>IV</sup>/Fe<sup>III</sup>-R2. Scale factor  $S_0=0.8$ . Best fits for each coordination number are shown in bold. Fits with negative and unusually large Debye-Waller factors are shown in red and blue, respectively. Fits were performed over the region  $k = 1-11.6 \text{ \AA}^{-1}$ . Number of scatterers  $N$ , inter-atomic distance  $R$  ( $\text{\AA}$ ), mean-square deviation in  $R$ ,  $\sigma^2$  ( $\text{\AA}^2$ ), and the threshold energy shift  $E_0$  (eV) are listed. The fit-error  $F$  is defined as  $(\sum k^6(\chi_{\text{exptl}} - \chi_{\text{calc}})^2 / \sum k^6 \chi_{\text{exptl}}^2)^{1/2}$ .

| $S_0$       | <i>Fe-O</i>     |                 |               | <i>Fe-O/N</i>   |                 |               | <i>Fe-Mn</i>    |                 |               | $E_0$         | $F$           |
|-------------|-----------------|-----------------|---------------|-----------------|-----------------|---------------|-----------------|-----------------|---------------|---------------|---------------|
|             | $N$             | $R$             | $\sigma^2$    | $N$             | $R$             | $\sigma^2$    | $N$             | $R$             | $\sigma^2$    |               |               |
| 0.8         | 1.00            | 1.912(5)        | -0.0039       | 3.00            | 2.059(5)        | 0.0005        | 1.00            | 2.930(5)        | 0.0034        | -2.057        | 0.3526        |
|             | 2.00            | 1.945(5)        | -0.0018       | 2.00            | 2.093(5)        | -0.0025       | 1.00            | 2.926(6)        | 0.0032        | -2.792        | 0.3548        |
|             | 3.00            | 1.976(5)        | 0.0010        | 1.00            | 2.124(5)        | -0.0047       | 1.00            | 2.923(5)        | 0.0030        | -3.410        | 0.3515        |
|             | <b>0.00</b>     | -               | -             | <b>4.00</b>     | <b>2.015(5)</b> | <b>0.0075</b> | <b>1.00</b>     | <b>2.939(7)</b> | <b>0.0043</b> | <b>-1.520</b> | <b>0.4031</b> |
|             | 1.00            | 1.903(4)        | -0.0024       | 4.00            | 2.051(4)        | 0.0033        | 1.00            | 2.931(4)        | 0.0035        | -2.193        | 0.2952        |
|             | 2.00            | 1.930(4)        | -0.0007       | 3.00            | 2.080(4)        | 0.0004        | 1.00            | 2.927(4)        | 0.0033        | -2.725        | 0.2963        |
|             | 3.00            | 1.956(4)        | 0.0012        | 2.00            | 2.106(4)        | -0.0015       | 1.00            | 2.924(4)        | 0.0032        | -3.289        | 0.2952        |
|             | 4.00            | 1.979(4)        | 0.0037        | 1.00            | 2.128(5)        | -0.0035       | 1.00            | 2.921(4)        | 0.0031        | -3.900        | 0.2915        |
|             | <b>0.00</b>     | -               | -             | <b>5.00</b>     | <b>2.012(4)</b> | <b>0.0092</b> | <b>1.00</b>     | <b>2.936(5)</b> | <b>0.0042</b> | <b>-2.048</b> | <b>0.3401</b> |
|             | 1.00            | 1.894(5)        | -0.0009       | 5.00            | 2.043(4)        | 0.0058        | 1.00            | 2.930(4)        | 0.0036        | -2.621        | 0.2628        |
|             | 2.00            | 1.917(4)        | 0.0007        | 4.00            | 2.067(4)        | 0.0031        | 1.00            | 2.927(4)        | 0.0035        | -3.097        | 0.2612        |
|             | <b>3.00</b>     | <b>1.941(4)</b> | <b>0.0020</b> | <b>3.00</b>     | <b>2.091(4)</b> | <b>0.0012</b> | <b>1.00</b>     | <b>2.925(4)</b> | <b>0.0034</b> | <b>-3.402</b> | <b>0.2596</b> |
|             | 4.00            | 1.962(4)        | 0.0038        | 2.00            | 2.112(4)        | -0.0003       | 1.00            | 2.923(4)        | 0.0033        | -3.861        | 0.2570        |
|             | 5.00            | 1.979(3)        | 0.0060        | 1.00            | 2.129(4)        | -0.0024       | 1.00            | 2.919(4)        | 0.0032        | -4.456        | 0.2541        |
|             | 0.00            | -               | -             | 6.00            | 2.009(4)        | 0.0108        | 1.00            | 2.933(5)        | 0.0041        | -2.638        | 0.2990        |
| 1.00        | 1.885(6)        | 0.0008          | 6.00          | 2.034(4)        | 0.0081          | 1.00          | 2.927(4)        | 0.0038          | -3.227        | 0.2542        |               |
| 2.00        | 1.906(4)        | 0.0024          | 5.00          | 2.055(4)        | 0.0058          | 1.00          | 2.925(4)        | 0.0037          | -3.533        | 0.2494        |               |
| 3.00        | 1.927(4)        | 0.0034          | 4.00          | 2.077(4)        | 0.0039          | 1.00          | 2.924(4)        | 0.0036          | -3.741        | 0.2459        |               |
| 4.00        | 1.947(4)        | 0.0046          | 3.00          | 2.097(4)        | 0.0024          | 1.00          | 2.923(4)        | 0.0035          | -4.020        | 0.2432        |               |
| <b>5.00</b> | <b>1.964(3)</b> | <b>0.0062</b>   | <b>2.00</b>   | <b>2.114(4)</b> | <b>0.0011</b>   | <b>1.00</b>   | <b>2.921(4)</b> | <b>0.0034</b>   | <b>-4.419</b> | <b>0.2406</b> |               |
| 6.00        | 1.979(3)        | 0.0082          | 1.00          | 2.129(4)        | -0.0012         | 1.00          | 2.918(4)        | 0.0033          | -4.936        | 0.2386        |               |
| 0.00        | -               | -               | 7.00          | 2.005(4)        | 0.0124          | 1.00          | 2.929(4)        | 0.0040          | -3.256        | 0.2800        |               |
| range       |                 | 1.94-1.96       |               | 2.01-2.11       |                 |               | 2.92-2.94       |                 |               |               |               |
| best        | <b>5.00</b>     | <b>1.964(3)</b> | <b>0.0062</b> | <b>2.00</b>     | <b>2.114(4)</b> | <b>0.0011</b> | <b>1.00</b>     | <b>2.921(4)</b> | <b>0.0034</b> | <b>-4.419</b> | <b>0.2406</b> |

**Table S5.** Results of fitting Fe *K*-edge EXAFS data for Mn<sup>IV</sup>/Fe<sup>III</sup>-R2. Scale factor  $S_0=0.9$ . Best fits for each coordination number are shown in bold. Fits with negative and unusually large Debye-Waller factors are shown in red and blue, respectively. Fits were performed over the region  $k = 1-11.6 \text{ \AA}^{-1}$ . Number of scatterers  $N$ , inter-atomic distance  $R$  ( $\text{\AA}$ ), mean-square deviation in  $R$ ,  $\sigma^2$  ( $\text{\AA}^2$ ), and the threshold energy shift  $E_0$  (eV) are listed. The fit-error  $F$  is defined as  $(\sum k^6(\chi_{\text{exptl}} - \chi_{\text{calc}})^2 / \sum k^6 \chi_{\text{exptl}}^2)^{1/2}$ .

| $S_0$       | <i>Fe-O</i>     |                 |               | <i>Fe-O/N</i>   |                 |               | <i>Fe-Mn</i>    |                 |               | $E_0$         | $F$           |
|-------------|-----------------|-----------------|---------------|-----------------|-----------------|---------------|-----------------|-----------------|---------------|---------------|---------------|
|             | $N$             | $R$             | $\sigma^2$    | $N$             | $R$             | $\sigma^2$    | $N$             | $R$             | $\sigma^2$    |               |               |
| 0.9         | 1.00            | 1.910(5)        | -0.0028       | 3.00            | 2.058(4)        | 0.0015        | 1.00            | 2.930(5)        | 0.0041        | -2.235        | 0.3179        |
|             | 2.00            | 1.944(4)        | -0.0007       | 2.00            | 2.093(4)        | -0.0014       | 1.00            | 2.926(5)        | 0.0039        | -2.933        | 0.3198        |
|             | 3.00            | 1.975(4)        | 0.0021        | 1               | 2.123(5)        | -0.0037       | 1.00            | 2.923(5)        | 0.0038        | -3.570        | 0.3166        |
|             | <b>0.00</b>     | -               | -             | <b>4.00</b>     | <b>2.014(5)</b> | <b>0.0084</b> | <b>1.00</b>     | <b>2.938(6)</b> | <b>0.0049</b> | <b>-1.747</b> | <b>0.3647</b> |
|             | 1.00            | 1.900(4)        | -0.0011       | 4.00            | 2.049(4)        | 0.0049        | 1.00            | 2.930(4)        | 0.0042        | -2.532        | 0.2675        |
|             | <b>2.00</b>     | <b>1.928(4)</b> | <b>0.0005</b> | <b>3.00</b>     | <b>2.078(4)</b> | <b>0.0016</b> | <b>1.00</b>     | <b>2.927(4)</b> | <b>0.0041</b> | <b>-2.996</b> | <b>0.2672</b> |
|             | 3.00            | 1.954(4)        | 0.0024        | 2.00            | 2.104(4)        | -0.0003       | 1.00            | 2.924(4)        | 0.0040        | -3.533        | 0.2656        |
|             | 4.00            | 1.978(4)        | 0.0049        | 1.00            | 2.127(4)        | -0.0023       | 1.00            | 2.922(4)        | 0.0039        | -4.097        | 0.2620        |
|             | 0.00            | -               | -             | 5.00            | 2.012(4)        | 0.0102        | 1.00            | 2.936(5)        | 0.0049        | -2.176        | 0.3065        |
|             | 1.00            | 1.890(5)        | 0.0007        | 5.00            | 2.039(4)        | 0.0072        | 1.00            | 2.928(4)        | 0.0044        | -3.097        | 0.2484        |
|             | 2.00            | 1.915(4)        | 0.0021        | 4.00            | 2.064(4)        | 0.0045        | 1.00            | 2.926(4)        | 0.0042        | -3.397        | 0.2442        |
|             | 3.00            | 1.938(4)        | 0.0035        | 3.00            | 2.088(4)        | 0.0027        | 1.00            | 2.924(4)        | 0.0042        | -3.739        | 0.2414        |
| <b>4.00</b> | <b>1.959(3)</b> | <b>0.0053</b>   | <b>2.00</b>   | <b>2.109(4)</b> | <b>0.0012</b>   | <b>1.00</b>   | <b>2.922(4)</b> | <b>0.0041</b>   | <b>-4.198</b> | <b>0.2386</b> |               |
| 5.00        | 1.977(3)        | 0.0075          | 1.00          | 2.126(5)        | -0.0009         | 1.00          | 2.919(4)        | 0.0040          | -4.803        | 0.2361        |               |
| 0.00        | -               | -               | 6.00          | 2.006(4)        | 0.0120          | 1.00          | 2.931(4)        | 0.0048          | -3.015        | 0.2771        |               |
| 1.00        | 1.877(6)        | 0.0025          | 6.00          | 2.029(4)        | 0.0094          | 1.00          | 2.925(4)        | 0.0045          | -3.872        | 0.2554        |               |
| 2.00        | 1.897(5)        | 0.0043          | 5.00          | 2.048(4)        | 0.0071          | 1.00          | 2.922(4)        | 0.0045          | -4.295        | 0.2488        |               |
| 3.00        | 1.924(4)        | 0.0050          | 4.00          | 2.073(4)        | 0.0053          | 1.00          | 2.923(4)        | 0.0043          | -4.184        | 0.2426        |               |
| 4.00        | 1.942(4)        | 0.0066          | 3.00          | 2.089(5)        | 0.0042          | 1.00          | 2.920(4)        | 0.0043          | -4.678        | 0.2397        |               |
| <b>5.00</b> | <b>1.958(4)</b> | <b>0.0081</b>   | <b>2.00</b>   | <b>2.105(5)</b> | <b>0.0028</b>   | <b>1.00</b>   | <b>2.917(4)</b> | <b>0.0043</b>   | <b>-5.165</b> | <b>0.2375</b> |               |
| 6.00        | 1.976(3)        | 0.0098          | 1.00          | 2.123(5)        | 0.0005          | 1.00          | 2.916(4)        | 0.0041          | -5.359        | 0.2354        |               |
| 0.00        | -               | -               | 7.00          | 2.001(4)        | 0.0137          | 1.00          | 2.927(4)        | 0.0046          | -3.737        | 0.2738        |               |
| range       |                 | 1.93-1.96       |               | 2.01-2.11       |                 |               | 2.92-2.94       |                 |               |               |               |
| best        | <b>5.00</b>     | <b>1.958(4)</b> | <b>0.0081</b> | <b>2.00</b>     | <b>2.105(5)</b> | <b>0.0028</b> | <b>1.00</b>     | <b>2.917(4)</b> | <b>0.0043</b> | <b>-5.165</b> | <b>0.2375</b> |



**Table S6.** Results of fitting Fe *K*-edge EXAFS data for Mn<sup>IV</sup>/Fe<sup>III</sup>-R2. Scale factor  $S_0=1.0$ . Best fits for each coordination number are shown in bold. Fits with negative and unusually large Debye-Waller factors are shown in red and blue, respectively. Fits were performed over the region  $k = 1-11.6 \text{ \AA}^{-1}$ . Number of scatterers  $N$ , inter-atomic distance  $R$  ( $\text{\AA}$ ), mean-square deviation in  $R$ ,  $\sigma^2$  ( $\text{\AA}^2$ ), and the threshold energy shift  $E_0$  (eV) are listed. The fit-error  $F$  is defined as  $(\sum k^6(\chi_{\text{exptl}} - \chi_{\text{calc}})^2 / \sum k^6 \chi_{\text{exptl}}^2)^{1/2}$ .

| $S_0$       | <i>Fe-O</i>     |                 |               | <i>Fe-O/N</i>   |                 |               | <i>Fe-Mn</i>    |                 |               | $E_0$         | $F$           |
|-------------|-----------------|-----------------|---------------|-----------------|-----------------|---------------|-----------------|-----------------|---------------|---------------|---------------|
|             | $N$             | $R$             | $\sigma^2$    | $N$             | $R$             | $\sigma^2$    | $N$             | $R$             | $\sigma^2$    |               |               |
| 1.0         | 1.00            | 1.909(4)        | -0.0017       | 3.00            | 2.057(4)        | 0.0025        | 1.00            | 2.931(4)        | 0.0048        | -2.405        | 0.2890        |
|             | 2.00            | 1.942(4)        | 0.0003        | 2.00            | 2.091(4)        | -0.0004       | 1.00            | 2.926(4)        | 0.0046        | -3.103        | 0.2903        |
|             | 3.00            | 1.973(4)        | 0.0031        | 1.00            | 2.122(4)        | -0.0027       | 1.00            | 2.923(4)        | 0.0045        | -3.741        | 0.2870        |
|             | <b>0.00</b>     | -               | -             | <b>4.00</b>     | <b>2.013(4)</b> | <b>0.0092</b> | <b>1.00</b>     | <b>2.937(5)</b> | <b>0.0054</b> | <b>-1.987</b> | <b>0.3318</b> |
|             | 1.00            | 1.896(4)        | 0.0001        | 4.00            | 2.046(4)        | 0.0056        | 1.00            | 2.929(4)        | 0.0049        | -2.931        | 0.2490        |
|             | 2.00            | 1.926(4)        | 0.0018        | 3.00            | 2.075(4)        | 0.0029        | 1.00            | 2.926(4)        | 0.0048        | -3.319        | 0.2468        |
|             | <b>3.00</b>     | <b>1.953(3)</b> | <b>0.0036</b> | <b>2.00</b>     | <b>2.102(4)</b> | <b>0.0009</b> | <b>1.00</b>     | <b>2.924(4)</b> | <b>0.0047</b> | <b>-3.789</b> | <b>0.2445</b> |
|             | 4.00            | 1.976(3)        | 0.0061        | 1.00            | 2.124(4)        | -0.0011       | 1.00            | 2.921(4)        | 0.0046        | -4.376        | 0.2411        |
|             | 0.00            | -               | -             | 5.00            | 2.008(4)        | 0.0112        | 1.00            | 2.933(4)        | 0.0053        | -2.740        | 0.2826        |
|             | 1.00            | 1.884(6)        | 0.0025        | 5.00            | 2.034(4)        | 0.0085        | 1.00            | 2.926(4)        | 0.0051        | -3.665        | 0.2455        |
|             | 2.00            | 1.910(4)        | 0.0038        | 4.00            | 2.059(4)        | 0.0059        | 1.00            | 2.923(4)        | 0.0050        | -3.960        | 0.2388        |
|             | 3.00            | 1.936(4)        | 0.0049        | 3.00            | 2.085(4)        | 0.0040        | 1.00            | 2.923(4)        | 0.0049        | -4.130        | 0.2344        |
| <b>4.00</b> | <b>1.957(4)</b> | <b>0.0068</b>   | <b>2.00</b>   | <b>2.105(4)</b> | <b>0.0027</b>   | <b>1.00</b>   | <b>2.921(3)</b> | <b>0.0048</b>   | <b>-4.530</b> | <b>0.2314</b> |               |
| 5.00        | 1.975(3)        | 0.0089          | 1.00          | 2.122(5)        | 0.0004          | 1.00          | 2.918(3)        | 0.0047          | -5.106        | 0.2293        |               |
| 0.00        | -               | -               | 6.00          | 2.003(3)        | 0.0132          | 1.00          | 2.928(4)        | 0.0052          | -3.543        | 0.2681        |               |
| 1.00        | 1.869(9)        | 0.0049          | 6.00          | 2.024(4)        | 0.0109          | 1.00          | 2.923(4)        | 0.0051          | -4.314        | 0.2655        |               |
| 2.00        | 1.892(6)        | 0.0064          | 5.00          | 2.042(4)        | 0.0087          | 1.00          | 2.920(4)        | 0.0051          | -4.812        | 0.2573        |               |
| 3.00        | 1.916(5)        | 0.0071          | 4.00          | 2.063(5)        | 0.0070          | 1.00          | 2.918(4)        | 0.0050          | -5.068        | 0.2511        |               |
| <b>4.00</b> | <b>1.935(5)</b> | <b>0.0086</b>   | <b>3.00</b>   | <b>2.079(5)</b> | <b>0.0058</b>   | <b>1.00</b>   | <b>2.916(4)</b> | <b>0.0050</b>   | <b>-5.497</b> | <b>0.2478</b> |               |
| 5.00        | 1.953(4)        | 0.0099          | 2.00          | 2.096(6)        | 0.0044          | 1.00          | 2.914(4)        | 0.0049          | -5.772        | 0.2453        |               |
| 6.00        | 1.972(4)        | 0.0116          | 1.00          | 2.115(7)        | 0.0022          | 1.00          | 2.914(4)        | 0.0049          | -5.834        | 0.2433        |               |
| 0.00        | -               | -               | 7.00          | 1.997(4)        | 0.0150          | 1.00          | 2.924(4)        | 0.0051          | -4.373        | 0.2816        |               |
| range       |                 | 1.94-1.96       |               | 2.01-2.11       |                 |               | 2.92-2.94       |                 |               |               |               |
| best        | <b>4.00</b>     | <b>1.957(4)</b> | <b>0.0068</b> | <b>2.00</b>     | <b>2.105(4)</b> | <b>0.0027</b> | <b>1.00</b>     | <b>2.921(3)</b> | <b>0.0048</b> | <b>-4.530</b> | <b>0.2314</b> |

**Table S7.** Results of fitting the Mn *K*-edge Fourier-filtered EXAFS data. Fits were performed over the region  $k = 1-11.6 \text{ \AA}^{-1}$ . Number of scatterers  $N$ , interatomic distance  $R$  ( $\text{\AA}$ ), mean-square deviation in  $R$ ,  $\sigma^2$  ( $\text{\AA}^2$ ), and the threshold energy shift  $E_0$  (eV) are given. Metal coordination number was constrained to the value obtained from best fits of the raw data.

| $S_0$ | $N$  | <i>Mn-O</i> |            | <i>Mn-O/N</i> |          |            | $E_0$  |
|-------|------|-------------|------------|---------------|----------|------------|--------|
|       |      | $R$         | $\sigma^2$ | $N$           | $R$      | $\sigma^2$ |        |
| 0.8   | 0.00 | -           | -          | 5.00          | 1.964(4) | 0.0083     | -0.006 |
|       | 1.00 | 1.758(3)    | 0.0023     | 4.00          | 1.954(2) | 0.0036     | -3.626 |

**Table S8.** Results of fitting the Fe *K*-edge Fourier-filtered EXAFS data. Fits were performed over the region  $k = 1-11.6 \text{ \AA}^{-1}$ . Number of scatterers  $N$ , interatomic distance  $R$  ( $\text{\AA}$ ), mean-square deviation in  $R$ ,  $\sigma^2$  ( $\text{\AA}^2$ ), and the threshold energy shift  $E_0$  (eV) are given. Metal coordination number was constrained to the value obtained from best fits of the raw data.

| $S_0$ | $N$  | <i>Fe-O</i> |        | <i>Fe-O/N</i> |          |        | $E_0$  |
|-------|------|-------------|--------|---------------|----------|--------|--------|
|       |      | $R$         | $s^2$  | $N$           | $R$      | $s^2$  |        |
| 1.0   | 0.00 | -           | -      | 6.00          | 2.006(3) | 0.0120 | -3.608 |
|       | 4.00 | 1.952(3)    | 0.0068 | 2.00          | 2.092(4) | 0.0027 | -5.176 |

**Figure S3.** Photoreduction of Mn(IV)/Fe(III) sample. **A)** Mn(IV)/Fe(III) second-scan data was fit to a linear combination of Mn(IV)/Fe(III) and Mn(III)/Fe(III) *Ct*-R2 first-scan data. Best fit indicates sample was 27% reduced after first-scan. **B)** Exposure time at second scan edge is 870 seconds. Assuming that reduction is linear with exposure time, photoreduction of the first-scan at  $k=8$  (365.7 s) is 11%. **C)** Mn *K*-edge EXAFS data (left) and Fourier transform (right) for the Mn(IV)/Fe(III) complex of *Ct* R2 from  $k = 3.5\text{--}8 \text{ \AA}^{-1}$ . Arrow designates contributions resulting from metal backscattering. Values from the fit are given in Table S9.

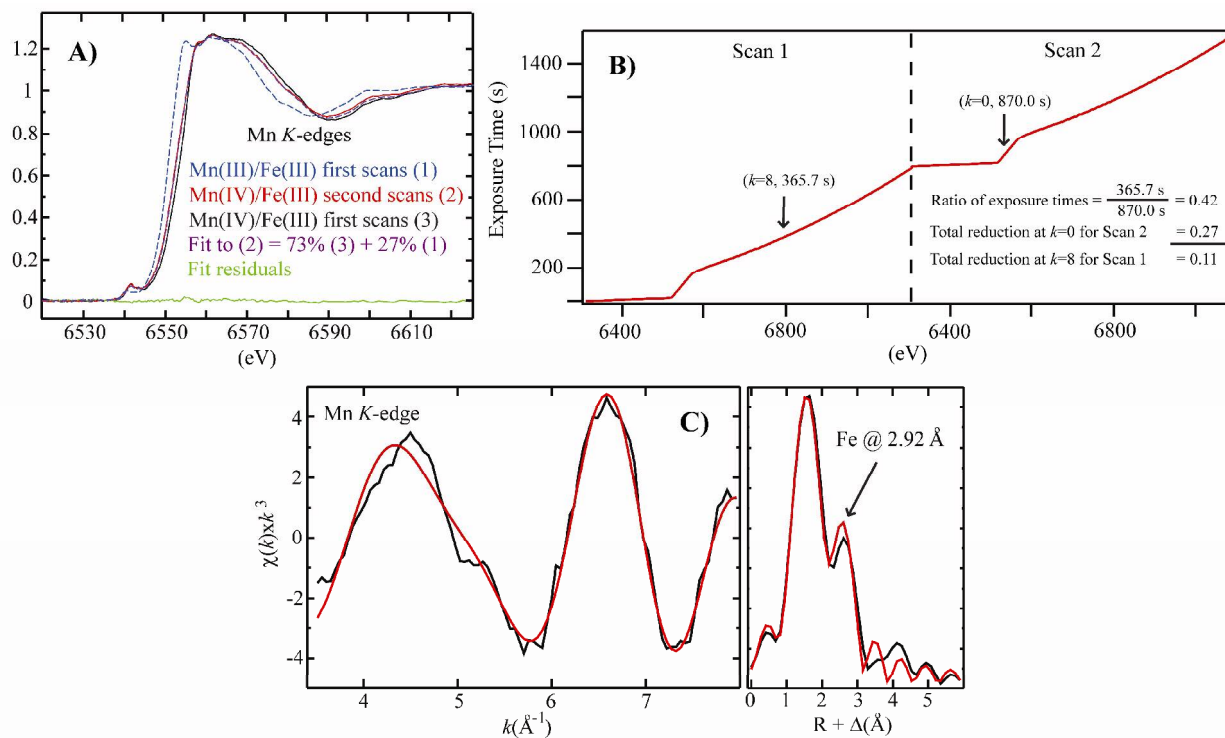

**Table S9.** Fit for Mn(IV)/Fe(III) *Ct* R2 data over the region  $k = 3.5\text{--}8 \text{ \AA}^{-1}$ . Number of scatterers  $N$ , inter-atomic distance  $R$  (Å), mean-square deviation in  $R$ ,  $\sigma^2$  (Å<sup>2</sup>), and the threshold energy shift  $E_0$  (eV) are listed. The fit-error  $F$  is defined as  $(\sum k^6 (\chi_{\text{exptl}} - \chi_{\text{calc}})^2 / \sum k^6 \chi_{\text{exptl}}^2)^{1/2}$ .  $N$  was constrained during fit.

| <i>Fe-O/N</i> |     |          |            | <i>Fe-Mn</i> |          |            | $E_0$  | $F$    |
|---------------|-----|----------|------------|--------------|----------|------------|--------|--------|
| $S_0$         | $N$ | $R$      | $\sigma^2$ | $N$          | $R$      | $\sigma^2$ |        |        |
| 0.9           | 4   | 1.948(5) | 0.0091     | 1            | 2.919(6) | 0.0005     | -1.214 | 0.1933 |

**Figure S4.** Model for *Ct* R2 Mn(IV)/Fe(III) cofactor (with metals M1 and M2), [(2,2'-bipyridine)<sub>2</sub>Mn(III)(μ-O)<sub>2</sub>Mn(IV)(2,2'-bipyridine)<sub>2</sub>]<sup>3+</sup> (**1**) (*J. Am. Chem. Soc.* **1972**, *94*, 2121-2222), [LFe(III)(μ-O)<sub>2</sub>Fe(IV)L]<sup>3+</sup> (**2**) with L = *tris*-(5-ethyl-2-pyridylmethyl)amine (*J. Am. Chem. Soc.* **1999**, *121*, 5230-5237), [L'Fe(IV)(μ-O)<sub>2</sub>Fe(IV)L']<sup>4+</sup> (**3**) with L' = *tris*-(3,5-methyl-4-methoxy-2-pyridylmethyl)amine (*Proc. Nat. Acad. Sci. USA* **2007**, *104*, 20713-20718), [L''Mn(III)μ-(OCH<sub>3</sub>)μ-1,3-(CH<sub>3</sub>COO)(OHCH<sub>3</sub>)Mn(III)L'']<sup>+</sup> (**4**) with L'' = 1,5-bis(salicylideneamino)-3-pentanol (*Z. Naturforsch* **1988**, *43b*, 472-474), and [L'''Mn(IV)(μ-O)<sub>2</sub>μ-1,3-(CH<sub>3</sub>COO)Mn(III)L''']<sup>2+</sup> (**5**) with L''' = *N,N*-bis(2-pyridylmethyl)ethylamine (*Inorg. Chem.* **1995**, *34*, 4708-4715). Hydrogens have been omitted.

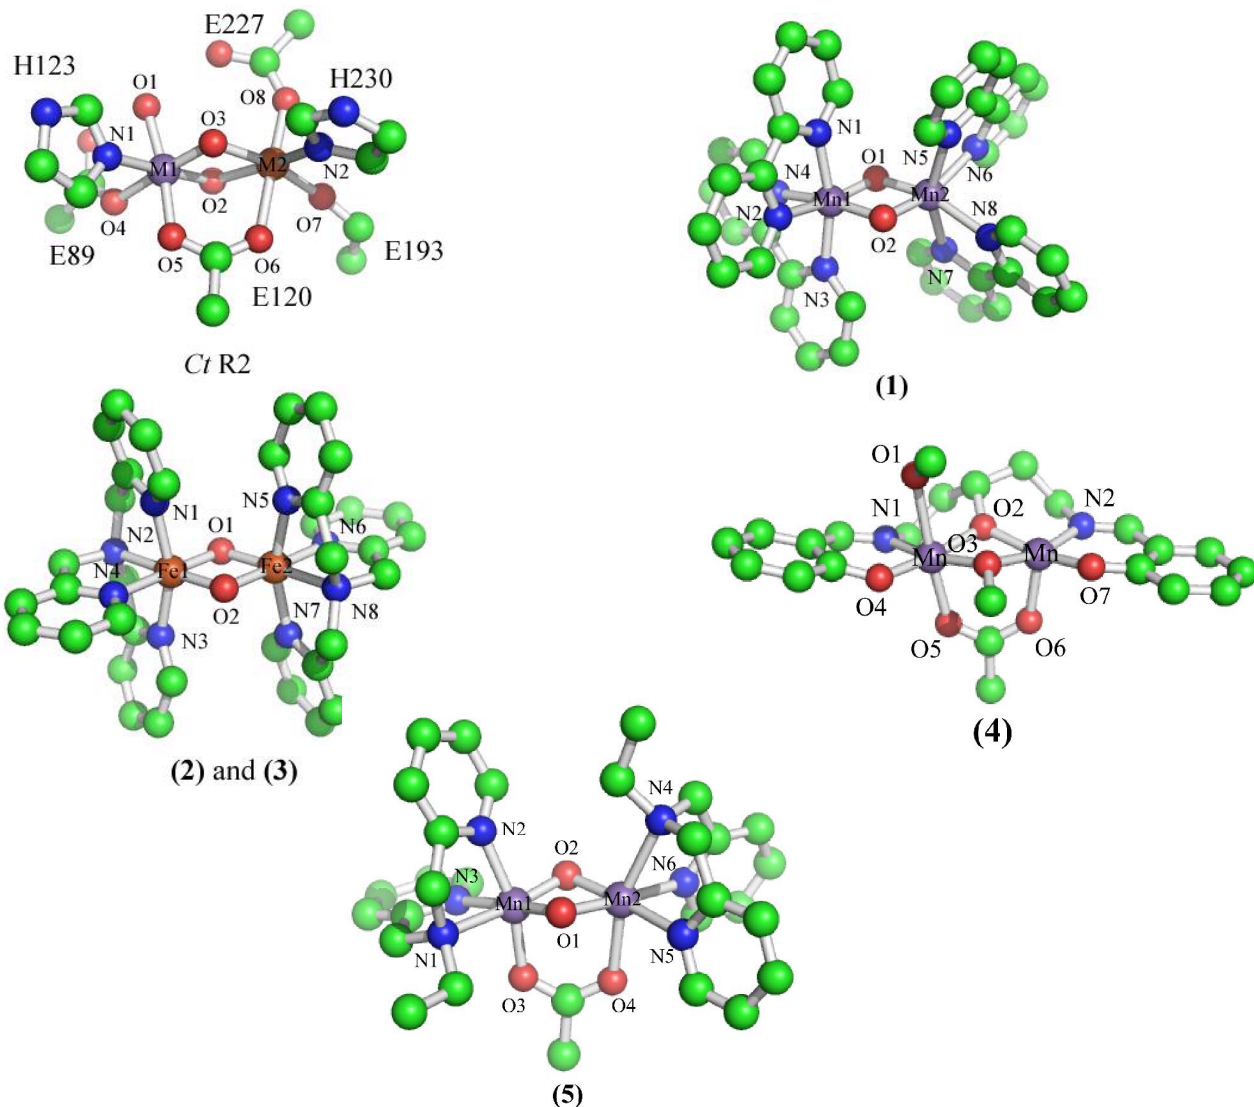

**Figure S5.** Selected experimental and theoretical bond distances for [(2,2'-bipyridine)<sub>2</sub>Mn(III)(μ-O)<sub>2</sub>Mn(IV)(2,2'-bipyridine)<sub>2</sub>]<sup>3+</sup> (**1**) (*J. Am. Chem. Soc.* **1972**, *94*, 2121-2222), [LFe(III)(μ-O)<sub>2</sub>Fe(IV)L]<sup>3+</sup> (**2**) with L = *tris*-(5-ethyl-2-pyridylmethyl)amine (*J. Am. Chem. Soc.* **1999**, *121*, 5230-5237), [L'Fe(IV)(μ-O)<sub>2</sub>Fe(IV)L']<sup>4+</sup> (**3**) with L' = *tris*-(3,5-methyl-4-methoxy-2-pyridylmethyl)amine (*Proc. Nat. Acad. Sci. USA* **2007**, *104*, 20713-20718), [L''Mn(III)μ-(OCH<sub>3</sub>)μ-1,3-(CH<sub>3</sub>COO)(OHCH<sub>3</sub>)Mn(III)L'']<sup>+</sup> (**4**) with L'' = 1,5-bis(salicylideneamino)-3-pentanol (*Z. Naturforsch* **1988**, *43b*, 472-474), and [L'''Mn(IV)(μ-O)<sub>2</sub>μ-1,3-(CH<sub>3</sub>COO)Mn(III)L''']<sup>2+</sup> (**5**) with L''' = *N,N*-bis(2-pyridylmethyl)ethylamine (*Inorg. Chem.* **1995**, *34*, 4708-4715). Calculations with the BP86 functional employed the TZP basis set via ADF for (**1-3**) and 6-311G\* via G03 for (**4-5**). B3LYP calculations employed 6-311G\* via G03. Experimental bond distances for (**1**), (**2**), (**4**), and (**5**) are from crystal structures; distances for (**3**) are from EXAFS spectroscopy (average Fe-O distance shown). A second crystal structure for (**1**), with all Mn-O bonds ~0.03 Å longer, has been reported (*Inorg. Chem.* **1995**, *34*, 4244-4252).

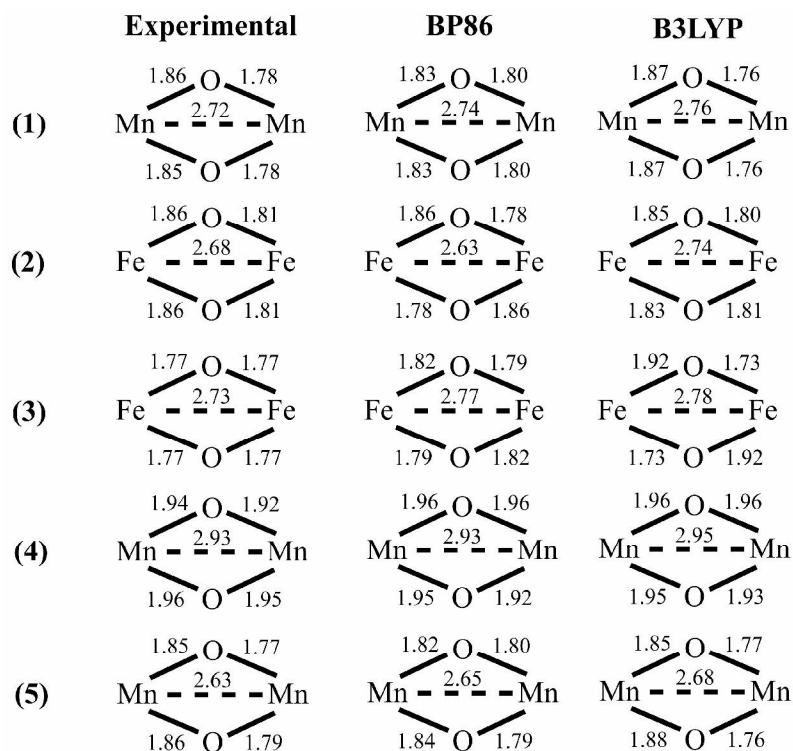

**Figure S6.** Selected core bond lengths for the BP86/TZP-optimized cofactor models ( $\mu$ -1,3-carboxylate is omitted). Structures containing metal-metal and Mn-O distances consistent with EXAFS measurements are shown in blue (metal-metal and Mn-O distances are in red).

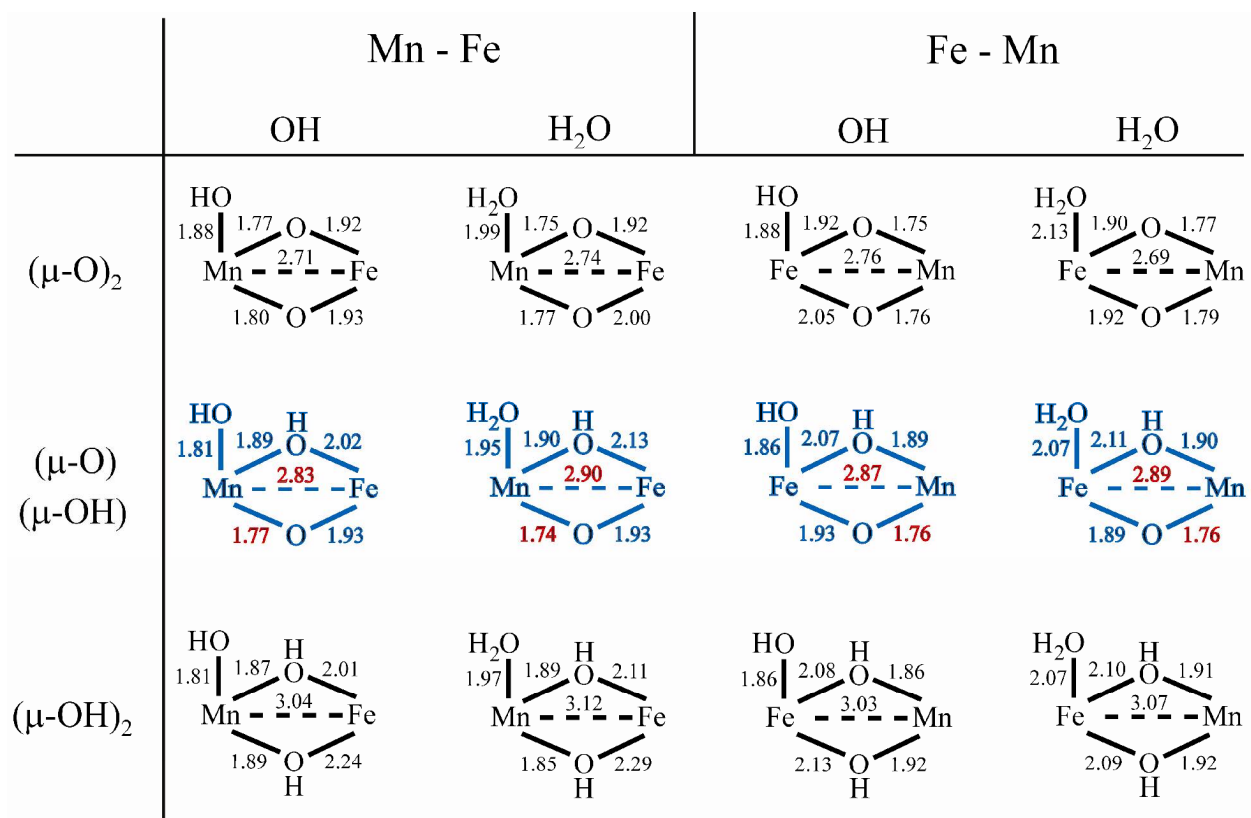

**Table S10.** Calculated  $^{57}\text{Fe}$  Mössbauer and hyperfine coupling constants for the *Ct* R2 Mn(IV)/Fe(III) models with experimental Mössbauer parameters and  $^{57}\text{Fe}$  hyperfine tensor (Jiang et al. *J. Am. Chem. Soc.* **2007** 129, 7504-7505). Hyperfine tensors are given in MHz, where  $\mathbf{A}=\mathbf{A}_{\text{iso}}\mathbf{I}+\mathbf{T}$  and  $\Delta\mathbf{T}$  is the range of  $\mathbf{T}$ . Quadrupole splittings,  $\Delta E_Q$ , and isomer shifts,  $\delta$ , are given in mm/s. The experimental values describing the electric field gradient tensor ( $\Delta E_Q = 1.32$  mm/s and asymmetry parameter,  $\eta$ , of -2.6) were rotated through the Euler angles  $(0, \pi/2, \pi/2)$  to place them in the coordinate frame of the calculations. Isomer shifts determined with the B3LYP functional using Neese's core properties basis set and (6-311G\* for Mn) (Neese, F. *Inorg. Chim. Acta* **2002**, 337, 181-192).

| exp <sup>a</sup>   | $^2\text{M}_0^1$ |       |       |       | $^2\text{M}_0^0$ |       |       |       | $^2\text{M}_1^1$ |       |       |       |       |
|--------------------|------------------|-------|-------|-------|------------------|-------|-------|-------|------------------|-------|-------|-------|-------|
|                    | BP86             |       | B3LYP |       | BP86             |       | B3LYP |       | BP86             |       | B3LYP |       |       |
|                    | Mn               | Fe    | Mn    | Fe    | Mn               | Fe    | Mn    | Fe    | Mn               | Fe    | Mn    | Fe    |       |
| $A_{\text{iso}}$   | -53.7            | -22.3 | -20.4 | -36.1 | -34.2            | -25.5 | -24.0 | -38.7 | -37.8            | -22.3 | -21.5 | -35.5 | -35.2 |
| T1                 | -1.6             | -2.5  | -2.5  | -3.0  | -3.2             | -1.0  | -1.6  | -2.0  | -1.4             | -1.1  | -0.8  | -1.9  | -1.6  |
| T2                 | 0.2              | 0.8   | -0.1  | 1.4   | 0.3              | -0.1  | 0.2   | 0.7   | -0.7             | 0.1   | 0.0   | 0.7   | 0.3   |
| T3                 | 1.4              | 1.8   | 2.6   | 1.7   | 2.8              | 1.0   | 1.4   | 1.3   | 2.2              | 1.0   | 0.8   | 1.2   | 1.3   |
| $\Delta\mathbf{T}$ | 3.0              | 4.3   | 5.1   | 4.7   | 6.0              | 2.0   | 3.0   | 3.2   | 3.6              | 2.1   | 1.6   | 3.1   | 2.9   |
| $\Delta E_q$       | -1.32            | -1.23 | -1.45 | -1.20 | -1.44            | 0.81  | -0.59 | 1.23  | 1.06             | -0.55 | -0.59 | -0.71 | -0.82 |
| $\eta$             | 0.11             | 0.24  | 0.71  | 0.10  | 0.29             | 0.99  | 0.96  | 0.85  | 0.89             | 0.50  | 0.14  | 0.32  | 0.50  |
| $\delta$           | 0.52             | -     | -     | 0.56  | 0.54             | -     | -     | 0.60  | 0.57             | -     | -     | 0.55  | 0.53  |

  

| exp <sup>a</sup>   | $^1\text{M}_0^1$ |       |       |       | $^1\text{M}_0^0$ |       |       |       | $^1\text{M}_1^1$ |       |       |       |       |
|--------------------|------------------|-------|-------|-------|------------------|-------|-------|-------|------------------|-------|-------|-------|-------|
|                    | BP86             |       | B3LYP |       | BP86             |       | B3LYP |       | BP86             |       | B3LYP |       |       |
|                    | Mn               | Fe    | Mn    | Fe    | Mn               | Fe    | Mn    | Fe    | Mn               | Fe    | Mn    | Fe    |       |
| $A_{\text{iso}}$   | -53.7            | -23.6 | -20.0 | -35.7 | -35.0            | -24.8 | -21.2 | -38.1 | -38.2            | -23.0 | -19.9 | -36.3 | -33.1 |
| T1                 | -1.6             | -1.7  | -1.0  | -2.9  | -1.2             | -1.7  | -1.6  | -1.6  | -1.1             | -0.6  | -1.0  | -1.2  | -1.3  |
| T2                 | 0.2              | -0.6  | 0.0   | 0.6   | 0.5              | 0.3   | 0.3   | -0.5  | 0.1              | 0.1   | -0.4  | 0.3   | 0.1   |
| T3                 | 1.4              | 2.3   | 1.1   | 2.3   | 0.7              | 1.4   | 1.3   | 2.1   | 1.0              | 0.5   | 1.4   | 1.0   | 1.2   |
| $\Delta\mathbf{T}$ | 3.0              | 4.0   | 2.1   | 5.2   | 1.9              | 3.1   | 2.9   | 3.7   | 2.1              | 1.1   | 2.4   | 2.2   | 2.5   |
| $\Delta E_q$       | -1.32            | -1.03 | -1.02 | -1.39 | 1.28             | 0.67  | -1.11 | 1.10  | -0.96            | -0.45 | -1.15 | -0.38 | -1.52 |
| $\eta$             | 0.11             | 0.47  | 0.84  | 0.16  | 0.94             | 0.72  | 0.40  | 0.85  | 0.61             | 0.35  | 0.38  | 0.33  | 0.29  |
| $\delta$           | 0.52             | -     | -     | 0.58  | 0.51             | -     | -     | 0.61  | 0.53             | -     | -     | 0.56  | 0.52  |

**Table S11.** BP86/TZP-optimized coordinate for model  ${}^2\text{Mn}^1_0$ . The broken-symmetry structure is on the left, ferromagnetic on the right.

|    |          |          |          |    |          |          |          |
|----|----------|----------|----------|----|----------|----------|----------|
| C  | 3.324958 | 1.901613 | 1.139415 | C  | 3.333108 | 1.898881 | 1.138221 |
| N  | 2.808749 | 1.435735 | 0.008187 | N  | 2.825559 | 1.42639  | 0.005841 |
| C  | 3.377785 | 2.147578 | -1.03056 | C  | 3.388613 | 2.143133 | -1.03271 |
| C  | 4.255672 | 3.06566  | -0.51197 | C  | 4.25363  | 3.07226  | -0.51291 |
| N  | 4.206255 | 2.894946 | 0.861709 | N  | 4.202212 | 2.902779 | 0.861171 |
| Mn | 1.472778 | -0.14199 | -0.09739 | Mn | 1.482989 | -0.13582 | -0.10231 |
| O  | 1.195409 | 0.360983 | -1.96318 | O  | 1.197847 | 0.371224 | -1.96161 |
| C  | 0.026525 | 0.498113 | -2.52349 | C  | 0.02872  | 0.510297 | -2.52254 |
| C  | 0.08139  | 1.026123 | -3.94688 | C  | 0.084103 | 1.033564 | -3.94737 |
| Fe | -1.41389 | -0.30835 | 0.111419 | Fe | -1.42748 | -0.32139 | 0.108419 |
| O  | -1.77756 | -0.9435  | 1.953748 | O  | -1.76609 | -0.93732 | 1.970649 |
| C  | -1.15512 | -1.10602 | 3.073912 | C  | -1.14425 | -1.10537 | 3.088467 |
| O  | 0.087782 | -1.05362 | 3.26516  | O  | 0.100242 | -1.05573 | 3.276698 |
| O  | 2.935643 | -1.31643 | -0.8329  | O  | 2.943297 | -1.32454 | -0.83338 |
| C  | 3.683564 | -2.16236 | -0.18933 | C  | 3.677321 | -2.17728 | -0.18417 |
| C  | 4.630729 | -2.96772 | -1.0624  | C  | 4.637249 | -2.9812  | -1.04428 |
| O  | 2.016758 | -0.58072 | 1.723635 | O  | 2.004147 | -0.58627 | 1.711746 |
| O  | 0.253991 | -1.59774 | -0.16767 | O  | 0.250371 | -1.57708 | -0.18787 |
| O  | 0.129149 | 0.776169 | 0.517481 | O  | 0.145082 | 0.841392 | 0.521072 |
| N  | -2.6337  | 1.4534   | 0.283703 | N  | -2.64783 | 1.444251 | 0.287412 |
| C  | -2.20177 | 2.60163  | 0.791072 | C  | -2.20718 | 2.591424 | 0.791016 |
| N  | -3.21541 | 3.504872 | 0.812417 | N  | -3.21483 | 3.501719 | 0.808879 |
| C  | -4.34788 | 2.896188 | 0.2888   | C  | -4.352   | 2.899671 | 0.2881   |
| C  | -3.97084 | 1.617455 | -0.03703 | C  | -3.98361 | 1.61727  | -0.03315 |
| O  | -2.78239 | -1.4719  | -0.59156 | O  | -2.78873 | -1.48835 | -0.59044 |
| C  | -3.7664  | -1.69948 | -1.43619 | C  | -3.77014 | -1.70951 | -1.44228 |
| C  | -3.63582 | -3.0047  | -2.20758 | C  | -3.63648 | -3.01084 | -2.21851 |
| O  | -1.08539 | 0.23862  | -2.00921 | O  | -1.08288 | 0.255743 | -2.00626 |
| O  | -4.74062 | -0.95038 | -1.59174 | O  | -4.74027 | -0.95703 | -1.59705 |
| O  | 3.674182 | -2.35178 | 1.05582  | O  | 3.644594 | -2.3745  | 1.059578 |
| C  | -2.06119 | -1.41283 | 4.257893 | C  | -2.04874 | -1.41219 | 4.273145 |
| H  | -0.87495 | 0.853919 | -4.44962 | H  | -0.87247 | 0.859137 | -4.44934 |
| H  | 0.903032 | 0.554047 | -4.49888 | H  | 0.905553 | 0.560097 | -4.49882 |
| H  | 0.275416 | 2.107975 | -3.91374 | H  | 0.277271 | 2.115761 | -3.91742 |
| H  | 5.273813 | -2.28693 | -1.63643 | H  | 5.282469 | -2.30051 | -1.61611 |
| H  | 5.241635 | -3.63512 | -0.44706 | H  | 5.245503 | -3.64403 | -0.42071 |
| H  | 4.050746 | -3.55514 | -1.78757 | H  | 4.065639 | -3.57472 | -1.77139 |
| H  | -2.55787 | -2.37764 | 4.083541 | H  | -2.55121 | -2.37378 | 4.096256 |
| H  | -2.85007 | -0.65241 | 4.330366 | H  | -2.83393 | -0.64784 | 4.347275 |
| H  | -1.48272 | -1.45763 | 5.186015 | H  | -1.47116 | -1.46211 | 5.201735 |
| H  | 1.162477 | -0.81985 | 2.288597 | H  | 1.149131 | -0.81788 | 2.288448 |
| H  | 2.657258 | -1.4     | 1.595636 | H  | 2.643435 | -1.40974 | 1.587854 |
| H  | -2.76179 | -2.9466  | -2.87178 | H  | -2.75984 | -2.95012 | -2.87939 |
| H  | -4.53809 | -3.18585 | -2.80107 | H  | -4.53622 | -3.19036 | -2.81639 |
| H  | -3.46347 | -3.83591 | -1.51074 | H  | -3.46589 | -3.84472 | -1.52419 |



|   |          |          |          |   |          |          |          |
|---|----------|----------|----------|---|----------|----------|----------|
| H | -4.52683 | 0.800796 | -0.49876 | H | -4.54571 | 0.804644 | -0.49313 |
| H | -5.29087 | 3.419851 | 0.194972 | H | -5.29186 | 3.429283 | 0.193488 |
| H | -3.15075 | 4.457036 | 1.152322 | H | -3.14293 | 4.455036 | 1.144847 |
| H | -1.19037 | 2.790522 | 1.1295   | H | -1.19217 | 2.77167  | 1.125093 |
| H | 3.092788 | 1.521975 | 2.125855 | H | 3.097943 | 1.522308 | 2.12545  |
| H | 4.747722 | 3.405528 | 1.549582 | H | 4.736604 | 3.420243 | 1.549722 |
| H | 4.895162 | 3.801469 | -0.98231 | H | 4.886259 | 3.81425  | -0.98331 |
| H | 3.113453 | 1.93921  | -2.05909 | H | 3.127375 | 1.932078 | -2.06159 |
| H | 0.411926 | -2.12878 | -0.97214 | H | 0.358432 | -2.0658  | -1.02664 |

**Table S12.** BP86/TZP-optimized coordinate for model  ${}^2\text{Fe}^1_0$ . The broken-symmetry structure is on the left, ferromagnetic on the right.

|    |          |          |          |    |          |          |          |
|----|----------|----------|----------|----|----------|----------|----------|
| Fe | 1.542086 | -0.12669 | -0.09017 | Fe | 1.545992 | -0.12335 | -0.09019 |
| Mn | -1.34485 | -0.19951 | 0.043668 | Mn | -1.357   | -0.20055 | 0.041777 |
| O  | -0.02119 | -1.53815 | -0.23573 | O  | -0.02607 | -1.52803 | -0.23531 |
| O  | 0.025692 | 0.723557 | 0.643195 | O  | 0.021782 | 0.78371  | 0.662174 |
| O  | 2.120289 | -0.72623 | 1.803652 | O  | 2.129286 | -0.72821 | 1.806332 |
| H  | 1.241328 | -0.93525 | 2.269939 | H  | 1.248834 | -0.9341  | 2.273161 |
| H  | 2.633485 | -1.59975 | 1.578029 | H  | 2.638446 | -1.60241 | 1.588691 |
| N  | 3.019089 | 1.458387 | 0.073489 | N  | 3.03259  | 1.450061 | 0.065857 |
| C  | 3.725043 | 1.684438 | 1.1757   | C  | 3.736152 | 1.6821   | 1.167981 |
| H  | 3.612749 | 1.134877 | 2.102719 | H  | 3.625263 | 1.134177 | 2.09618  |
| N  | 4.60967  | 2.692054 | 0.960319 | N  | 4.611914 | 2.697252 | 0.952914 |
| H  | 5.270529 | 3.050451 | 1.640429 | H  | 5.268282 | 3.062076 | 1.63395  |
| C  | 4.462408 | 3.127925 | -0.34689 | C  | 4.460979 | 3.132483 | -0.35389 |
| H  | 5.06526  | 3.92609  | -0.76167 | H  | 5.055694 | 3.937108 | -0.76802 |
| C  | 3.468471 | 2.348491 | -0.88421 | C  | 3.474293 | 2.34446  | -0.89163 |
| H  | 3.047057 | 2.352572 | -1.88189 | H  | 3.050198 | 2.348738 | -1.88807 |
| O  | 2.809756 | -1.46165 | -0.91851 | O  | 2.801031 | -1.47755 | -0.90372 |
| C  | 3.476376 | -2.41976 | -0.34863 | C  | 3.477751 | -2.43384 | -0.33952 |
| O  | 3.489102 | -2.66495 | 0.886368 | O  | 3.497106 | -2.6806  | 0.893843 |
| C  | 4.289719 | -3.28918 | -1.2927  | C  | 4.292257 | -3.2935  | -1.29091 |
| H  | 3.603308 | -3.85209 | -1.94141 | H  | 3.60753  | -3.85832 | -1.93955 |
| H  | 4.90607  | -2.65626 | -1.94492 | H  | 4.90221  | -2.65308 | -1.94182 |
| H  | 4.918523 | -3.98706 | -0.73053 | H  | 4.927625 | -3.98902 | -0.73329 |
| O  | 1.130528 | 0.641363 | -1.99878 | O  | 1.125116 | 0.639595 | -1.99475 |
| C  | -0.05674 | 0.822783 | -2.41798 | C  | -0.062   | 0.821489 | -2.41531 |
| O  | -1.14546 | 0.521304 | -1.81256 | O  | -1.14857 | 0.518846 | -1.80661 |
| C  | -0.22249 | 1.466401 | -3.78301 | C  | -0.22796 | 1.468405 | -3.77791 |
| H  | -1.23746 | 1.317262 | -4.1643  | H  | -1.24278 | 1.322309 | -4.16061 |
| H  | -0.03478 | 2.545695 | -3.68402 | H  | -0.03875 | 2.547073 | -3.6743  |
| H  | 0.520874 | 1.057073 | -4.47758 | H  | 0.515683 | 1.061433 | -4.47355 |
| O  | -2.60172 | -1.46481 | -0.7766  | O  | -2.61848 | -1.47324 | -0.76683 |
| C  | -3.68047 | -1.54692 | -1.52188 | C  | -3.67932 | -1.54299 | -1.53922 |
| O  | -4.48801 | -0.63952 | -1.76734 | O  | -4.46359 | -0.62357 | -1.815   |
| C  | -3.87817 | -2.9465  | -2.10267 | C  | -3.8884  | -2.94445 | -2.11025 |
| H  | -3.73959 | -3.70725 | -1.32312 | H  | -3.74199 | -3.70329 | -1.33056 |

|   |          |          |          |   |          |          |          |
|---|----------|----------|----------|---|----------|----------|----------|
| H | -4.87349 | -3.03321 | -2.55086 | H | -4.8883  | -3.03022 | -2.54845 |
| H | -3.11584 | -3.12508 | -2.87561 | H | -3.13557 | -3.12548 | -2.89208 |
| N | -2.56444 | 1.42122  | 0.396064 | N | -2.57657 | 1.415301 | 0.3966   |
| C | -2.16915 | 2.427543 | 1.17031  | C | -2.17724 | 2.420072 | 1.171041 |
| H | -1.19495 | 2.505476 | 1.636614 | H | -1.19813 | 2.491157 | 1.628561 |
| N | -3.16965 | 3.335812 | 1.273375 | N | -3.1768  | 3.328574 | 1.275891 |
| H | -3.12487 | 4.195957 | 1.807019 | H | -3.12863 | 4.189169 | 1.808568 |
| C | -4.24963 | 2.883376 | 0.528423 | C | -4.25869 | 2.879216 | 0.531624 |
| H | -5.17307 | 3.443333 | 0.451892 | H | -5.18081 | 3.441424 | 0.455653 |
| C | -3.85923 | 1.68589  | -0.01571 | C | -3.87155 | 1.681468 | -0.01388 |
| H | -4.36891 | 0.982156 | -0.67537 | H | -4.3804  | 0.981716 | -0.67796 |
| C | -1.32784 | -1.22184 | 2.832293 | C | -1.31166 | -1.22624 | 2.838584 |
| O | -1.95001 | -0.89196 | 1.730238 | O | -1.93263 | -0.8901  | 1.736531 |
| O | -0.10949 | -1.16323 | 3.081253 | O | -0.09406 | -1.17376 | 3.087532 |
| C | -2.2869  | -1.75893 | 3.88956  | C | -2.27512 | -1.76108 | 3.893132 |
| H | -2.58958 | -2.77542 | 3.599307 | H | -2.57775 | -2.77794 | 3.604028 |
| H | -1.78594 | -1.79615 | 4.862516 | H | -1.77753 | -1.79719 | 4.867835 |
| H | -3.1952  | -1.14575 | 3.938376 | H | -3.18295 | -1.14697 | 3.938249 |
| H | -0.31858 | -2.11881 | -0.96456 | H | -0.28117 | -2.09005 | -0.99337 |

**Table S13.** BP86/TZP-optimized coordinate for model  ${}^2\text{Mn}^0_0$ . The broken-symmetry structure is on the left, ferromagnetic on the right.

|    |          |          |          |    |          |          |          |
|----|----------|----------|----------|----|----------|----------|----------|
| Mn | 1.467852 | -0.15279 | -0.03066 | Mn | 1.467083 | -0.15077 | -0.04111 |
| Fe | -1.25787 | -0.35287 | 0.125836 | Fe | -1.25769 | -0.35019 | 0.123947 |
| C  | -2.35103 | 2.610968 | 0.405376 | C  | -2.34817 | 2.610524 | 0.405506 |
| N  | -2.66169 | 1.413809 | -0.05684 | N  | -2.65543 | 1.411456 | -0.05465 |
| C  | -3.9657  | 1.473016 | -0.50928 | C  | -3.9605  | 1.464502 | -0.50607 |
| C  | -4.4507  | 2.745294 | -0.31562 | C  | -4.44976 | 2.734991 | -0.31346 |
| N  | -3.41086 | 3.460596 | 0.268962 | N  | -3.41183 | 3.454929 | 0.26916  |
| O  | -2.7216  | -1.63009 | -0.32511 | O  | -2.72836 | -1.62153 | -0.31336 |
| C  | -3.59911 | -2.03702 | -1.18909 | C  | -3.59763 | -2.02791 | -1.18798 |
| O  | -4.57019 | -1.38016 | -1.62367 | O  | -4.56007 | -1.36877 | -1.63486 |
| O  | 3.099069 | -1.376   | -0.37283 | O  | 3.099136 | -1.38089 | -0.36971 |
| C  | 3.605379 | -2.22859 | 0.452743 | C  | 3.608874 | -2.22899 | 0.458969 |
| O  | 3.455857 | -2.24337 | 1.703295 | O  | 3.466025 | -2.23834 | 1.710022 |
| N  | 2.865632 | 1.48808  | -0.30949 | N  | 2.864034 | 1.49536  | -0.30389 |
| C  | 4.209194 | 1.520082 | -0.61489 | C  | 4.20763  | 1.522486 | -0.60975 |
| C  | 4.630945 | 2.826877 | -0.68112 | C  | 4.63387  | 2.827795 | -0.67589 |
| N  | 3.504873 | 3.59123  | -0.40795 | N  | 3.510322 | 3.59587  | -0.40072 |
| C  | 2.46274  | 2.739553 | -0.18927 | C  | 2.464998 | 2.747801 | -0.18203 |
| O  | 1.979919 | -0.11548 | 1.893904 | O  | 1.973059 | -0.11661 | 1.88195  |
| O  | 0.314254 | -1.4529  | 0.156996 | O  | 0.309319 | -1.48054 | 0.148379 |
| O  | 0.182263 | 1.031755 | 0.262671 | O  | 0.183631 | 1.06062  | 0.238964 |
| O  | 1.283214 | -0.0928  | -1.99867 | O  | 1.276061 | -0.09931 | -1.99858 |
| C  | 0.13861  | -0.12505 | -2.59983 | C  | 0.132764 | -0.13258 | -2.59903 |
| O  | -1.00424 | -0.17057 | -2.0839  | O  | -1.00917 | -0.18292 | -2.07692 |
| O  | -1.81645 | -0.41985 | 2.097529 | O  | -1.82687 | -0.41409 | 2.102423 |

|   |          |          |          |   |          |          |          |
|---|----------|----------|----------|---|----------|----------|----------|
| C | -1.25278 | -0.33435 | 3.24432  | C | -1.25606 | -0.3384  | 3.24827  |
| C | -2.21499 | -0.52878 | 4.42136  | C | -2.20893 | -0.52823 | 4.435015 |
| C | 0.233502 | -0.13686 | -4.12434 | C | 0.228156 | -0.14235 | -4.12282 |
| C | 4.446    | -3.32489 | -0.20109 | C | 4.450868 | -3.32732 | -0.19227 |
| O | -0.03484 | -0.12398 | 3.503974 | O | -0.03654 | -0.14177 | 3.501475 |
| C | -3.38197 | -3.48007 | -1.65575 | C | -3.38067 | -3.47256 | -1.65208 |
| H | -0.66584 | 0.317474 | -4.55622 | H | -0.66836 | 0.312773 | -4.55875 |
| H | 0.284197 | -1.18399 | -4.45839 | H | 0.281635 | -1.18884 | -4.45738 |
| H | 1.139548 | 0.377401 | -4.46774 | H | 1.135652 | 0.372094 | -4.46143 |
| H | 4.992025 | -2.93209 | -1.06892 | H | 5.000439 | -2.93679 | -1.05872 |
| H | 5.133578 | -3.77657 | 0.524397 | H | 5.136047 | -3.77714 | 0.536097 |
| H | 3.758463 | -4.10245 | -0.56679 | H | 3.765054 | -4.10555 | -0.55916 |
| H | -2.54657 | -1.5779  | 4.42947  | H | -2.53832 | -1.57757 | 4.452626 |
| H | -3.11064 | 0.091113 | 4.276503 | H | -3.10632 | 0.091015 | 4.30196  |
| H | -1.72946 | -0.29249 | 5.375572 | H | -1.70828 | -0.28889 | 5.38069  |
| H | 1.116358 | -0.15376 | 2.463602 | H | 1.113191 | -0.16463 | 2.450134 |
| H | 2.497309 | -0.9927  | 1.993369 | H | 2.497744 | -0.98774 | 1.988898 |
| H | -2.40663 | -3.55028 | -2.15875 | H | -2.40507 | -3.54308 | -2.15373 |
| H | -4.18115 | -3.79663 | -2.3373  | H | -4.1789  | -3.78629 | -2.33566 |
| H | -3.33987 | -4.14742 | -0.78275 | H | -3.34142 | -4.14076 | -0.78012 |
| H | -4.43045 | 0.57967  | -0.93571 | H | -4.42209 | 0.569402 | -0.93153 |
| H | -5.40959 | 3.203123 | -0.53157 | H | -5.40971 | 3.188479 | -0.53042 |
| H | -3.43723 | 4.430562 | 0.560573 | H | -3.44325 | 4.424871 | 0.558634 |
| H | -1.39129 | 2.876486 | 0.834889 | H | -1.38837 | 2.878089 | 0.832686 |
| H | 1.441115 | 3.018699 | 0.044806 | H | 1.444129 | 3.027504 | 0.052956 |
| H | 3.461314 | 4.602371 | -0.36885 | H | 3.470909 | 4.606886 | -0.36313 |
| H | 5.596962 | 3.273108 | -0.88757 | H | 5.600157 | 3.271177 | -0.88435 |
| H | 4.765523 | 0.602004 | -0.76471 | H | 4.758883 | 0.601706 | -0.76026 |

**Table S14.** BP86/TZP-optimized coordinate for model  ${}^2\text{Fe}^0_0$ . The broken-symmetry structure is on the left, ferromagnetic on the right.

|    |          |          |          |    |          |          |          |
|----|----------|----------|----------|----|----------|----------|----------|
| C  | 1.57251  | -0.12037 | -0.07032 | C  | 1.573566 | -0.12875 | -0.06033 |
| N  | 0.191645 | -0.15668 | -0.00355 | N  | 0.193307 | -0.16822 | 0.003399 |
| C  | -0.185   | -1.40966 | -0.20484 | C  | -0.18227 | -1.42118 | -0.19631 |
| N  | 0.908268 | -2.19775 | -0.39878 | N  | 0.913414 | -2.20778 | -0.38361 |
| C  | 2.037867 | -1.38965 | -0.31779 | C  | 2.041443 | -1.39804 | -0.30269 |
| Mn | -1.31396 | 1.365237 | 0.334131 | Mn | -1.29613 | 1.366369 | 0.327431 |
| O  | -1.28255 | 0.761305 | 2.20138  | O  | -1.30377 | 0.763235 | 2.191148 |
| C  | -2.1663  | 0.31212  | 3.023848 | C  | -2.18911 | 0.309867 | 3.019383 |
| C  | -1.56995 | 0.008601 | 4.403923 | C  | -1.58613 | 0.008044 | 4.397928 |
| Fe | -3.83624 | 1.497478 | -0.59143 | Fe | -3.83903 | 1.506219 | -0.5909  |
| O  | -2.93191 | 2.077565 | -2.45664 | O  | -2.93254 | 2.10702  | -2.4288  |
| C  | -1.66371 | 2.201132 | -2.46859 | C  | -1.66747 | 2.212671 | -2.46262 |
| C  | -1.03014 | 2.637227 | -3.78623 | C  | -1.04074 | 2.636667 | -3.78715 |
| O  | -2.65367 | 2.509351 | 0.491145 | O  | -2.63968 | 2.546222 | 0.477404 |
| O  | -2.48832 | 0.164676 | -0.26944 | O  | -2.47102 | 0.153213 | -0.312   |
| O  | -5.07625 | 0.611623 | 0.899774 | O  | -5.08567 | 0.610132 | 0.904415 |

|   |          |          |          |   |          |          |          |
|---|----------|----------|----------|---|----------|----------|----------|
| N | -5.07498 | 0.150044 | -2.01041 | N | -5.07361 | 0.141942 | -2.00423 |
| C | -5.94191 | -0.74758 | -1.55184 | C | -5.93703 | -0.74865 | -1.55177 |
| N | -6.55943 | -1.37871 | -2.59207 | N | -6.55567 | -1.38325 | -2.59076 |
| C | -6.0564  | -0.85063 | -3.77325 | C | -6.05052 | -0.85655 | -3.77151 |
| C | -5.13613 | 0.093815 | -3.3815  | C | -5.1309  | 0.088926 | -3.38229 |
| O | -5.31149 | 2.964588 | -0.85151 | O | -5.31388 | 2.965082 | -0.83392 |
| C | -6.24369 | 3.321076 | -0.03782 | C | -6.25296 | 3.317686 | -0.03003 |
| C | -6.94434 | 4.631026 | -0.40879 | C | -6.9573  | 4.624934 | -0.3983  |
| O | -0.84605 | 1.991669 | -1.51361 | O | -0.8378  | 1.989808 | -1.51535 |
| O | 0.04385  | 2.730583 | 0.978763 | O | 0.053455 | 2.725293 | 0.979373 |
| C | 1.200287 | 3.276412 | 0.766507 | C | 1.199703 | 3.276501 | 0.759836 |
| C | 1.270908 | 4.724533 | 1.289528 | C | 1.273216 | 4.719733 | 1.284446 |
| O | -6.61325 | 2.709816 | 1.001228 | O | -6.62969 | 2.699884 | 1.007055 |
| O | 2.2074   | 2.780924 | 0.225987 | O | 2.20843  | 2.781294 | 0.20333  |
| O | -3.39297 | 0.103024 | 2.845472 | O | -3.40922 | 0.100634 | 2.845507 |
| H | -4.40219 | 0.477718 | 1.64831  | H | -4.41536 | 0.473508 | 1.654219 |
| H | -5.67744 | 1.405416 | 1.114441 | H | -5.69121 | 1.405443 | 1.118685 |
| H | -6.1302  | -0.92876 | -0.50101 | H | -6.12948 | -0.93061 | -0.49956 |
| H | -7.2705  | -2.09649 | -2.51021 | H | -7.26646 | -2.10032 | -2.50838 |
| H | -6.39495 | -1.18548 | -4.74621 | H | -6.38838 | -1.19324 | -4.74462 |
| H | -4.51161 | 0.744396 | -3.98567 | H | -4.50659 | 0.738617 | -3.98516 |
| H | -6.22414 | 5.456571 | -0.31566 | H | -6.23695 | 5.451068 | -0.31089 |
| H | -7.26536 | 4.596571 | -1.45906 | H | -7.28474 | 4.588506 | -1.44681 |
| H | -7.80234 | 4.816693 | 0.247764 | H | -7.81189 | 4.810459 | 0.26257  |
| H | -0.00017 | 2.974915 | -3.62843 | H | -0.00945 | 2.974016 | -3.6384  |
| H | -1.02255 | 1.778075 | -4.47334 | H | -1.03732 | 1.771415 | -4.46688 |
| H | -1.6344  | 3.430924 | -4.24317 | H | -1.64663 | 3.427074 | -4.24772 |
| H | 0.928176 | 4.767584 | 2.332489 | H | 0.931052 | 4.757356 | 2.328137 |
| H | 2.293275 | 5.114104 | 1.206769 | H | 2.293067 | 5.114506 | 1.200612 |
| H | 0.586303 | 5.352086 | 0.7005   | H | 0.583235 | 5.345205 | 0.69902  |
| H | -1.21989 | -1.73264 | -0.23034 | H | -1.21756 | -1.74302 | -0.22814 |
| H | 0.890652 | -3.19466 | -0.57241 | H | 0.897985 | -3.20441 | -0.56015 |
| H | 3.03802  | -1.78507 | -0.44884 | H | 3.042784 | -1.79106 | -0.43267 |
| H | 2.084397 | 0.840115 | 0.044326 | H | 2.083612 | 0.833277 | 0.048752 |
| H | -1.19922 | 0.943056 | 4.848792 | H | -1.21631 | 0.943629 | 4.840717 |
| H | -2.32706 | -0.43902 | 5.057383 | H | -2.34319 | -0.43848 | 5.052708 |
| H | -0.70828 | -0.66519 | 4.297734 | H | -0.72466 | -0.66579 | 4.293106 |

**Table S15.** BP86/TZP-optimized coordinate for model  ${}^2\text{Mn}^1_1$ . The broken-symmetry structure is on the left, ferromagnetic on the right.

|    |          |          |          |    |          |          |          |
|----|----------|----------|----------|----|----------|----------|----------|
| C  | 2.852594 | 2.486229 | 0.787644 | C  | 2.85284  | 2.486469 | 0.791024 |
| N  | 3.062068 | 1.284947 | 0.249404 | N  | 3.062215 | 1.285953 | 0.251067 |
| C  | 4.411725 | 1.190122 | -0.04398 | C  | 4.411253 | 1.191895 | -0.04523 |
| C  | 5.023862 | 2.359157 | 0.326112 | C  | 5.023423 | 2.360537 | 0.325614 |
| N  | 4.023519 | 3.159967 | 0.846621 | N  | 4.023795 | 3.160217 | 0.849246 |
| Mn | 1.618871 | -0.13257 | -0.02941 | Mn | 1.61956  | -0.13187 | -0.02998 |
| O  | 1.455104 | 0.560635 | -1.81612 | O  | 1.455993 | 0.559019 | -1.81677 |

|    |          |          |          |    |          |          |          |
|----|----------|----------|----------|----|----------|----------|----------|
| C  | 0.3581   | 0.807516 | -2.46872 | C  | 0.358891 | 0.808648 | -2.46981 |
| C  | 0.555119 | 1.299887 | -3.88241 | C  | 0.556788 | 1.301768 | -3.8833  |
| Fe | -1.49742 | -0.1767  | -0.24134 | Fe | -1.49846 | -0.17797 | -0.24211 |
| O  | -1.94615 | -0.78223 | 1.604637 | O  | -1.94644 | -0.78408 | 1.605903 |
| C  | -1.37199 | -0.66863 | 2.751385 | C  | -1.37295 | -0.66904 | 2.752233 |
| O  | -0.26502 | -0.05956 | 2.92963  | O  | -0.26449 | -0.06068 | 2.92753  |
| O  | 2.940556 | -1.37428 | -0.70969 | O  | 2.939699 | -1.3762  | -0.71025 |
| C  | 3.345452 | -2.50289 | -0.16001 | C  | 3.345471 | -2.50448 | -0.15934 |
| C  | 4.259737 | -3.33797 | -1.01992 | C  | 4.262108 | -3.33824 | -1.01806 |
| O  | 2.017592 | -0.769   | 1.788975 | O  | 2.016721 | -0.76765 | 1.787485 |
| O  | 0.229494 | -1.3908  | -0.26127 | O  | 0.230426 | -1.39177 | -0.26442 |
| O  | 0.282335 | 0.965886 | 0.627505 | O  | 0.283992 | 0.969398 | 0.627204 |
| N  | -2.74466 | 1.519416 | -0.05699 | N  | -2.74502 | 1.519035 | -0.05631 |
| C  | -2.40527 | 2.807942 | -0.05193 | C  | -2.40522 | 2.807438 | -0.05131 |
| N  | -3.51604 | 3.571721 | 0.074407 | N  | -3.5158  | 3.57173  | 0.0744   |
| C  | -4.61685 | 2.734745 | 0.155048 | C  | -4.61686 | 2.735111 | 0.154126 |
| C  | -4.12486 | 1.458388 | 0.071639 | C  | -4.12523 | 1.458494 | 0.072091 |
| O  | -2.61073 | -1.39206 | -1.12804 | O  | -2.61209 | -1.39244 | -1.129   |
| C  | -3.75084 | -2.08357 | -0.932   | C  | -3.75188 | -2.08319 | -0.9305  |
| C  | -3.71575 | -3.48326 | -1.49762 | C  | -3.7171  | -3.48294 | -1.49627 |
| O  | -0.81075 | 0.650214 | -2.02925 | O  | -0.80963 | 0.65045  | -2.03072 |
| O  | -4.72304 | -1.59643 | -0.36547 | O  | -4.7235  | -1.59623 | -0.36271 |
| O  | 3.037675 | -2.8732  | 0.996103 | O  | 3.036028 | -2.87534 | 0.996017 |
| C  | -2.06185 | -1.31265 | 3.927006 | C  | -2.0615  | -1.31137 | 3.92937  |
| H  | -0.29493 | 1.920802 | -4.1836  | H  | -0.29389 | 1.922247 | -4.18404 |
| H  | 0.590342 | 0.422981 | -4.54597 | H  | 0.59156  | 0.424883 | -4.54719 |
| H  | 1.50131  | 1.841925 | -3.98183 | H  | 1.502744 | 1.844046 | -3.98378 |
| H  | 5.299985 | -3.07843 | -0.77195 | H  | 5.302281 | -3.07806 | -0.76986 |
| H  | 4.117056 | -4.39887 | -0.78683 | H  | 4.119969 | -4.39913 | -0.78467 |
| H  | 4.096881 | -3.14036 | -2.08464 | H  | 4.099522 | -3.14089 | -2.08287 |
| H  | -1.78847 | -2.37855 | 3.946535 | H  | -1.78727 | -2.3772  | 3.94891  |
| H  | -3.15004 | -1.2512  | 3.814719 | H  | -3.14975 | -1.25082 | 3.816761 |
| H  | -1.73178 | -0.85073 | 4.862834 | H  | -1.73185 | -0.84957 | 4.865493 |
| H  | 1.184898 | -0.75402 | 2.345166 | H  | 1.183695 | -0.75101 | 2.343935 |
| H  | 2.374524 | -1.75989 | 1.60642  | H  | 2.376146 | -1.75878 | 1.605991 |
| H  | -3.44518 | -3.44523 | -2.56172 | H  | -3.44639 | -3.44543 | -2.56036 |
| H  | -4.6901  | -3.96451 | -1.37076 | H  | -4.69178 | -3.96384 | -1.37049 |
| H  | -2.94073 | -4.06716 | -0.98124 | H  | -2.94197 | -4.06692 | -0.97978 |
| H  | -4.63825 | 0.500308 | 0.072971 | H  | -4.63924 | 0.50059  | 0.073722 |
| H  | -5.62533 | 3.114922 | 0.257608 | H  | -5.62549 | 3.115507 | 0.255467 |
| H  | -3.53543 | 4.585793 | 0.106725 | H  | -3.53486 | 4.585794 | 0.106343 |
| H  | -1.40047 | 3.200577 | -0.13789 | H  | -1.40018 | 3.199861 | -0.13706 |
| H  | 1.896994 | 2.863694 | 1.12622  | H  | 1.897201 | 2.863139 | 1.13095  |
| H  | 4.141779 | 4.097659 | 1.217176 | H  | 4.142416 | 4.097587 | 1.220894 |
| H  | 6.056238 | 2.680899 | 0.270598 | H  | 6.055729 | 2.68239  | 0.268193 |
| H  | 4.834571 | 0.303284 | -0.4964  | H  | 4.833452 | 0.305977 | -0.5003  |
| H  | 0.387727 | -1.98815 | -1.01964 | H  | 0.387608 | -1.98987 | -1.02196 |
| H  | 0.074819 | 0.670628 | 1.598928 | H  | 0.07834  | 0.677    | 1.600615 |

**Table S16.** BP86/TZP-optimized coordinate for model  ${}^2\text{Fe}^1_1$ . The broken-symmetry structure is on the left, ferromagnetic on the right.

|    |          |          |          |    |          |          |          |
|----|----------|----------|----------|----|----------|----------|----------|
| C  | 2.885516 | 2.587436 | 0.809773 | C  | 2.887031 | 2.580934 | 0.816418 |
| N  | 3.094438 | 1.405066 | 0.232817 | N  | 3.09844  | 1.404143 | 0.228864 |
| C  | 4.45301  | 1.319241 | -0.02934 | C  | 4.456029 | 1.324716 | -0.03878 |
| C  | 5.0656   | 2.469024 | 0.396196 | C  | 5.066142 | 2.47303  | 0.394084 |
| N  | 4.057272 | 3.256564 | 0.92186  | N  | 4.057257 | 3.252534 | 0.930635 |
| Fe | 1.69639  | -0.15247 | -0.08636 | Fe | 1.695556 | -0.15271 | -0.08833 |
| O  | 1.346647 | 0.515495 | -1.97785 | O  | 1.341605 | 0.513365 | -1.97899 |
| C  | 0.231548 | 0.80108  | -2.51506 | C  | 0.22796  | 0.802362 | -2.51782 |
| C  | 0.237501 | 1.341041 | -3.92468 | C  | 0.238077 | 1.341924 | -3.92747 |
| Mn | -1.37311 | -0.1042  | -0.21022 | Mn | -1.37421 | -0.10304 | -0.21245 |
| O  | -2.03388 | -0.76153 | 1.463105 | O  | -2.03019 | -0.76279 | 1.462553 |
| C  | -1.50758 | -0.66236 | 2.653373 | C  | -1.50533 | -0.66533 | 2.655115 |
| O  | -0.44596 | -0.0312  | 2.909651 | O  | -0.44358 | -0.03772 | 2.914723 |
| O  | 2.956379 | -1.50781 | -0.67654 | O  | 2.962676 | -1.50801 | -0.67231 |
| C  | 3.360766 | -2.63736 | -0.12109 | C  | 3.36274  | -2.6392  | -0.11647 |
| C  | 4.2707   | -3.49021 | -0.96825 | C  | 4.273169 | -3.49355 | -0.96228 |
| O  | 1.976713 | -0.83897 | 1.849311 | O  | 1.977712 | -0.83791 | 1.852405 |
| O  | 0.01835  | -1.40458 | -0.28341 | O  | 0.018107 | -1.40395 | -0.29194 |
| O  | 0.031803 | 0.928121 | 0.581783 | O  | 0.033329 | 0.942999 | 0.58448  |
| N  | -2.68246 | 1.445882 | -0.03984 | N  | -2.68289 | 1.447271 | -0.03678 |
| C  | -2.33314 | 2.733202 | -0.04986 | C  | -2.33327 | 2.734815 | -0.05072 |
| N  | -3.44378 | 3.496363 | 0.05315  | N  | -3.44422 | 3.497514 | 0.048684 |
| C  | -4.54766 | 2.664246 | 0.134875 | C  | -4.54829 | 2.665302 | 0.132297 |
| C  | -4.06313 | 1.384272 | 0.077246 | C  | -4.06374 | 1.385143 | 0.079402 |
| O  | -2.49431 | -1.28388 | -1.1303  | O  | -2.4999  | -1.28263 | -1.13252 |
| C  | -3.59975 | -1.9941  | -0.80548 | C  | -3.59976 | -1.99659 | -0.80304 |
| C  | -3.641   | -3.33625 | -1.50612 | C  | -3.64619 | -3.33355 | -1.51333 |
| O  | -0.92605 | 0.651141 | -1.97136 | O  | -0.92964 | 0.653434 | -1.97418 |
| O  | -4.47799 | -1.60339 | -0.04764 | O  | -4.47081 | -1.61351 | -0.0336  |
| O  | 3.047484 | -2.97897 | 1.038712 | O  | 3.046268 | -2.98206 | 1.041751 |
| C  | -2.25837 | -1.3901  | 3.738828 | C  | -2.26273 | -1.39018 | 3.738477 |
| H  | -0.69039 | 1.879326 | -4.14169 | H  | -0.68755 | 1.881857 | -4.14954 |
| H  | 0.315478 | 0.488769 | -4.61609 | H  | 0.317896 | 0.488496 | -4.61731 |
| H  | 1.114985 | 1.979289 | -4.07786 | H  | 1.117845 | 1.977873 | -4.07741 |
| H  | 5.310509 | -3.19192 | -0.76399 | H  | 5.312906 | -3.19393 | -0.75982 |
| H  | 4.163167 | -4.54403 | -0.68966 | H  | 4.166189 | -4.54624 | -0.67994 |
| H  | 4.074467 | -3.33856 | -2.03545 | H  | 4.076907 | -3.34616 | -2.03005 |
| H  | -1.9365  | -2.44253 | 3.731317 | H  | -1.93964 | -2.44241 | 3.738432 |
| H  | -3.33704 | -1.36957 | 3.547638 | H  | -3.34038 | -1.37155 | 3.541958 |
| H  | -2.01615 | -0.95546 | 4.714039 | H  | -2.02542 | -0.95092 | 4.712895 |
| H  | 1.163281 | -0.85178 | 2.407663 | H  | 1.160306 | -0.84815 | 2.405516 |
| H  | 2.33895  | -1.80037 | 1.684711 | H  | 2.338264 | -1.79942 | 1.689638 |
| H  | -3.33807 | -3.23918 | -2.55603 | H  | -3.35038 | -3.23183 | -2.56492 |
| H  | -4.64705 | -3.76016 | -1.4303  | H  | -4.65241 | -3.75623 | -1.43301 |
| H  | -2.92748 | -4.01266 | -1.01184 | H  | -2.93075 | -4.01493 | -1.02865 |

|   |          |          |          |   |          |          |          |
|---|----------|----------|----------|---|----------|----------|----------|
| H | -4.56907 | 0.423396 | 0.113126 | H | -4.57032 | 0.424819 | 0.11686  |
| H | -5.5562  | 3.04679  | 0.229091 | H | -5.55709 | 3.048312 | 0.221769 |
| H | -3.4583  | 4.510787 | 0.077715 | H | -3.45905 | 4.512068 | 0.0696   |
| H | -1.32377 | 3.114516 | -0.1228  | H | -1.32388 | 3.115437 | -0.12422 |
| H | 1.930497 | 2.965348 | 1.15309  | H | 1.932012 | 2.953015 | 1.165473 |
| H | 4.174055 | 4.177642 | 1.332657 | H | 4.172023 | 4.170331 | 1.348893 |
| H | 6.100557 | 2.787207 | 0.376958 | H | 6.099856 | 2.794851 | 0.373201 |
| H | 4.885311 | 0.443643 | -0.49793 | H | 4.890115 | 0.45494  | -0.51564 |
| H | -0.13593 | -2.02242 | -1.02605 | H | -0.12622 | -2.02179 | -1.03609 |
| H | -0.09329 | 0.685607 | 1.577078 | H | -0.09245 | 0.702272 | 1.576479 |

**Table S17.** BP86/TZP-optimized coordinate for model  ${}^1\text{Mn}^1_0$ . The broken-symmetry structure is on the left, ferromagnetic on the right.

|    |          |          |          |    |          |          |          |
|----|----------|----------|----------|----|----------|----------|----------|
| C  | -2.977   | -2.52088 | 0.139479 | C  | -2.99056 | -2.5243  | 0.124651 |
| N  | -3.22641 | -1.16041 | 0.178516 | N  | -3.22583 | -1.16316 | 0.19128  |
| C  | -4.5357  | -0.99769 | 0.117706 | C  | -4.53286 | -0.98349 | 0.132274 |
| N  | -5.15824 | -2.20929 | 0.039565 | N  | -5.16797 | -2.18646 | 0.027278 |
| C  | -4.1733  | -3.19102 | 0.053086 | C  | -4.19393 | -3.17938 | 0.022678 |
| Fe | -1.70553 | 0.454641 | 0.354039 | Fe | -1.70868 | 0.448614 | 0.36292  |
| O  | -2.10288 | 0.78292  | -1.78133 | O  | -2.10724 | 0.782077 | -1.77252 |
| C  | -2.39749 | 1.91896  | -2.25213 | C  | -2.38741 | 1.918233 | -2.24947 |
| C  | -2.72754 | 1.980693 | -3.74537 | C  | -2.68365 | 1.983279 | -3.749   |
| O  | -2.43708 | 3.043501 | -1.63807 | O  | -2.43205 | 3.04153  | -1.63296 |
| Mn | -2.14494 | 3.245218 | 0.408791 | Mn | -2.15289 | 3.251846 | 0.404702 |
| O  | -3.07424 | 1.768446 | 0.682009 | O  | -3.13209 | 1.762813 | 0.692265 |
| N  | -3.85415 | 4.456145 | 0.334663 | N  | -3.85801 | 4.466728 | 0.321363 |
| C  | -5.04835 | 4.029705 | 0.703662 | C  | -5.04739 | 4.030324 | 0.693    |
| N  | -5.92657 | 5.071636 | 0.722377 | N  | -5.93651 | 5.062961 | 0.696909 |
| C  | -5.23873 | 6.218081 | 0.348816 | C  | -5.2616  | 6.212887 | 0.309636 |
| C  | -3.9478  | 5.811805 | 0.110991 | C  | -3.96556 | 5.818296 | 0.079888 |
| O  | -1.0924  | 4.906969 | -0.14047 | O  | -1.09366 | 4.913515 | -0.14149 |
| C  | 0.056443 | 4.891217 | -0.73634 | C  | 0.053255 | 4.890649 | -0.73967 |
| O  | 0.741741 | 3.881129 | -1.03283 | O  | 0.729733 | 3.874749 | -1.03741 |
| O  | -1.97919 | 3.71628  | 2.147886 | O  | -2.00502 | 3.712335 | 2.144055 |
| O  | -0.60681 | 2.147527 | 0.35838  | O  | -0.62238 | 2.154912 | 0.377667 |
| O  | -1.31062 | -0.09771 | 2.261896 | O  | -1.30537 | -0.12552 | 2.271292 |
| C  | -1.60474 | 0.409605 | 3.418601 | C  | -1.54141 | 0.386983 | 3.43798  |
| C  | -1.03847 | -0.38394 | 4.603737 | C  | -1.03786 | -0.46923 | 4.608265 |
| O  | -0.32027 | -0.83612 | -0.29947 | O  | -0.32369 | -0.81488 | -0.30166 |
| C  | 0.466532 | -1.83656 | -0.04534 | C  | 0.45742  | -1.8194  | -0.04124 |
| O  | 0.104485 | -3.01313 | 0.172459 | O  | 0.087544 | -2.99529 | 0.1617   |
| O  | -2.24949 | 1.452888 | 3.663475 | O  | -2.0891  | 1.479384 | 3.703962 |
| C  | 0.591171 | 6.279814 | -1.09702 | C  | 0.595982 | 6.276237 | -1.10257 |
| C  | 1.956556 | -1.48394 | -0.07271 | C  | 1.946639 | -1.46763 | -0.04373 |
| H  | -3.23222 | 1.058381 | -4.05846 | H  | -3.17259 | 1.058003 | -4.07749 |
| H  | -1.78597 | 2.059161 | -4.3078  | H  | -1.72864 | 2.071901 | -4.28697 |
| H  | -3.34225 | 2.859896 | -3.97324 | H  | -3.29927 | 2.858522 | -3.98926 |

|   |          |          |          |   |          |          |          |
|---|----------|----------|----------|---|----------|----------|----------|
| H | 0.569043 | 6.929813 | -0.21127 | H | 0.573077 | 6.92964  | -0.21927 |
| H | 1.613007 | 6.207269 | -1.48594 | H | 1.618799 | 6.199716 | -1.48808 |
| H | -0.05938 | 6.734335 | -1.85899 | H | -0.05012 | 6.730745 | -1.86828 |
| H | -0.03263 | 0.007602 | 4.819409 | H | -0.0186  | -0.1356  | 4.856174 |
| H | -0.94492 | -1.44994 | 4.363787 | H | -0.99478 | -1.53147 | 4.339721 |
| H | -1.66216 | -0.23154 | 5.493616 | H | -1.66931 | -0.30964 | 5.491449 |
| H | -2.12197 | 2.873009 | 2.6739   | H | -2.07115 | 2.859569 | 2.674703 |
| H | 2.216349 | -1.06999 | -1.05773 | H | 2.21839  | -1.0446  | -1.02165 |
| H | 2.568727 | -2.36979 | 0.136257 | H | 2.556679 | -2.35451 | 0.165546 |
| H | 2.159263 | -0.69838 | 0.66829  | H | 2.137745 | -0.68801 | 0.706601 |
| H | -1.94745 | -2.89173 | 0.165835 | H | -1.9646  | -2.90425 | 0.144761 |
| H | -4.41413 | -4.24658 | 0.002766 | H | -4.44596 | -4.23064 | -0.05205 |
| H | -6.15772 | -2.36256 | -0.02068 | H | -6.16859 | -2.32812 | -0.03644 |
| H | -5.04594 | -0.04218 | 0.127106 | H | -5.02705 | -0.01967 | 0.161138 |
| H | -5.27195 | 3.005911 | 0.978233 | H | -5.25146 | 3.004375 | 0.977158 |
| H | -6.90078 | 5.018495 | 0.993256 | H | -6.91123 | 5.00178  | 0.96348  |
| H | -5.71753 | 7.188161 | 0.296742 | H | -5.75171 | 7.17652  | 0.242941 |
| H | -3.07168 | 6.377998 | -0.1827  | H | -3.09682 | 6.391961 | -0.22072 |
| H | 0.013981 | 2.630397 | -0.28477 | H | -0.00544 | 2.620322 | -0.28286 |

**Table S18.** BP86/TZP-optimized coordinate for model  $^1\text{Fe}^1_0$ . The broken-symmetry structure is on the left, ferromagnetic on the right.

|    |          |          |          |    |          |          |          |
|----|----------|----------|----------|----|----------|----------|----------|
| C  | -3.03788 | -2.68923 | 0.194695 | C  | -3.0441  | -2.67812 | 0.212313 |
| N  | -3.22992 | -1.38797 | 0.089851 | N  | -3.23755 | -1.37671 | 0.105735 |
| C  | -4.58735 | -1.19169 | -0.03989 | C  | -4.59275 | -1.18354 | -0.04921 |
| C  | -5.23282 | -2.4063  | -0.01809 | C  | -5.23593 | -2.39938 | -0.03888 |
| N  | -4.22929 | -3.35349 | 0.128116 | N  | -4.23287 | -3.34451 | 0.124782 |
| Fe | -1.61951 | 0.107211 | 0.566349 | Fe | -1.62872 | 0.107629 | 0.586357 |
| O  | -1.63163 | 0.179512 | -1.78008 | O  | -1.62571 | 0.167877 | -1.79712 |
| C  | -0.5699  | 0.274338 | -2.43455 | C  | -0.56207 | 0.271604 | -2.44362 |
| C  | -0.6559  | 0.319013 | -3.96097 | C  | -0.63552 | 0.328988 | -3.97083 |
| Mn | 1.169735 | 0.183499 | -0.08351 | Mn | 1.169593 | 0.178836 | -0.08816 |
| O  | 2.045527 | 0.120848 | 1.646833 | O  | 2.039062 | 0.115842 | 1.644836 |
| C  | 1.735441 | -0.42054 | 2.796776 | C  | 1.73875  | -0.41763 | 2.801426 |
| O  | 0.7319   | -1.08388 | 3.107944 | O  | 0.737356 | -1.07634 | 3.125112 |
| O  | -2.98282 | 1.637228 | 0.273296 | O  | -2.97768 | 1.639319 | 0.287113 |
| C  | -2.7449  | 2.796688 | -0.24673 | C  | -2.73668 | 2.790731 | -0.25026 |
| C  | -3.98709 | 3.682901 | -0.40825 | C  | -3.97528 | 3.679528 | -0.41898 |
| O  | -1.83345 | -0.23958 | 2.375709 | O  | -1.8392  | -0.23459 | 2.406894 |
| O  | -0.06113 | 1.473681 | 0.528256 | O  | -0.05831 | 1.462417 | 0.515506 |
| O  | -0.07983 | -1.0086  | 0.240169 | O  | -0.07822 | -1.06639 | 0.200578 |
| N  | 2.441817 | -1.36286 | -0.70095 | N  | 2.451523 | -1.35746 | -0.70787 |
| C  | 1.99162  | -2.56449 | -1.02331 | C  | 1.993102 | -2.55726 | -1.02754 |
| N  | 3.026873 | -3.3514  | -1.42398 | N  | 3.024299 | -3.34967 | -1.42669 |
| C  | 4.194325 | -2.59993 | -1.33664 | C  | 4.196264 | -2.60471 | -1.3426  |
| C  | 3.812601 | -1.36032 | -0.88474 | C  | 3.821989 | -1.36199 | -0.89306 |
| O  | 2.523574 | 1.592495 | -0.57529 | O  | 2.499254 | 1.619751 | -0.54872 |



|   |          |          |          |   |          |          |          |
|---|----------|----------|----------|---|----------|----------|----------|
| C | 3.697823 | 2.025663 | -0.23914 | C | 3.684695 | 2.038271 | -0.23239 |
| C | 3.775446 | 3.556116 | -0.1769  | C | 3.779876 | 3.56804  | -0.17122 |
| O | 0.642089 | 0.370225 | -1.98244 | O | 0.648785 | 0.369505 | -1.98296 |
| O | 4.723175 | 1.348296 | -0.00177 | O | 4.706405 | 1.350713 | -0.01179 |
| O | -1.63445 | 3.250026 | -0.62065 | O | -1.62444 | 3.230399 | -0.63503 |
| C | 2.795839 | -0.11757 | 3.862785 | C | 2.811284 | -0.11055 | 3.854762 |
| H | 0.22288  | -0.15088 | -4.41946 | H | 0.248846 | -0.1319  | -4.4278  |
| H | -0.6825  | 1.372049 | -4.27587 | H | -0.66615 | 1.38463  | -4.27644 |
| H | -1.57994 | -0.16705 | -4.2956  | H | -1.55459 | -0.15919 | -4.31605 |
| H | -4.5797  | 3.671365 | 0.516848 | H | -4.57235 | 3.673094 | 0.503201 |
| H | -3.69804 | 4.709179 | -0.6632  | H | -3.68415 | 4.704231 | -0.67753 |
| H | -4.61797 | 3.275641 | -1.21268 | H | -4.60315 | 3.269931 | -1.22458 |
| H | 2.598055 | 0.890037 | 4.258543 | H | 2.608238 | 0.891767 | 4.261099 |
| H | 3.805095 | -0.11659 | 3.432807 | H | 3.814496 | -0.09631 | 3.411633 |
| H | 2.712853 | -0.8395  | 4.684242 | H | 2.746449 | -0.83902 | 4.671961 |
| H | -0.95349 | -0.59226 | 2.676362 | H | -0.95579 | -0.5782  | 2.707222 |
| H | 3.370982 | 3.988003 | -1.10277 | H | 3.382174 | 4.004059 | -1.09824 |
| H | 4.808229 | 3.889356 | -0.01801 | H | 4.817073 | 3.887768 | -0.01327 |
| H | 3.136928 | 3.908446 | 0.645998 | H | 3.146093 | 3.930425 | 0.650844 |
| H | 4.383626 | -0.45631 | -0.645   | H | 4.396291 | -0.46051 | -0.65413 |
| H | 5.163754 | -3.01139 | -1.59083 | H | 5.162747 | -3.02182 | -1.59891 |
| H | 2.954903 | -4.31965 | -1.71043 | H | 2.94594  | -4.31758 | -1.71251 |
| H | 0.953357 | -2.86578 | -0.95863 | H | 0.951178 | -2.84476 | -0.95312 |
| H | -2.07679 | -3.16869 | 0.340295 | H | -2.08342 | -3.15461 | 0.370691 |
| H | -4.35731 | -4.35515 | 0.206175 | H | -4.36039 | -4.34632 | 0.201133 |
| H | -6.27873 | -2.68065 | -0.08366 | H | -6.28017 | -2.67524 | -0.1229  |
| H | -4.99327 | -0.18984 | -0.12612 | H | -4.99968 | -0.18311 | -0.14473 |
| H | -0.40577 | 2.196218 | -0.08903 | H | -0.41998 | 2.173221 | -0.10868 |

**Table S19.** BP86/TZP-optimized coordinate for model  ${}^1\text{Mn}^0_0$ . The broken-symmetry structure is on the left, ferromagnetic on the right.

|    |          |          |          |    |          |          |          |
|----|----------|----------|----------|----|----------|----------|----------|
| Mn | 1.522619 | -0.28389 | -0.009   | Mn | 1.551804 | -0.28405 | -0.01792 |
| Fe | -1.17855 | -0.38785 | 0.086577 | Fe | -1.17824 | -0.39598 | 0.127235 |
| C  | 2.423965 | 2.66349  | -0.31044 | C  | 2.425118 | 2.645844 | -0.31742 |
| N  | 2.855309 | 1.421173 | -0.39042 | N  | 2.876634 | 1.410685 | -0.40178 |
| C  | 4.202757 | 1.462264 | -0.66539 | C  | 4.223332 | 1.47351  | -0.67521 |
| C  | 4.605676 | 2.77531  | -0.75401 | C  | 4.605443 | 2.793398 | -0.75982 |
| N  | 3.458905 | 3.53225  | -0.52436 | N  | 3.446122 | 3.530284 | -0.52852 |
| O  | 1.252459 | -0.16999 | -2.07742 | O  | 1.229173 | -0.1699  | -2.07081 |
| C  | 0.098499 | -0.15444 | -2.62353 | C  | 0.066527 | -0.13656 | -2.59998 |
| C  | 0.100866 | -0.11456 | -4.15928 | C  | 0.044412 | -0.08258 | -4.13515 |
| O  | -1.58288 | -0.58563 | 2.164844 | O  | -1.64661 | -0.52973 | 2.170344 |
| C  | -1.17234 | -0.0011  | 3.22919  | C  | -1.19594 | 0.01866  | 3.242137 |
| O  | -1.03853 | 1.237914 | 3.4376   | O  | -1.05201 | 1.249667 | 3.47768  |
| O  | 3.219091 | -1.31716 | -0.46772 | O  | 3.228746 | -1.32527 | -0.47393 |
| C  | 3.781889 | -2.36008 | 0.074818 | C  | 3.788678 | -2.37228 | 0.066353 |
| C  | 2.938129 | -3.16235 | 1.060715 | C  | 2.939488 | -3.17419 | 1.047369 |

|   |          |          |          |   |          |          |          |
|---|----------|----------|----------|---|----------|----------|----------|
| O | 2.089538 | -0.24332 | 1.77843  | O | 2.066424 | -0.2318  | 1.779018 |
| O | 0.322337 | -1.58048 | 0.071745 | O | 0.322338 | -1.59861 | 0.093644 |
| O | 0.221355 | 0.928411 | 0.288884 | O | 0.231522 | 0.94173  | 0.271159 |
| N | -2.6766  | 1.400296 | 0.090361 | N | -2.65292 | 1.395504 | 0.082545 |
| C | -2.53931 | 2.339531 | 1.009484 | C | -2.5188  | 2.345219 | 0.990953 |
| N | -3.46819 | 3.326086 | 0.809208 | N | -3.45504 | 3.322177 | 0.785272 |
| C | -4.23648 | 2.972768 | -0.29995 | C | -4.22651 | 2.95102  | -0.31541 |
| C | -3.72398 | 1.768378 | -0.72877 | C | -3.70738 | 1.746211 | -0.73467 |
| O | -2.80724 | -1.64347 | -0.24286 | O | -2.80413 | -1.64485 | -0.27078 |
| C | -3.78345 | -1.88823 | -1.04137 | C | -3.77743 | -1.89677 | -1.07038 |
| C | -4.20506 | -3.3789  | -1.03751 | C | -4.21379 | -3.3836  | -1.03802 |
| O | -1.04076 | -0.19278 | -2.07365 | O | -1.0631  | -0.16861 | -2.033   |
| O | -4.41495 | -1.09273 | -1.78185 | O | -4.39519 | -1.11336 | -1.83378 |
| O | 4.959959 | -2.71099 | -0.18206 | O | 4.965483 | -2.72348 | -0.18948 |
| C | -0.78042 | -0.9729  | 4.361808 | C | -0.78232 | -0.98823 | 4.33243  |
| H | -0.82197 | 0.354202 | -4.52394 | H | -0.88891 | 0.379724 | -4.48062 |
| H | 0.131156 | -1.1498  | -4.53127 | H | 0.078852 | -1.11413 | -4.51697 |
| H | 0.987081 | 0.412219 | -4.53673 | H | 0.918954 | 0.455828 | -4.52288 |
| H | 1.970345 | -3.41726 | 0.605492 | H | 1.967749 | -3.41371 | 0.591932 |
| H | 3.480687 | -4.05987 | 1.386175 | H | 3.473758 | -4.07952 | 1.364981 |
| H | 2.696074 | -2.51048 | 1.913806 | H | 2.704054 | -2.52869 | 1.906994 |
| H | 0.19809  | -1.40516 | 4.101131 | H | 0.190538 | -1.41134 | 4.038593 |
| H | -1.49946 | -1.8019  | 4.422468 | H | -1.50083 | -1.81845 | 4.380096 |
| H | -0.70017 | -0.45388 | 5.327114 | H | -0.68406 | -0.49947 | 5.311506 |
| H | 1.365326 | 0.266138 | 2.197106 | H | 1.328124 | 0.28569  | 2.162649 |
| H | -3.37169 | -3.98893 | -1.41739 | H | -3.38443 | -4.00895 | -1.40162 |
| H | -5.0967  | -3.54147 | -1.65868 | H | -5.10373 | -3.5498  | -1.6607  |
| H | -4.3972  | -3.70614 | -0.00461 | H | -4.41475 | -3.68831 | 0.000047 |
| H | -4.05147 | 1.086918 | -1.51278 | H | -4.03157 | 1.055603 | -1.51241 |
| H | -5.0534  | 3.593018 | -0.65387 | H | -5.05208 | 3.559835 | -0.66865 |
| H | -3.5974  | 4.142364 | 1.39497  | H | -3.59001 | 4.14077  | 1.366098 |
| H | -1.84278 | 2.272231 | 1.854561 | H | -1.82041 | 2.294711 | 1.833097 |
| H | 1.392079 | 2.922949 | -0.09013 | H | 1.386563 | 2.880423 | -0.09766 |
| H | 3.396609 | 4.542918 | -0.51348 | H | 3.366056 | 4.539215 | -0.51394 |
| H | 5.569333 | 3.234133 | -0.94746 | H | 5.560908 | 3.268521 | -0.95265 |
| H | 4.753788 | 0.531207 | -0.77057 | H | 4.79138  | 0.554031 | -0.78189 |

**Table S20.** BP86/TZP-optimized coordinate for model  $^1\text{Fe}^0_0$ . The broken-symmetry structure is on the left, ferromagnetic on the right.

|    |          |          |          |    |          |          |          |
|----|----------|----------|----------|----|----------|----------|----------|
| C  | -2.86439 | -2.56631 | 0.071295 | C  | -2.81253 | -2.5242  | 0.090383 |
| N  | -3.20153 | -1.29696 | -0.00257 | N  | -3.16381 | -1.25793 | 0.033955 |
| C  | -4.57464 | -1.25025 | -0.05222 | C  | -4.53574 | -1.22365 | -0.04562 |
| C  | -5.09027 | -2.52771 | -0.01455 | C  | -5.03713 | -2.50741 | -0.04339 |
| N  | -3.98092 | -3.36536 | 0.061217 | N  | -3.91943 | -3.33376 | 0.039641 |
| Fe | -1.54262 | 0.405647 | 0.488019 | Fe | -1.56109 | 0.443611 | 0.498292 |
| O  | -1.5639  | 0.406385 | -1.78314 | O  | -1.55979 | 0.408711 | -1.81638 |
| C  | -0.48842 | 0.347584 | -2.42182 | C  | -0.47852 | 0.343436 | -2.44369 |

|    |          |          |          |    |          |          |          |
|----|----------|----------|----------|----|----------|----------|----------|
| C  | -0.57843 | 0.471766 | -3.95004 | C  | -0.5481  | 0.461576 | -3.97536 |
| Mn | 1.142737 | 0.04758  | -0.0242  | Mn | 1.133035 | 0.045809 | -0.03302 |
| O  | 2.052889 | -0.13177 | 1.72646  | O  | 2.031547 | -0.12742 | 1.731373 |
| C  | 1.67526  | -0.48888 | 2.913729 | C  | 1.674083 | -0.50962 | 2.915189 |
| O  | 0.569475 | -0.89753 | 3.317098 | O  | 0.583891 | -0.96187 | 3.317609 |
| O  | -3.24551 | 1.665021 | 0.207046 | O  | -3.25785 | 1.651713 | 0.233054 |
| C  | -3.51219 | 2.858817 | -0.20354 | C  | -3.54391 | 2.840602 | -0.18787 |
| C  | -5.00508 | 3.251088 | 0.020419 | C  | -5.04434 | 3.199691 | 0.025746 |
| O  | -1.93173 | 0.118428 | 2.302409 | O  | -1.88753 | 0.137233 | 2.331069 |
| O  | 0.115276 | 1.373722 | 0.45702  | O  | 0.110394 | 1.416136 | 0.407014 |
| O  | -0.17459 | -1.09867 | 0.221903 | O  | -0.17754 | -1.11208 | 0.192375 |
| N  | 2.478618 | -1.58585 | -0.67364 | N  | 2.462927 | -1.60761 | -0.66852 |
| C  | 2.032925 | -2.79572 | -0.94274 | C  | 2.021221 | -2.8183  | -0.93942 |
| N  | 3.056169 | -3.59045 | -1.38252 | N  | 3.048511 | -3.61153 | -1.37344 |
| C  | 4.215459 | -2.81653 | -1.3805  | C  | 4.205735 | -2.83434 | -1.36809 |
| C  | 3.835617 | -1.5713  | -0.93582 | C  | 3.820426 | -1.58978 | -0.92653 |
| O  | 2.834336 | 1.210138 | -0.58873 | O  | 2.839011 | 1.183239 | -0.58466 |
| C  | 3.934538 | 1.819305 | -0.37448 | C  | 3.931312 | 1.804942 | -0.36646 |
| C  | 3.792948 | 3.324088 | -0.06816 | C  | 3.772105 | 3.308742 | -0.0671  |
| O  | 0.714363 | 0.212209 | -1.9756  | O  | 0.719189 | 0.207029 | -1.98494 |
| O  | 5.096965 | 1.320722 | -0.43511 | O  | 5.098146 | 1.316945 | -0.42178 |
| O  | -2.77063 | 3.699826 | -0.74743 | O  | -2.81399 | 3.68877  | -0.73115 |
| C  | 2.809646 | -0.33417 | 3.95224  | C  | 2.806064 | -0.32357 | 3.951557 |
| H  | 0.299435 | 0.033332 | -4.44176 | H  | 0.343467 | 0.034869 | -4.45277 |
| H  | -0.62983 | 1.540848 | -4.20277 | H  | -0.6112  | 1.529028 | -4.23301 |
| H  | -1.50364 | -0.00386 | -4.30128 | H  | -1.46074 | -0.02838 | -4.34038 |
| H  | -5.36708 | 2.875268 | 0.988576 | H  | -5.39356 | 2.844689 | 1.006351 |
| H  | -5.12438 | 4.342057 | -0.03685 | H  | -5.1943  | 4.284315 | -0.06571 |
| H  | -5.61845 | 2.791469 | -0.77225 | H  | -5.64587 | 2.696706 | -0.74918 |
| H  | 2.70362  | 0.656184 | 4.421538 | H  | 2.681502 | 0.669562 | 4.410559 |
| H  | 3.800293 | -0.3892  | 3.48376  | H  | 3.797012 | -0.36168 | 3.48139  |
| H  | 2.70099  | -1.09501 | 4.737502 | H  | 2.715193 | -1.07889 | 4.744432 |
| H  | -1.08825 | -0.24947 | 2.667375 | H  | -1.0448  | -0.25464 | 2.673785 |
| H  | 3.280133 | 3.813158 | -0.90983 | H  | 3.277205 | 3.790667 | -0.92351 |
| H  | 4.771028 | 3.796054 | 0.101963 | H  | 4.742328 | 3.788809 | 0.123647 |
| H  | 3.144044 | 3.452811 | 0.809556 | H  | 3.100029 | 3.43737  | 0.79275  |
| H  | 4.414405 | -0.65176 | -0.79225 | H  | 4.395686 | -0.66884 | -0.78104 |
| H  | 5.173907 | -3.21915 | -1.68981 | H  | 5.166462 | -3.2336  | -1.67448 |
| H  | 2.97954  | -4.55912 | -1.6661  | H  | 2.976253 | -4.5802  | -1.65828 |
| H  | 0.997619 | -3.09679 | -0.82582 | H  | 0.986109 | -3.12157 | -0.82794 |
| H  | -1.84037 | -2.91785 | 0.155569 | H  | -1.78289 | -2.85876 | 0.183747 |
| H  | -3.9997  | -4.3743  | 0.148166 | H  | -3.92758 | -4.34473 | 0.103935 |
| H  | -6.10336 | -2.91623 | -0.02591 | H  | -6.04507 | -2.90672 | -0.08639 |
| H  | -5.08285 | -0.29233 | -0.09667 | H  | -5.05391 | -0.27122 | -0.08516 |

**Table S21.** BP86/TZP-optimized coordinate for model  ${}^1\text{Mn}^1_1$ . The broken-symmetry structure is on the left, ferromagnetic on the right.

|    |          |          |          |    |          |          |          |
|----|----------|----------|----------|----|----------|----------|----------|
| C  | -2.93817 | -2.59831 | 0.179568 | C  | -2.93839 | -2.60089 | 0.180219 |
| N  | -3.147   | -1.29023 | 0.193767 | N  | -3.14632 | -1.29235 | 0.193464 |
| C  | -4.5111  | -1.08729 | 0.142874 | C  | -4.51031 | -1.08881 | 0.142579 |
| C  | -5.14049 | -2.30603 | 0.094366 | C  | -5.14055 | -2.30699 | 0.094385 |
| N  | -4.12812 | -3.2507  | 0.116948 | N  | -4.12898 | -3.25258 | 0.118972 |
| Mn | -1.64475 | 0.14288  | 0.387268 | Mn | -1.64439 | 0.142465 | 0.387152 |
| O  | -1.64979 | 0.10897  | -1.644   | O  | -1.64974 | 0.110262 | -1.64356 |
| C  | -0.63147 | 0.169373 | -2.41613 | C  | -0.63209 | 0.169767 | -2.41738 |
| C  | -0.91971 | 0.268765 | -3.90308 | C  | -0.9218  | 0.268501 | -3.90403 |
| Fe | 1.344486 | 0.286988 | -0.14399 | Fe | 1.345041 | 0.287121 | -0.14398 |
| O  | 2.05073  | 0.116383 | 1.740524 | O  | 2.051576 | 0.116012 | 1.742021 |
| C  | 1.614001 | -0.48721 | 2.791522 | C  | 1.614265 | -0.48706 | 2.792938 |
| O  | 0.568568 | -1.20294 | 2.838235 | O  | 0.567499 | -1.20166 | 2.838187 |
| O  | -3.03504 | 1.51669  | 0.223343 | O  | -3.03331 | 1.51763  | 0.223553 |
| C  | -2.83897 | 2.766991 | -0.09598 | C  | -2.83827 | 2.767974 | -0.09781 |
| C  | -4.11208 | 3.587361 | -0.19972 | C  | -4.112   | 3.587599 | -0.19956 |
| O  | -1.8991  | 0.057069 | 2.179304 | O  | -1.89614 | 0.058694 | 2.179143 |
| O  | -0.24561 | 1.377466 | 0.422092 | O  | -0.24475 | 1.379998 | 0.422363 |
| O  | -0.28373 | -1.16225 | 0.374295 | O  | -0.28408 | -1.16524 | 0.374006 |
| N  | 2.54561  | -1.44602 | -0.70666 | N  | 2.54394  | -1.44614 | -0.70677 |
| C  | 2.093223 | -2.65432 | -1.01376 | C  | 2.091722 | -2.65453 | -1.01364 |
| N  | 3.132098 | -3.47204 | -1.33052 | N  | 3.130595 | -3.47147 | -1.33169 |
| C  | 4.305018 | -2.74049 | -1.21715 | C  | 4.303497 | -2.73986 | -1.21799 |
| C  | 3.924442 | -1.48058 | -0.82834 | C  | 3.922782 | -1.48002 | -0.829   |
| O  | 2.614163 | 1.614831 | -0.63645 | O  | 2.614592 | 1.614445 | -0.63536 |
| C  | 3.795509 | 2.115827 | -0.2985  | C  | 3.795802 | 2.115726 | -0.29685 |
| C  | 3.775872 | 3.61418  | -0.05696 | C  | 3.77507  | 3.614002 | -0.05547 |
| O  | 0.588953 | 0.170221 | -2.06446 | O  | 0.588383 | 0.171902 | -2.06593 |
| O  | 4.82759  | 1.444377 | -0.21272 | O  | 4.828532 | 1.445264 | -0.21154 |
| O  | -1.72418 | 3.299627 | -0.30911 | O  | -1.72463 | 3.301046 | -0.31388 |
| C  | 2.435098 | -0.28777 | 4.050939 | C  | 2.434946 | -0.28913 | 4.053035 |
| H  | -0.13367 | -0.23567 | -4.47607 | H  | -0.13579 | -0.23582 | -4.4772  |
| H  | -0.90928 | 1.333164 | -4.17928 | H  | -0.91153 | 1.332986 | -4.1803  |
| H  | -1.90746 | -0.14169 | -4.1383  | H  | -1.90956 | -0.14191 | -4.13934 |
| H  | -4.67558 | 3.513645 | 0.740322 | H  | -4.67439 | 3.513204 | 0.741039 |
| H  | -3.87279 | 4.633232 | -0.41483 | H  | -3.87301 | 4.633943 | -0.41313 |
| H  | -4.74603 | 3.178561 | -0.99913 | H  | -4.74652 | 3.17924  | -0.99883 |
| H  | 2.296335 | 0.74581  | 4.39986  | H  | 2.296925 | 0.744655 | 4.401786 |
| H  | 3.501619 | -0.41617 | 3.827138 | H  | 3.501489 | -0.4179  | 3.82945  |
| H  | 2.114595 | -0.98085 | 4.835091 | H  | 2.11401  | -0.98183 | 4.837423 |
| H  | -1.06398 | -0.23351 | 2.620728 | H  | -1.06156 | -0.23452 | 2.620073 |
| H  | 3.365796 | 4.125822 | -0.93852 | H  | 3.365282 | 4.12506  | -0.93754 |
| H  | 4.78725  | 3.975552 | 0.156075 | H  | 4.786106 | 3.975942 | 0.158262 |
| H  | 3.108581 | 3.838376 | 0.786886 | H  | 3.107025 | 3.837858 | 0.787859 |
| H  | 4.514436 | -0.58569 | -0.63336 | H  | 4.512613 | -0.58491 | -0.63416 |
| H  | 5.276688 | -3.17398 | -1.41943 | H  | 5.275068 | -3.17307 | -1.42096 |
| H  | 3.057345 | -4.44582 | -1.60101 | H  | 3.056594 | -4.44499 | -1.60292 |
| H  | 1.052819 | -2.95298 | -1.00985 | H  | 1.051174 | -2.95336 | -1.00879 |
| H  | -1.96581 | -3.07187 | 0.224877 | H  | -1.96632 | -3.07481 | 0.225278 |
| H  | -4.24747 | -4.25692 | 0.1049   | H  | -4.24922 | -4.25871 | 0.107862 |

|   |          |          |          |   |          |          |          |
|---|----------|----------|----------|---|----------|----------|----------|
| H | -6.18718 | -2.57879 | 0.048402 | H | -6.18753 | -2.57909 | 0.048321 |
| H | -4.9247  | -0.08684 | 0.151932 | H | -4.92338 | -0.08817 | 0.151414 |
| H | -0.67463 | 2.251259 | 0.057624 | H | -0.67233 | 2.254555 | 0.060794 |
| H | 0.009478 | -1.29364 | 1.346913 | H | 0.008783 | -1.2978  | 1.346265 |

**Table S22.** BP86/TZP-optimized coordinate for model  ${}^1\text{Fe}^1_1$ . The broken-symmetry structure is on the left, ferromagnetic on the right.

|    |          |          |          |    |          |          |          |
|----|----------|----------|----------|----|----------|----------|----------|
| C  | -3.00729 | -2.67496 | 0.169173 | C  | -3.00878 | -2.67661 | 0.170638 |
| N  | -3.19486 | -1.36524 | 0.179391 | N  | -3.19764 | -1.36676 | 0.180889 |
| C  | -4.55881 | -1.15307 | 0.098213 | C  | -4.5605  | -1.15497 | 0.098058 |
| C  | -5.20355 | -2.36386 | 0.037944 | C  | -5.20472 | -2.36568 | 0.035495 |
| N  | -4.20301 | -3.32015 | 0.081842 | N  | -4.20402 | -3.32199 | 0.080675 |
| Fe | -1.7109  | 0.176369 | 0.569498 | Fe | -1.7116  | 0.174861 | 0.572581 |
| O  | -1.62876 | 0.168822 | -1.6752  | O  | -1.63021 | 0.160881 | -1.67808 |
| C  | -0.60552 | 0.206435 | -2.39337 | C  | -0.60708 | 0.202755 | -2.39467 |
| C  | -0.7507  | 0.28109  | -3.90201 | C  | -0.75004 | 0.280569 | -3.9041  |
| Mn | 1.235777 | 0.202496 | -0.14909 | Mn | 1.235032 | 0.203296 | -0.14997 |
| O  | 2.074849 | 0.167796 | 1.599985 | O  | 2.07442  | 0.169127 | 1.599369 |
| C  | 1.748257 | -0.50707 | 2.661668 | C  | 1.748466 | -0.50608 | 2.662241 |
| O  | 0.82802  | -1.36356 | 2.727974 | O  | 0.829131 | -1.36347 | 2.728587 |
| O  | -3.02821 | 1.635094 | 0.257652 | O  | -3.0212  | 1.643173 | 0.265181 |
| C  | -2.7404  | 2.803004 | -0.23288 | C  | -2.73283 | 2.809691 | -0.23247 |
| C  | -3.93568 | 3.725657 | -0.40524 | C  | -3.93003 | 3.730197 | -0.40788 |
| O  | -1.81923 | 0.003049 | 2.413789 | O  | -1.82011 | -0.00565 | 2.417118 |
| O  | -0.04572 | 1.410748 | 0.443211 | O  | -0.04955 | 1.410919 | 0.440899 |
| O  | -0.06115 | -1.14041 | 0.315343 | O  | -0.0595  | -1.14199 | 0.313199 |
| N  | 2.508168 | -1.35977 | -0.70101 | N  | 2.508114 | -1.35963 | -0.70006 |
| C  | 2.058581 | -2.56488 | -1.03442 | C  | 2.05932  | -2.56471 | -1.03501 |
| N  | 3.101721 | -3.36547 | -1.36378 | N  | 3.103209 | -3.36344 | -1.36605 |
| C  | 4.2721   | -2.63318 | -1.22902 | C  | 4.272859 | -2.63035 | -1.23065 |
| C  | 3.888272 | -1.38195 | -0.81744 | C  | 3.888434 | -1.38076 | -0.81556 |
| O  | 2.457796 | 1.570643 | -0.666   | O  | 2.45433  | 1.572215 | -0.66479 |
| C  | 3.607748 | 2.040386 | -0.198   | C  | 3.605345 | 2.041429 | -0.19517 |
| C  | 3.643614 | 3.559327 | -0.1545  | C  | 3.642396 | 3.560453 | -0.15598 |
| O  | 0.631745 | 0.208829 | -1.98536 | O  | 0.630569 | 0.209438 | -1.98561 |
| O  | 4.577728 | 1.362362 | 0.152246 | O  | 4.571985 | 1.35969  | 0.156278 |
| O  | -1.59091 | 3.199054 | -0.55178 | O  | -1.58474 | 3.202872 | -0.56078 |
| C  | 2.577637 | -0.17465 | 3.884035 | C  | 2.579766 | -0.17339 | 3.883763 |
| H  | 0.088433 | -0.21441 | -4.40327 | H  | 0.089384 | -0.21294 | -4.40662 |
| H  | -0.74238 | 1.341219 | -4.19402 | H  | -0.74193 | 1.341439 | -4.19313 |
| H  | -1.70749 | -0.15564 | -4.20744 | H  | -1.70652 | -0.1557  | -4.21076 |
| H  | -4.5176  | 3.745486 | 0.525682 | H  | -4.51437 | 3.751549 | 0.521862 |
| H  | -3.61389 | 4.735917 | -0.6742  | H  | -3.61037 | 4.740778 | -0.67985 |
| H  | -4.59091 | 3.325372 | -1.1927  | H  | -4.58275 | 3.32583  | -1.19543 |
| H  | 2.376388 | 0.865547 | 4.175465 | H  | 2.37904  | 0.866793 | 4.176464 |
| H  | 3.645553 | -0.24548 | 3.641406 | H  | 3.647673 | -0.24336 | 3.639998 |
| H  | 2.319854 | -0.8474  | 4.707614 | H  | 2.323647 | -0.84684 | 4.7075   |

|   |          |          |          |   |          |          |          |
|---|----------|----------|----------|---|----------|----------|----------|
| H | -1.03366 | -0.39718 | 2.842939 | H | -1.03156 | -0.39861 | 2.847501 |
| H | 3.269675 | 3.981908 | -1.09543 | H | 3.269029 | 3.980573 | -1.09861 |
| H | 4.662268 | 3.906227 | 0.04911  | H | 4.661636 | 3.905871 | 0.046355 |
| H | 2.969374 | 3.898505 | 0.644954 | H | 2.968037 | 3.90382  | 0.641791 |
| H | 4.466875 | -0.49407 | -0.56725 | H | 4.4664   | -0.49302 | -0.56401 |
| H | 5.246944 | -3.06157 | -1.4255  | H | 5.24794  | -3.05692 | -1.42991 |
| H | 3.030256 | -4.33761 | -1.64017 | H | 3.033101 | -4.33499 | -1.64499 |
| H | 1.018431 | -2.86128 | -1.0273  | H | 1.019291 | -2.86163 | -1.02886 |
| H | -2.04792 | -3.17411 | 0.22933  | H | -2.04917 | -3.17533 | 0.232173 |
| H | -4.33457 | -4.32487 | 0.066449 | H | -4.33535 | -4.32674 | 0.064564 |
| H | -6.25225 | -2.62537 | -0.02656 | H | -6.25316 | -2.62747 | -0.03095 |
| H | -4.96635 | -0.14892 | 0.094681 | H | -4.96765 | -0.15069 | 0.094638 |
| H | -0.45726 | 2.184953 | -0.11171 | H | -0.45485 | 2.185673 | -0.1124  |
| H | 0.225197 | -1.36279 | 1.273477 | H | 0.227075 | -1.36671 | 1.271487 |

**Table S23.** B3LYP/6-311G\*-optimized coordinate for model  ${}^2\text{Mn}^1_0$ . The broken-symmetry structure is on the left, ferromagnetic on the right.

|    |          |          |          |    |          |          |          |
|----|----------|----------|----------|----|----------|----------|----------|
| Mn | 1.470934 | -0.12802 | -0.10419 | Mn | 1.479464 | -0.12387 | -0.10717 |
| Fe | -1.44537 | -0.30793 | 0.072986 | Fe | -1.44697 | -0.29325 | 0.03343  |
| C  | 3.319788 | 1.821605 | 1.246168 | C  | 3.333612 | 1.751319 | 1.324357 |
| N  | 2.865348 | 1.370623 | 0.092121 | N  | 2.895558 | 1.337271 | 0.150234 |
| C  | 3.508542 | 2.06688  | -0.90772 | C  | 3.56494  | 2.052109 | -0.81885 |
| C  | 4.368432 | 2.960203 | -0.3392  | C  | 4.425052 | 2.918539 | -0.21071 |
| N  | 4.233952 | 2.790795 | 1.026933 | N  | 4.263205 | 2.71414  | 1.147869 |
| O  | 1.203028 | 0.463891 | -1.91798 | O  | 1.229453 | 0.535703 | -1.89886 |
| C  | 0.051007 | 0.655471 | -2.46935 | C  | 0.083482 | 0.763343 | -2.44825 |
| C  | 0.112573 | 1.248432 | -3.86112 | C  | 0.158634 | 1.410715 | -3.8147  |
| O  | -1.79587 | -0.92144 | 1.892491 | O  | -1.80543 | -0.94919 | 1.83912  |
| C  | -1.22822 | -1.23957 | 2.99958  | C  | -1.25302 | -1.3205  | 2.936885 |
| O  | -0.01069 | -1.23368 | 3.233763 | O  | -0.03761 | -1.33922 | 3.181844 |
| O  | 2.884995 | -1.32093 | -0.85839 | O  | 2.876914 | -1.31749 | -0.90008 |
| C  | 3.680366 | -2.16351 | -0.28642 | C  | 3.654775 | -2.19062 | -0.35102 |
| C  | 4.594273 | -2.91293 | -1.23861 | C  | 4.564325 | -2.92262 | -1.32111 |
| O  | 1.976303 | -0.66937 | 1.699481 | O  | 1.960333 | -0.73922 | 1.677324 |
| O  | 0.209872 | -1.51388 | -0.25287 | O  | 0.198286 | -1.48099 | -0.3174  |
| O  | 0.157539 | 0.780338 | 0.516287 | O  | 0.17463  | 0.803252 | 0.539525 |
| N  | -2.62415 | 1.455398 | 0.333038 | N  | -2.61963 | 1.466607 | 0.347945 |
| C  | -2.16942 | 2.542155 | 0.927866 | C  | -2.14534 | 2.539703 | 0.95293  |
| N  | -3.14621 | 3.473455 | 0.994997 | N  | -3.11441 | 3.475677 | 1.056657 |
| C  | -4.28368 | 2.945025 | 0.406995 | C  | -4.26745 | 2.965225 | 0.483238 |
| C  | -3.94422 | 1.687776 | -0.00068 | C  | -3.94478 | 1.713485 | 0.046181 |
| O  | -2.7377  | -1.43651 | -0.73857 | O  | -2.71797 | -1.40986 | -0.82091 |
| C  | -3.77466 | -1.63293 | -1.50989 | C  | -3.81371 | -1.6032  | -1.50755 |
| C  | -3.74161 | -2.96292 | -2.24715 | C  | -3.84211 | -2.9373  | -2.2377  |
| O  | -1.04831 | 0.399941 | -1.95978 | O  | -1.02214 | 0.501688 | -1.95438 |
| O  | -4.70511 | -0.85237 | -1.63951 | O  | -4.7467  | -0.8182  | -1.57207 |
| O  | 3.73895  | -2.38594 | 0.931924 | O  | 3.701791 | -2.45405 | 0.859857 |

|   |          |          |          |   |          |          |          |
|---|----------|----------|----------|---|----------|----------|----------|
| C | -2.1902  | -1.6684  | 4.094404 | C | -2.23015 | -1.7825  | 4.004583 |
| H | -0.85527 | 1.159953 | -4.35105 | H | -0.80169 | 1.333626 | -4.3212  |
| H | 0.886253 | 0.756171 | -4.45225 | H | 0.944929 | 0.949626 | -4.41401 |
| H | 0.376954 | 2.307424 | -3.7873  | H | 0.410735 | 2.468593 | -3.695   |
| H | 5.182474 | -2.20318 | -1.82514 | H | 5.17179  | -2.20326 | -1.87552 |
| H | 5.256345 | -3.57948 | -0.68824 | H | 5.20845  | -3.62085 | -0.78902 |
| H | 3.995348 | -3.49209 | -1.94606 | H | 3.962192 | -3.46411 | -2.0551  |
| H | -2.7011  | -2.58432 | 3.786238 | H | -2.7497  | -2.67813 | 3.654148 |
| H | -2.9606  | -0.90675 | 4.234381 | H | -2.99208 | -1.01738 | 4.169772 |
| H | -1.65983 | -1.84365 | 5.029248 | H | -1.71045 | -2.00333 | 4.935724 |
| H | 1.168979 | -0.89361 | 2.267709 | H | 1.147179 | -0.97299 | 2.234037 |
| H | 2.628378 | -1.42701 | 1.631201 | H | 2.603402 | -1.50241 | 1.586379 |
| H | -2.8747  | -2.99199 | -2.9134  | H | -3.02476 | -2.9774  | -2.9632  |
| H | -4.65216 | -3.10075 | -2.82888 | H | -4.79271 | -3.07117 | -2.75235 |
| H | -3.62792 | -3.78367 | -1.53466 | H | -3.68454 | -3.75477 | -1.52982 |
| H | -4.51398 | 0.929428 | -0.52082 | H | -4.53078 | 0.967158 | -0.4728  |
| H | -5.20248 | 3.502468 | 0.333919 | H | -5.18396 | 3.529482 | 0.439753 |
| H | -3.05804 | 4.389722 | 1.402927 | H | -3.01159 | 4.383723 | 1.479228 |
| H | -1.16265 | 2.66369  | 1.293131 | H | -1.12993 | 2.645753 | 1.2989   |
| H | 3.019584 | 1.447802 | 2.210125 | H | 3.00994  | 1.356337 | 2.272081 |
| H | 4.741713 | 3.286506 | 1.741701 | H | 4.763463 | 3.184199 | 1.884914 |
| H | 5.048409 | 3.677932 | -0.76613 | H | 5.121652 | 3.638668 | -0.60555 |
| H | 3.295807 | 1.863486 | -1.94283 | H | 3.368024 | 1.880317 | -1.86278 |
| H | 0.370156 | -2.16727 | -0.94022 | H | 0.340045 | -2.11209 | -1.02896 |

**Table S24.** B3LYP/6-311G\*-optimized coordinate for model  ${}^2\text{Fe}^1_0$ . The broken-symmetry structure is on the left, ferromagnetic on the right.

|    |          |          |          |    |          |          |          |
|----|----------|----------|----------|----|----------|----------|----------|
| Fe | 1.536825 | -0.13848 | -0.10395 | Fe | 1.535383 | -0.13248 | -0.10164 |
| Mn | -1.3553  | -0.1929  | 0.046924 | Mn | -1.36055 | -0.19339 | 0.049426 |
| O  | -0.01196 | -1.48236 | -0.24492 | O  | -0.01076 | -1.46834 | -0.25375 |
| O  | 0.007587 | 0.744242 | 0.613791 | O  | 0.006399 | 0.773381 | 0.632286 |
| O  | 2.085251 | -0.72413 | 1.788266 | O  | 2.087455 | -0.7317  | 1.787441 |
| H  | 1.265052 | -0.92089 | 2.30983  | H  | 1.267404 | -0.93578 | 2.307498 |
| H  | 2.666497 | -1.52543 | 1.693415 | H  | 2.669174 | -1.53071 | 1.686007 |
| N  | 2.986653 | 1.444115 | 0.082251 | N  | 2.998306 | 1.437014 | 0.086147 |
| C  | 3.653599 | 1.69507  | 1.193907 | C  | 3.663779 | 1.684264 | 1.199391 |
| H  | 3.523959 | 1.153436 | 2.116617 | H  | 3.530522 | 1.141929 | 2.121163 |
| N  | 4.522266 | 2.710821 | 0.993233 | N  | 4.535475 | 2.698104 | 1.002016 |
| H  | 5.154645 | 3.086104 | 1.681565 | H  | 5.167062 | 3.071007 | 1.692342 |
| C  | 4.402932 | 3.127148 | -0.32036 | C  | 4.41931  | 3.117261 | -0.31093 |
| H  | 4.998953 | 3.927405 | -0.72603 | H  | 5.017683 | 3.91706  | -0.71402 |
| C  | 3.443596 | 2.328616 | -0.8717  | C  | 3.458845 | 2.32221  | -0.86533 |
| H  | 3.047305 | 2.309434 | -1.87283 | H  | 3.063128 | 2.307105 | -1.86675 |
| O  | 2.827777 | -1.44317 | -0.85396 | O  | 2.818176 | -1.43064 | -0.86754 |
| C  | 3.573472 | -2.36174 | -0.33228 | C  | 3.571452 | -2.35017 | -0.35644 |
| O  | 3.670029 | -2.59884 | 0.87949  | O  | 3.676099 | -2.59546 | 0.852332 |
| C  | 4.368488 | -3.17826 | -1.3342  | C  | 4.363662 | -3.15455 | -1.37021 |

|   |          |          |          |   |          |          |          |
|---|----------|----------|----------|---|----------|----------|----------|
| H | 3.682104 | -3.7191  | -1.99109 | H | 3.676024 | -3.68858 | -2.03128 |
| H | 4.960048 | -2.51458 | -1.96918 | H | 4.952728 | -2.48295 | -1.99919 |
| H | 5.019809 | -3.88652 | -0.82436 | H | 5.017401 | -3.86753 | -0.87021 |
| O | 1.100324 | 0.614938 | -1.98185 | O | 1.088    | 0.63906  | -1.96749 |
| C | -0.07089 | 0.799453 | -2.40898 | C | -0.08376 | 0.824324 | -2.3926  |
| O | -1.14221 | 0.515562 | -1.79444 | O | -1.15249 | 0.531301 | -1.77757 |
| C | -0.23238 | 1.42545  | -3.7769  | C | -0.25033 | 1.46098  | -3.75446 |
| H | -1.23951 | 1.269176 | -4.15873 | H | -1.26066 | 1.312468 | -4.13088 |
| H | -0.05113 | 2.501542 | -3.69608 | H | -0.06224 | 2.535353 | -3.66714 |
| H | 0.508192 | 1.015039 | -4.46436 | H | 0.483587 | 1.05145  | -4.44964 |
| O | -2.57384 | -1.48013 | -0.76565 | O | -2.58075 | -1.48181 | -0.76015 |
| C | -3.62669 | -1.55858 | -1.53025 | C | -3.60528 | -1.54356 | -1.56424 |
| O | -4.41188 | -0.65654 | -1.78867 | O | -4.35569 | -0.62484 | -1.86412 |
| C | -3.82604 | -2.9553  | -2.11077 | C | -3.82044 | -2.94312 | -2.1322  |
| H | -3.82066 | -3.70092 | -1.31242 | H | -3.87223 | -3.67506 | -1.32288 |
| H | -4.76468 | -3.00636 | -2.66113 | H | -4.73538 | -2.97606 | -2.72243 |
| H | -2.99887 | -3.19766 | -2.78442 | H | -2.97222 | -3.22126 | -2.76455 |
| N | -2.58586 | 1.415946 | 0.394193 | N | -2.59978 | 1.401287 | 0.410578 |
| C | -2.1891  | 2.408753 | 1.170761 | C | -2.21799 | 2.378963 | 1.21355  |
| H | -1.21581 | 2.471924 | 1.627793 | H | -1.25069 | 2.434913 | 1.683968 |
| N | -3.17856 | 3.31814  | 1.283173 | N | -3.21188 | 3.283203 | 1.327379 |
| H | -3.13145 | 4.168667 | 1.819876 | H | -3.17543 | 4.123354 | 1.880961 |
| C | -4.25849 | 2.878029 | 0.535601 | C | -4.27793 | 2.856331 | 0.552541 |
| H | -5.17446 | 3.439966 | 0.463823 | H | -5.19373 | 3.417909 | 0.476078 |
| C | -3.87655 | 1.689605 | -0.01444 | C | -3.88379 | 1.680305 | -0.0151  |
| H | -4.38755 | 1.004559 | -0.67676 | H | -4.38029 | 1.009892 | -0.70261 |
| C | -1.34799 | -1.26462 | 2.815433 | C | -1.33684 | -1.29394 | 2.812169 |
| O | -1.92991 | -0.85812 | 1.728129 | O | -1.91761 | -0.86589 | 1.732924 |
| O | -0.14831 | -1.26756 | 3.077958 | O | -0.13653 | -1.31061 | 3.071781 |
| C | -2.35019 | -1.7985  | 3.82879  | C | -2.34047 | -1.83507 | 3.82015  |
| H | -2.79168 | -2.7216  | 3.444606 | H | -2.79445 | -2.74578 | 3.421275 |
| H | -1.85382 | -2.00094 | 4.776673 | H | -1.8426  | -2.0601  | 4.762145 |
| H | -3.16597 | -1.08712 | 3.970667 | H | -3.14736 | -1.11701 | 3.978586 |
| H | -0.283   | -2.18824 | -0.84067 | H | -0.25828 | -2.18063 | -0.85123 |

**Table S25.** B3LYP/6-311G\*-optimized coordinate for model  ${}^2\text{Mn}^0$ . The broken-symmetry structure is on the left, ferromagnetic on the right.

|    |          |          |          |    |          |          |          |
|----|----------|----------|----------|----|----------|----------|----------|
| Mn | 1.408602 | -0.1774  | -0.00891 | Mn | 1.4547   | -0.14696 | -0.02372 |
| Fe | -1.32425 | -0.37079 | 0.231716 | Fe | -1.27498 | -0.34811 | 0.172782 |
| C  | -2.2992  | 2.569104 | -0.25062 | C  | -2.3292  | 2.599635 | 0.093664 |
| N  | -2.70156 | 1.319378 | -0.24714 | N  | -2.66033 | 1.36147  | -0.19007 |
| C  | -4.05314 | 1.320925 | -0.51661 | C  | -3.97976 | 1.369354 | -0.58873 |
| C  | -4.47117 | 2.611548 | -0.68485 | C  | -4.44937 | 2.652515 | -0.54447 |
| N  | -3.34196 | 3.39927  | -0.51104 | N  | -3.38577 | 3.428826 | -0.10633 |



|   |          |          |          |   |          |          |          |
|---|----------|----------|----------|---|----------|----------|----------|
| O | -2.78256 | -1.64356 | -0.04966 | O | -2.73181 | -1.61656 | -0.14097 |
| C | -3.61095 | -2.18084 | -0.88089 | C | -3.53584 | -2.14353 | -1.00155 |
| O | -4.70773 | -1.72025 | -1.19757 | O | -4.5559  | -1.62048 | -1.45073 |
| O | 3.042243 | -1.39864 | -0.23298 | O | 3.08714  | -1.37284 | -0.18695 |
| C | 3.659521 | -2.10359 | 0.63888  | C | 3.59675  | -2.15035 | 0.695974 |
| O | 3.605846 | -1.97128 | 1.873827 | O | 3.489686 | -2.04088 | 1.928354 |
| N | 2.815965 | 1.435232 | -0.43263 | N | 2.851977 | 1.462661 | -0.48083 |
| C | 4.005404 | 1.465267 | -1.1174  | C | 4.197531 | 1.466115 | -0.75406 |
| C | 4.548449 | 2.716622 | -1.02811 | C | 4.618017 | 2.752782 | -0.9441  |
| N | 3.654331 | 3.451646 | -0.26585 | N | 3.487682 | 3.53708  | -0.78055 |
| C | 2.625687 | 2.631505 | 0.069794 | C | 2.447301 | 2.710164 | -0.50198 |
| O | 1.936724 | 0.064138 | 1.884395 | O | 1.952105 | 0.103154 | 1.872083 |
| O | 0.263266 | -1.43945 | 0.33476  | O | 0.313103 | -1.42961 | 0.308589 |
| O | 0.11657  | 0.996243 | 0.169507 | O | 0.164883 | 1.041664 | 0.105948 |
| O | 1.189723 | -0.31089 | -1.94288 | O | 1.245894 | -0.30878 | -1.95982 |
| C | 0.055218 | -0.44595 | -2.51818 | C | 0.114729 | -0.42459 | -2.54115 |
| O | -1.0606  | -0.47437 | -1.97387 | O | -1.00567 | -0.43425 | -2.00064 |
| O | -1.81452 | -0.15853 | 2.171408 | O | -1.76922 | -0.18364 | 2.124836 |
| C | -1.27569 | 0.03436  | 3.307905 | C | -1.25518 | 0.028341 | 3.269478 |
| C | -2.26943 | 0.063505 | 4.47102  | C | -2.25145 | -0.05859 | 4.427675 |
| C | 0.134756 | -0.61625 | -4.02886 | C | 0.190893 | -0.59961 | -4.05079 |
| C | 4.530327 | -3.21483 | 0.055843 | C | 4.397114 | -3.31937 | 0.126739 |
| O | -0.06899 | 0.190157 | 3.564651 | O | -0.0681  | 0.285346 | 3.535973 |
| C | -3.13106 | -3.50645 | -1.47278 | C | -3.13573 | -3.55202 | -1.44297 |
| H | -0.83612 | -0.42103 | -4.48363 | H | -0.75677 | -0.32121 | -4.51166 |
| H | 0.427715 | -1.64643 | -4.25273 | H | 0.388412 | -1.6528  | -4.27279 |
| H | 0.896409 | 0.042111 | -4.45096 | H | 1.011069 | -0.01294 | -4.46795 |
| H | 5.111765 | -2.84333 | -0.79141 | H | 4.9906   | -3.00112 | -0.73325 |
| H | 5.192376 | -3.62818 | 0.817543 | H | 5.037636 | -3.75996 | 0.891872 |
| H | 3.880383 | -4.00958 | -0.32226 | H | 3.69501  | -4.08047 | -0.22715 |
| H | -2.73825 | -0.91984 | 4.567694 | H | -2.6103  | -1.08821 | 4.514163 |
| H | -3.06947 | 0.777654 | 4.259544 | H | -3.12385 | 0.56581  | 4.218932 |
| H | -1.77065 | 0.322853 | 5.405508 | H | -1.7867  | 0.243549 | 5.366857 |
| H | 1.135053 | 0.095797 | 2.482514 | H | 1.146014 | 0.19623  | 2.456048 |
| H | 2.530337 | -0.69615 | 2.121102 | H | 2.483739 | -0.69135 | 2.137698 |
| H | -2.22645 | -3.32117 | -2.05815 | H | -2.15602 | -3.50638 | -1.9261  |
| H | -3.89839 | -3.95354 | -2.10704 | H | -3.87119 | -3.97149 | -2.13141 |
| H | -2.85561 | -4.1979  | -0.67203 | H | -3.0283  | -4.20079 | -0.56937 |
| H | -4.58966 | 0.383828 | -0.59865 | H | -4.46204 | 0.442652 | -0.87746 |
| H | -5.43511 | 3.037363 | -0.91201 | H | -5.41059 | 3.080893 | -0.77821 |
| H | -3.30016 | 4.40281  | -0.56741 | H | -3.39739 | 4.422197 | 0.052371 |
| H | -1.27731 | 2.869291 | -0.08144 | H | -1.35299 | 2.898768 | 0.440133 |
| H | 1.7723   | 2.904454 | 0.668823 | H | 1.425878 | 3.004695 | -0.32279 |
| H | 3.75769  | 4.413065 | 0.01202  | H | 3.44423  | 4.540147 | -0.84446 |
| H | 5.456596 | 3.145306 | -1.41933 | H | 5.582492 | 3.176203 | -1.17253 |
| H | 4.373212 | 0.580156 | -1.60952 | H | 4.746341 | 0.540027 | -0.79355 |

**Table S26.** B3LYP/6-311G\*-optimized coordinate for model  ${}^2\text{Fe}^0$ . The broken-symmetry structure is on the left, ferromagnetic on the right.

|    |          |          |          |    |          |          |          |
|----|----------|----------|----------|----|----------|----------|----------|
| Fe | 1.392586 | -0.15515 | -0.08174 | Fe | 1.389706 | -0.16683 | -0.08099 |
| Mn | -1.31568 | -0.27903 | 0.097149 | Mn | -1.31382 | -0.27222 | 0.092553 |
| C  | -4.09611 | 1.350538 | 0.036257 | C  | -4.09363 | 1.34508  | 0.010428 |
| N  | -2.76068 | 1.312269 | 0.363191 | N  | -2.75425 | 1.321642 | 0.322437 |
| C  | -2.44781 | 2.465624 | 0.904592 | C  | -2.43949 | 2.491822 | 0.825481 |
| N  | -3.54055 | 3.270348 | 0.947422 | N  | -3.53503 | 3.293051 | 0.857565 |
| C  | -4.60276 | 2.568762 | 0.393915 | C  | -4.60081 | 2.571632 | 0.337408 |
| O  | -1.81401 | -0.86107 | 1.871605 | O  | -1.79946 | -0.79589 | 1.889899 |
| C  | -1.2453  | -1.22824 | 2.959491 | C  | -1.24244 | -1.13391 | 2.991927 |
| C  | -2.25485 | -1.70392 | 4.006497 | C  | -2.26136 | -1.57029 | 4.046865 |
| O  | 1.022293 | 0.590304 | -2.02811 | O  | 1.025755 | 0.507503 | -2.04682 |
| C  | -0.16269 | 0.686768 | -2.43455 | C  | -0.15761 | 0.600488 | -2.46118 |
| C  | -0.37118 | 1.210789 | -3.84704 | C  | -0.35778 | 1.081997 | -3.88931 |
| O  | -0.02111 | -1.42414 | -0.21174 | O  | -0.02637 | -1.44921 | -0.18616 |
| O  | -0.05712 | 0.877859 | 0.610757 | O  | -0.0576  | 0.915125 | 0.563564 |
| O  | 2.091451 | -0.59627 | 1.842817 | O  | 2.082703 | -0.54425 | 1.861161 |
| N  | 2.861126 | 1.571225 | 0.034495 | N  | 2.847594 | 1.566974 | -0.00867 |
| C  | 3.480495 | 1.883734 | 1.150232 | C  | 3.449604 | 1.925375 | 1.102656 |
| N  | 4.29441  | 2.954215 | 0.956223 | N  | 4.256732 | 2.995402 | 0.87988  |
| C  | 4.178574 | 3.337336 | -0.36972 | C  | 4.154806 | 3.328941 | -0.46049 |
| C  | 3.282832 | 2.464174 | -0.92144 | C  | 3.273839 | 2.428174 | -0.99119 |
| O  | 2.928526 | -1.32613 | -0.78865 | O  | 2.94137  | -1.33963 | -0.74032 |
| C  | 3.709106 | -2.17655 | -0.24415 | C  | 3.72862  | -2.16632 | -0.16871 |
| C  | 4.539282 | -3.00244 | -1.22536 | C  | 4.57271  | -3.00876 | -1.12342 |
| O  | -1.21402 | 0.403021 | -1.79092 | O  | -1.2109  | 0.343005 | -1.81063 |
| O  | -2.89125 | -1.28711 | -0.51614 | O  | -2.88764 | -1.30255 | -0.47679 |
| C  | -3.26437 | -1.83804 | -1.63032 | C  | -3.26761 | -1.89086 | -1.56958 |
| C  | -2.25537 | -2.77404 | -2.29744 | C  | -2.26162 | -2.84591 | -2.21339 |
| O  | 3.842546 | -2.38513 | 0.976981 | O  | 3.85713  | -2.34057 | 1.057986 |
| O  | -4.38298 | -1.68929 | -2.11762 | O  | -4.39027 | -1.75996 | -2.0526  |
| O  | -0.04324 | -1.25155 | 3.244973 | O  | -0.04191 | -1.15745 | 3.286652 |
| H  | 1.297762 | -0.84411 | 2.38377  | H  | 1.290575 | -0.77799 | 2.412175 |
| H  | 2.721552 | -1.35459 | 1.748093 | H  | 2.72009  | -1.29916 | 1.795255 |
| H  | 3.355793 | 1.345895 | 2.076964 | H  | 3.317462 | 1.420181 | 2.046547 |
| H  | 4.883484 | 3.381159 | 1.651423 | H  | 4.83279  | 3.452859 | 1.566506 |
| H  | 4.731964 | 4.167759 | -0.77727 | H  | 4.706134 | 4.148984 | -0.89118 |
| H  | 2.904871 | 2.398945 | -1.92867 | H  | 2.909176 | 2.323295 | -1.99996 |
| H  | 3.87147  | -3.64474 | -1.80657 | H  | 3.915467 | -3.67951 | -1.68426 |
| H  | 5.046007 | -2.34278 | -1.93449 | H  | 5.069608 | -2.36383 | -1.85265 |
| H  | 5.267931 | -3.61984 | -0.69884 | H  | 5.310079 | -3.59823 | -0.5774  |
| H  | -1.41173 | 1.11034  | -4.15161 | H  | -1.39944 | 0.98566  | -4.19152 |
| H  | -0.0827  | 2.265727 | -3.88594 | H  | -0.05557 | 2.131326 | -3.96167 |
| H  | 0.277917 | 0.667748 | -4.53726 | H  | 0.284205 | 0.508767 | -4.56152 |
| H  | -2.50797 | -3.80383 | -2.01949 | H  | -2.51388 | -3.86719 | -1.90534 |
| H  | -2.33941 | -2.69861 | -3.38433 | H  | -2.3503  | -2.80156 | -3.30167 |

|   |          |          |          |   |          |          |          |
|---|----------|----------|----------|---|----------|----------|----------|
| H | -1.23661 | -2.57477 | -1.96655 | H | -1.24168 | -2.63753 | -1.89192 |
| H | -1.45434 | 2.712445 | 1.245536 | H | -1.4428  | 2.751368 | 1.146996 |
| H | -3.57102 | 4.205496 | 1.317005 | H | -3.56481 | 4.238637 | 1.1996   |
| H | -5.5884  | 2.996761 | 0.308788 | H | -5.58905 | 2.993304 | 0.25104  |
| H | -4.55662 | 0.49495  | -0.43524 | H | -4.55623 | 0.474107 | -0.42973 |
| H | -2.7105  | -2.63742 | 3.665035 | H | -2.71863 | -2.51268 | 3.732994 |
| H | -1.76181 | -1.86946 | 4.964848 | H | -1.77629 | -1.70638 | 5.013926 |
| H | -3.06093 | -0.97466 | 4.114517 | H | -3.06507 | -0.83461 | 4.12469  |

**Table S27.** B3LYP/6-311G\*-optimized coordinate for model  ${}^2\text{Mn}^1_1$ . The broken-symmetry structure is on the left, ferromagnetic on the right.

|    |          |          |          |    |          |          |          |
|----|----------|----------|----------|----|----------|----------|----------|
| Mn | 1.577312 | -0.15875 | -0.07293 | C  | 2.835695 | 2.490587 | 0.733592 |
| Fe | -1.55774 | -0.19351 | -0.2171  | N  | 3.055178 | 1.272434 | 0.260603 |
| C  | 3.563501 | 1.506225 | 1.478356 | C  | 4.40794  | 1.163654 | 0.004101 |
| N  | 3.078373 | 1.172507 | 0.289341 | C  | 5.009411 | 2.339127 | 0.339845 |
| C  | 3.797023 | 1.872659 | -0.66183 | N  | 3.999884 | 3.161874 | 0.798048 |
| C  | 4.725585 | 2.641052 | -0.02699 | Mn | 1.631606 | -0.1401  | -0.03766 |
| N  | 4.55933  | 2.396005 | 1.321963 | O  | 1.464971 | 0.513474 | -1.80236 |
| O  | 1.40044  | 0.630768 | -1.77735 | C  | 0.376369 | 0.753462 | -2.46025 |
| C  | 0.301454 | 0.917365 | -2.4099  | C  | 0.588101 | 1.224905 | -3.87474 |
| C  | 0.506781 | 1.555542 | -3.75853 | Fe | -1.50727 | -0.20612 | -0.23148 |
| O  | -1.95744 | -0.83654 | 1.587287 | O  | -1.90532 | -0.692   | 1.623755 |
| C  | -1.4195  | -0.83542 | 2.749625 | C  | -1.37997 | -0.57878 | 2.786194 |
| O  | -0.29187 | -0.33906 | 2.993328 | O  | -0.27854 | -0.01178 | 2.996285 |
| O  | 2.818325 | -1.39056 | -0.80742 | O  | 2.922566 | -1.38644 | -0.64693 |
| C  | 3.490604 | -2.38312 | -0.26221 | C  | 3.348169 | -2.52295 | -0.11998 |
| C  | 4.382361 | -3.11949 | -1.22637 | C  | 4.268245 | -3.30576 | -1.02009 |
| O  | 1.927291 | -0.82669 | 1.726427 | O  | 1.95334  | -0.74829 | 1.793873 |
| O  | 0.176949 | -1.35137 | -0.36442 | O  | 0.22739  | -1.34817 | -0.27185 |
| O  | 0.217942 | 0.895943 | 0.617392 | O  | 0.28364  | 0.977872 | 0.568027 |
| N  | -2.72051 | 1.532018 | 0.068782 | N  | -2.74258 | 1.489846 | -0.09539 |
| C  | -2.28486 | 2.775126 | 0.213633 | C  | -2.39945 | 2.762526 | -0.22296 |
| N  | -3.32854 | 3.606004 | 0.399343 | N  | -3.48127 | 3.547958 | -0.058   |
| C  | -4.49094 | 2.85786  | 0.371622 | C  | -4.57385 | 2.736636 | 0.18603  |
| C  | -4.10167 | 1.567868 | 0.166646 | C  | -4.10347 | 1.457873 | 0.162017 |
| O  | -2.64017 | -1.36103 | -1.15059 | O  | -2.55011 | -1.47631 | -1.07608 |
| C  | -3.85411 | -1.91965 | -1.09752 | C  | -3.73642 | -2.07293 | -0.9072  |
| C  | -3.93117 | -3.24808 | -1.81134 | C  | -3.84174 | -3.39727 | -1.62523 |
| O  | -0.83874 | 0.706574 | -1.97821 | O  | -0.77336 | 0.603671 | -2.01532 |
| O  | -4.79419 | -1.3973  | -0.5413  | O  | -4.63203 | -1.58654 | -0.2538  |
| O  | 3.415347 | -2.69664 | 0.925743 | O  | 3.045356 | -2.9119  | 1.003796 |
| C  | -2.21844 | -1.4846  | 3.849875 | C  | -2.15147 | -1.18579 | 3.928463 |
| H  | -0.4459  | 1.655806 | -4.27356 | H  | -0.32078 | 1.685649 | -4.25671 |
| H  | 1.197663 | 0.957642 | -4.35534 | H  | 0.830419 | 0.360003 | -4.49893 |
| H  | 0.957288 | 2.543173 | -3.6298  | H  | 1.429359 | 1.915434 | -3.93196 |
| H  | 5.127547 | -2.43361 | -1.63589 | H  | 5.231051 | -2.79197 | -1.09118 |
| H  | 4.878794 | -3.94433 | -0.71976 | H  | 4.428903 | -4.30104 | -0.61076 |

|   |          |          |          |   |          |          |          |
|---|----------|----------|----------|---|----------|----------|----------|
| H | 3.796714 | -3.49572 | -2.06778 | H | 3.860726 | -3.36749 | -2.03008 |
| H | -2.23027 | -2.56669 | 3.690888 | H | -2.03908 | -2.27357 | 3.892763 |
| H | -3.25531 | -1.14773 | 3.810668 | H | -3.21553 | -0.97203 | 3.823424 |
| H | -1.78222 | -1.27026 | 4.82336  | H | -1.77647 | -0.82326 | 4.883554 |
| H | 1.131557 | -0.87697 | 2.317374 | H | 1.192051 | -0.64453 | 2.414948 |
| H | 2.474791 | -1.67618 | 1.655916 | H | 2.316969 | -1.6825  | 1.757442 |
| H | -3.616   | -3.13315 | -2.85103 | H | -3.63098 | -3.26425 | -2.68882 |
| H | -4.94715 | -3.63612 | -1.77417 | H | -4.83743 | -3.81661 | -1.49507 |
| H | -3.24961 | -3.96272 | -1.34265 | H | -3.09747 | -4.09469 | -1.23208 |
| H | -4.68175 | 0.662411 | 0.069214 | H | -4.6167  | 0.515718 | 0.279401 |
| H | -5.46371 | 3.303269 | 0.494653 | H | -5.56149 | 3.135615 | 0.34456  |
| H | -3.26895 | 4.603164 | 0.535671 | H | -3.49137 | 4.554789 | -0.10952 |
| H | -1.25192 | 3.08089  | 0.199335 | H | -1.40674 | 3.126914 | -0.42616 |
| H | 3.228886 | 1.112339 | 2.422061 | H | 1.875778 | 2.879713 | 1.025824 |
| H | 5.098942 | 2.803311 | 2.070911 | H | 4.112613 | 4.105303 | 1.136946 |
| H | 5.473321 | 3.319048 | -0.40244 | H | 6.037338 | 2.656862 | 0.294157 |
| H | 3.58866  | 1.762603 | -1.71115 | H | 4.829721 | 0.264917 | -0.40916 |
| H | 0.320813 | -2.06638 | -0.9944  | H | 0.357315 | -2.14094 | -0.80292 |
| H | 0.103054 | 0.75831  | 1.585518 | H | 0.123584 | 0.868114 | 1.539699 |

**Table S28.** B3LYP/6-311G\*-optimized coordinate for model  ${}^2\text{Fe}^1$ . The broken-symmetry structure is on the left, ferromagnetic on the right.

|    |          |          |          |    |          |          |          |
|----|----------|----------|----------|----|----------|----------|----------|
| Fe | -1.65493 | -0.17111 | 0.148022 | Fe | -1.6565  | -0.17083 | 0.147175 |
| Mn | 1.42296  | -0.0768  | 0.21707  | Mn | 1.422746 | -0.07897 | 0.221159 |
| C  | -3.74149 | 1.340696 | -1.54358 | C  | -3.74467 | 1.338281 | -1.54302 |
| N  | -3.12156 | 1.266193 | -0.37333 | N  | -3.12361 | 1.264528 | -0.37339 |
| C  | -3.68107 | 2.236243 | 0.438735 | C  | -3.68251 | 2.234661 | 0.438928 |
| C  | -4.64634 | 2.89917  | -0.25867 | C  | -4.64896 | 2.896763 | -0.25766 |
| N  | -4.66734 | 2.317915 | -1.51137 | N  | -4.67104 | 2.315001 | -1.51008 |
| O  | -1.28298 | 0.903649 | 1.81301  | O  | -1.28347 | 0.897005 | 1.816788 |
| C  | -0.17434 | 1.269334 | 2.293522 | C  | -0.17516 | 1.260289 | 2.300282 |
| C  | -0.18615 | 2.076497 | 3.565239 | C  | -0.18791 | 2.060411 | 3.576374 |
| O  | 2.028298 | -1.05008 | -1.26773 | O  | 2.02179  | -1.04618 | -1.26807 |
| C  | 1.538711 | -1.23344 | -2.4623  | C  | 1.537981 | -1.21605 | -2.46757 |
| O  | 0.512983 | -0.69053 | -2.89128 | O  | 0.515661 | -0.66748 | -2.89634 |
| O  | -2.83997 | -1.47014 | 0.879521 | O  | -2.84119 | -1.47077 | 0.87454  |
| C  | -3.48009 | -2.52161 | 0.420813 | C  | -3.47151 | -2.52823 | 0.415041 |
| C  | -4.31194 | -3.25243 | 1.44089  | C  | -4.30542 | -3.2601  | 1.432791 |
| O  | -1.93821 | -1.0126  | -1.71968 | O  | -1.93388 | -1.01012 | -1.72396 |
| O  | 0.012925 | -1.27848 | 0.578947 | O  | 0.010106 | -1.27778 | 0.581887 |
| O  | -0.00231 | 0.790257 | -0.7101  | O  | -0.00759 | 0.80022  | -0.70122 |
| N  | 2.683161 | 1.411147 | -0.31456 | N  | 2.678604 | 1.413511 | -0.30736 |
| C  | 2.297512 | 2.668737 | -0.49176 | C  | 2.295609 | 2.674576 | -0.46504 |
| N  | 3.360077 | 3.415968 | -0.835   | N  | 3.356191 | 3.421423 | -0.81497 |

|   |          |          |          |   |          |          |          |
|---|----------|----------|----------|---|----------|----------|----------|
| C | 4.47619  | 2.60095  | -0.88234 | C | 4.468242 | 2.602624 | -0.88751 |
| C | 4.045167 | 1.350283 | -0.55803 | C | 4.036814 | 1.350091 | -0.57124 |
| O | 2.535549 | -1.0221  | 1.339202 | O | 2.537531 | -1.02897 | 1.33734  |
| C | 3.693958 | -1.69228 | 1.217935 | C | 3.697144 | -1.69538 | 1.207175 |
| C | 3.861705 | -2.71423 | 2.321324 | C | 3.875981 | -2.71718 | 2.309003 |
| O | 0.961582 | 1.01645  | 1.782676 | O | 0.96126  | 1.005734 | 1.791243 |
| O | 4.512032 | -1.49996 | 0.350516 | O | 4.508468 | -1.50033 | 0.334008 |
| O | -3.4161  | -2.88826 | -0.75304 | O | -3.39708 | -2.89919 | -0.75656 |
| C | 2.334702 | -2.20336 | -3.29725 | C | 2.337065 | -2.17918 | -3.30755 |
| H | 0.82287  | 2.245272 | 3.933754 | H | 0.822199 | 2.270634 | 3.919728 |
| H | -0.7794  | 1.555075 | 4.318795 | H | -0.7341  | 1.505937 | 4.342354 |
| H | -0.67371 | 3.036918 | 3.378576 | H | -0.72561 | 2.997522 | 3.412473 |
| H | -5.04685 | -2.57082 | 1.875314 | H | -5.04298 | -2.57989 | 1.8648   |
| H | -4.81715 | -4.09981 | 0.98236  | H | -4.80716 | -4.10883 | 0.972952 |
| H | -3.67574 | -3.59831 | 2.259071 | H | -3.67105 | -3.60462 | 2.253017 |
| H | 1.987163 | -3.21782 | -3.07877 | H | 1.984847 | -3.19493 | -3.10293 |
| H | 3.393646 | -2.15675 | -3.04731 | H | 3.394386 | -2.13875 | -3.04985 |
| H | 2.171363 | -2.00447 | -4.35534 | H | 2.181541 | -1.96818 | -4.36448 |
| H | -1.18083 | -1.128   | -2.32132 | H | -1.17506 | -1.1148  | -2.32584 |
| H | -2.47582 | -1.84872 | -1.59285 | H | -2.46229 | -1.85171 | -1.60008 |
| H | 3.69637  | -2.25391 | 3.297128 | H | 3.716685 | -2.2575  | 3.286102 |
| H | 4.860253 | -3.14442 | 2.274765 | H | 4.875311 | -3.14466 | 2.254861 |
| H | 3.120404 | -3.50944 | 2.204628 | H | 3.13587  | -3.51425 | 2.197712 |
| H | 4.57708  | 0.41696  | -0.4687  | H | 4.566692 | 0.414293 | -0.49748 |
| H | 5.453046 | 2.976288 | -1.13614 | H | 5.443099 | 2.977243 | -1.14991 |
| H | 3.339022 | 4.404878 | -1.03154 | H | 3.33637  | 4.412627 | -0.99977 |
| H | 1.288979 | 3.031615 | -0.39671 | H | 1.290075 | 3.040432 | -0.35193 |
| H | -3.541   | 0.70607  | -2.39023 | H | -3.54476 | 0.703228 | -2.3895  |
| H | -5.27798 | 2.571205 | -2.27319 | H | -5.28264 | 2.567676 | -2.27134 |
| H | -5.30631 | 3.705738 | 0.013046 | H | -5.30904 | 3.703095 | 0.014476 |
| H | -3.35171 | 2.368812 | 1.454794 | H | -3.35203 | 2.367846 | 1.454541 |
| H | 0.170038 | -1.91456 | 1.285023 | H | 0.160869 | -1.92851 | 1.275718 |
| H | 0.090568 | 0.58539  | -1.66417 | H | 0.088988 | 0.61395  | -1.65784 |

**Table S29.** B3LYP/6-311G\*-optimized coordinate for model  $^1\text{Mn}^1_0$ . The broken-symmetry structure is on the left, ferromagnetic on the right.

|    |          |          |          |    |          |          |          |
|----|----------|----------|----------|----|----------|----------|----------|
| Mn | 1.56188  | -0.16707 | 0.410958 | Mn | 1.565751 | -0.1681  | 0.41152  |
| Fe | -1.25549 | -0.26955 | -0.1062  | Fe | -1.25223 | -0.26562 | -0.11441 |
| C  | -3.64568 | 1.642135 | -1.24239 | C  | -3.65297 | 1.632844 | -1.25574 |
| N  | -2.3505  | 1.503768 | -0.79114 | N  | -2.36074 | 1.499721 | -0.79503 |
| C  | -1.79571 | 2.69556  | -0.80469 | C  | -1.81254 | 2.694745 | -0.7978  |
| N  | -2.68409 | 3.617565 | -1.25217 | N  | -2.70298 | 3.613743 | -1.24751 |
| C  | -3.87217 | 2.957826 | -1.53437 | C  | -3.88504 | 2.948687 | -1.54262 |
| O  | -0.49168 | -0.42136 | -2.12031 | O  | -0.47689 | -0.39408 | -2.12631 |
| C  | 0.716368 | -0.37973 | -2.43578 | C  | 0.732343 | -0.35076 | -2.43568 |
| C  | 1.065888 | -0.52916 | -3.91194 | C  | 1.090265 | -0.48181 | -3.91124 |
| O  | 1.709731 | -0.25345 | -1.65233 | O  | 1.72129  | -0.23689 | -1.64431 |

|   |          |          |          |   |          |          |          |
|---|----------|----------|----------|---|----------|----------|----------|
| O | 0.205825 | 0.927132 | 0.259069 | O | 0.205544 | 0.954704 | 0.264217 |
| N | 3.002382 | 1.349253 | 0.264618 | N | 3.006415 | 1.343861 | 0.283469 |
| C | 3.390352 | 2.029848 | 1.319472 | C | 3.361861 | 2.040926 | 1.339066 |
| N | 4.32546  | 2.942751 | 0.959894 | N | 4.294371 | 2.960285 | 0.990315 |
| C | 4.539676 | 2.821697 | -0.40432 | C | 4.540953 | 2.826696 | -0.36742 |
| C | 3.705385 | 1.821778 | -0.81702 | C | 3.727752 | 1.812766 | -0.78758 |
| O | 3.087419 | -1.4788  | 0.332252 | O | 3.079186 | -1.49367 | 0.334264 |
| C | 3.048851 | -2.70228 | -0.05061 | C | 3.03532  | -2.70989 | -0.07071 |
| O | 2.044006 | -3.35479 | -0.36771 | O | 2.028705 | -3.34911 | -0.40872 |
| O | 1.712802 | -0.01534 | 2.195308 | O | 1.700985 | -0.01955 | 2.196275 |
| O | 0.250593 | -1.51292 | 0.415398 | O | 0.254179 | -1.50628 | 0.402621 |
| O | -2.16222 | -0.16291 | 1.6704   | O | -2.16411 | -0.16915 | 1.66391  |
| C | -1.88953 | 0.236552 | 2.861862 | C | -1.89933 | 0.215645 | 2.86167  |
| C | -3.12697 | 0.341196 | 3.759242 | C | -3.14397 | 0.323709 | 3.748881 |
| O | -2.6655  | -1.48148 | -0.71498 | O | -2.64351 | -1.48636 | -0.72941 |
| C | -3.87813 | -1.85186 | -0.46436 | C | -3.85229 | -1.86518 | -0.46631 |
| O | -4.895   | -1.22736 | -0.76436 | O | -4.87542 | -1.25716 | -0.77605 |
| O | -0.78383 | 0.513085 | 3.33303  | O | -0.79542 | 0.476697 | 3.34577  |
| C | 4.420663 | -3.37805 | -0.09193 | C | 4.402434 | -3.39504 | -0.11098 |
| C | -3.98031 | -3.19626 | 0.254385 | C | -3.93657 | -3.19544 | 0.279479 |
| H | 0.172878 | -0.44071 | -4.52993 | H | 0.201587 | -0.38021 | -4.53346 |
| H | 1.512757 | -1.51522 | -4.0678  | H | 1.532634 | -1.46813 | -4.07809 |
| H | 1.80749  | 0.216488 | -4.20954 | H | 1.837516 | 0.263898 | -4.19408 |
| H | 4.857781 | -3.38136 | 0.910613 | H | 4.831036 | -3.41684 | 0.894967 |
| H | 4.33439  | -4.40176 | -0.4573  | H | 4.311915 | -4.41232 | -0.49289 |
| H | 5.096345 | -2.80894 | -0.73646 | H | 5.087594 | -2.82103 | -0.74101 |
| H | -3.53586 | -0.65913 | 3.930101 | H | -3.56631 | -0.67357 | 3.904127 |
| H | -3.90619 | 0.921886 | 3.259369 | H | -3.91165 | 0.919445 | 3.248767 |
| H | -2.87271 | 0.794922 | 4.718116 | H | -2.89362 | 0.763337 | 4.715311 |
| H | 0.826405 | 0.168999 | 2.577373 | H | 0.81121  | 0.151162 | 2.577362 |
| H | -3.42975 | -3.96188 | -0.29881 | H | -3.38177 | -3.96647 | -0.26184 |
| H | -5.022   | -3.49768 | 0.374799 | H | -4.9744  | -3.50468 | 0.412486 |
| H | -3.50457 | -3.10559 | 1.234777 | H | -3.45542 | -3.07982 | 1.254501 |
| H | -4.29386 | 0.775494 | -1.29529 | H | -4.29553 | 0.762979 | -1.31838 |
| H | -4.74051 | 3.477973 | -1.90485 | H | -4.75346 | 3.465772 | -1.9172  |
| H | -2.51023 | 4.60347  | -1.35132 | H | -2.53422 | 4.601163 | -1.34006 |
| H | -0.78031 | 2.886663 | -0.49339 | H | -0.79992 | 2.887339 | -0.47747 |
| H | 3.009117 | 1.842863 | 2.310974 | H | 2.959083 | 1.861262 | 2.323319 |
| H | 4.790029 | 3.58103  | 1.583439 | H | 4.73667  | 3.611349 | 1.616823 |
| H | 5.248981 | 3.438056 | -0.93193 | H | 5.25473  | 3.44565  | -0.88585 |
| H | 3.547759 | 1.39287  | -1.79205 | H | 3.595141 | 1.37322  | -1.76154 |
| H | 0.645592 | -2.34675 | 0.076477 | H | 0.636474 | -2.33887 | 0.045871 |

**Table S30.** B3LYP/6-311G\*-optimized coordinate for model  $^1\text{Fe}^1_0$ . The broken-symmetry structure is on the left, ferromagnetic on the right.

|    |          |          |          |    |          |          |          |
|----|----------|----------|----------|----|----------|----------|----------|
| Fe | -1.60726 | 0.126909 | 0.632037 | Fe | -1.60453 | 0.125915 | 0.628001 |
| Mn | 1.184393 | 0.145611 | -0.15246 | Mn | 1.182832 | 0.143353 | -0.1589  |

|   |          |          |          |   |          |          |          |
|---|----------|----------|----------|---|----------|----------|----------|
| C | -3.67648 | -2.06248 | 1.171069 | C | -3.68085 | -2.05189 | 1.1791   |
| N | -3.22542 | -1.31397 | 0.187773 | N | -3.23109 | -1.30503 | 0.194043 |
| C | -3.9595  | -1.62716 | -0.93146 | C | -3.96786 | -1.61833 | -0.92333 |
| C | -4.87528 | -2.59203 | -0.61803 | C | -4.88436 | -2.5815  | -0.60685 |
| N | -4.68141 | -2.85996 | 0.728584 | N | -4.68794 | -2.84829 | 0.739628 |
| O | -1.71694 | 0.320168 | -1.63762 | O | -1.71249 | 0.309088 | -1.64584 |
| C | -0.71115 | 0.519661 | -2.33952 | C | -0.70672 | 0.498644 | -2.35046 |
| C | -0.90613 | 0.873233 | -3.80728 | C | -0.90143 | 0.832393 | -3.82293 |
| O | 2.192618 | -0.10655 | 1.470464 | O | 2.183447 | -0.09578 | 1.470292 |
| C | 1.975344 | -0.64574 | 2.631274 | C | 1.972431 | -0.63342 | 2.632686 |
| O | 0.93126  | -1.09322 | 3.087708 | O | 0.931699 | -1.08512 | 3.092705 |
| O | -2.83889 | 1.726176 | 0.517726 | O | -2.83812 | 1.721139 | 0.517577 |
| C | -2.6451  | 2.880984 | -0.00641 | C | -2.64611 | 2.87484  | -0.00977 |
| C | -3.9128  | 3.731207 | -0.11888 | C | -3.91346 | 3.725408 | -0.11843 |
| O | -1.74582 | -0.39218 | 2.398979 | O | -1.74034 | -0.38924 | 2.397675 |
| O | 0.019764 | 1.400607 | 0.596194 | O | 0.015066 | 1.396224 | 0.573755 |
| O | -0.06548 | -1.00395 | 0.172236 | O | -0.06387 | -1.03649 | 0.152166 |
| N | 2.338092 | -1.38658 | -0.96705 | N | 2.34791  | -1.38544 | -0.9574  |
| C | 1.886953 | -2.61601 | -1.084   | C | 1.903359 | -2.61772 | -1.07156 |
| N | 2.846571 | -3.40537 | -1.62229 | N | 2.872035 | -3.40485 | -1.59642 |
| C | 3.967591 | -2.61878 | -1.84953 | C | 3.991393 | -2.61411 | -1.81792 |
| C | 3.633759 | -1.36047 | -1.43595 | C | 3.647774 | -1.35524 | -1.41436 |
| O | 2.61572  | 1.388592 | -0.6929  | O | 2.612352 | -1.38853 | 0.69978  |
| C | 3.688585 | 1.849553 | -0.12781 | C | 3.67537  | 1.863178 | -0.12699 |
| C | 3.450833 | 2.93248  | 0.920043 | C | 3.417838 | 2.949543 | 0.912525 |
| O | 0.509547 | 0.505459 | -1.96127 | O | 0.513868 | 0.489276 | -1.97132 |
| O | 4.830474 | 1.495677 | -0.41938 | O | 4.823014 | 1.518254 | -0.40607 |
| O | -1.56977 | 3.347595 | -0.40901 | O | -1.57199 | 3.339795 | -0.41776 |
| C | 3.243382 | -0.65183 | 3.491392 | C | 3.242614 | -0.63084 | 3.489516 |
| H | -0.02348 | 0.621846 | -4.39551 | H | -0.01447 | 0.58376  | -4.40576 |
| H | -1.06784 | 1.953174 | -3.87391 | H | -1.07627 | 1.909303 | -3.90408 |
| H | -1.7912  | 0.374382 | -4.20612 | H | -1.77942 | 0.317989 | -4.21786 |
| H | -4.37    | 3.845637 | 0.867844 | H | -4.36571 | 3.842709 | 0.870199 |
| H | -3.68659 | 4.712128 | -0.53816 | H | -3.68843 | 4.705011 | -0.5413  |
| H | -4.64195 | 3.218505 | -0.75313 | H | -4.64595 | 3.21153  | -0.74779 |
| H | 3.393837 | 0.349242 | 3.907246 | H | 3.391668 | 0.373011 | 3.899108 |
| H | 4.12316  | -0.88972 | 2.891244 | H | 4.121414 | -0.86963 | 2.888266 |
| H | 3.133682 | -1.35858 | 4.315109 | H | 3.137229 | -1.3333  | 4.317444 |
| H | -0.88527 | -0.68797 | 2.744348 | H | -0.8807  | -0.68249 | 2.747502 |
| H | 2.951482 | 3.788695 | 0.456838 | H | 2.90839  | 3.795664 | 0.441895 |
| H | 4.391414 | 3.254888 | 1.369854 | H | 4.351938 | 3.287692 | 1.364238 |
| H | 2.774999 | 2.546294 | 1.685338 | H | 2.744443 | 2.558918 | 1.677725 |
| H | 4.207951 | -0.44346 | -1.40208 | H | 4.217008 | -0.43522 | -1.38109 |
| H | 4.874301 | -3.02221 | -2.26949 | H | 4.903848 | -3.01521 | -2.22752 |
| H | 2.75828  | -4.38932 | -1.81187 | H | 2.790127 | -4.39021 | -1.78137 |
| H | 0.899864 | -2.91949 | -0.77333 | H | 0.914523 | -2.92134 | -0.76642 |
| H | -3.28244 | -2.00233 | 2.175274 | H | -3.28361 | -1.99198 | 2.182062 |
| H | -5.19947 | -3.51751 | 1.286791 | H | -5.20502 | -3.50522 | 1.299435 |
| H | -5.62621 | -3.09981 | -1.20142 | H | -5.63703 | -3.08906 | -1.18819 |
| H | -3.76053 | -1.12748 | -1.86491 | H | -3.76939 | -1.12061 | -1.85793 |

|   |          |          |          |   |          |          |          |
|---|----------|----------|----------|---|----------|----------|----------|
| H | -0.19998 | 2.231543 | 0.124684 | H | -0.21498 | 2.225089 | 0.102437 |
|---|----------|----------|----------|---|----------|----------|----------|

**Table S31.** B3LYP/6-311G\*-optimized coordinate for model  $^1\text{Mn}^0$ . The broken-symmetry structure is on the left, ferromagnetic on the right.

|    |          |          |          |    |          |          |          |
|----|----------|----------|----------|----|----------|----------|----------|
| Mn | 1.533988 | -0.25462 | 0.061255 | Mn | 1.526988 | -0.25356 | 0.047414 |
| Fe | -1.21192 | -0.42135 | 0.175933 | Fe | -1.20961 | -0.42324 | 0.16414  |
| C  | 2.29461  | 2.685143 | -0.49052 | C  | 2.304937 | 2.682329 | -0.47865 |
| N  | 2.799104 | 1.478587 | -0.45469 | N  | 2.800467 | 1.471854 | -0.44687 |
| C  | 4.134301 | 1.573112 | -0.7521  | C  | 4.138576 | 1.558346 | -0.73365 |
| C  | 4.451547 | 2.886217 | -0.97383 | C  | 4.467005 | 2.870468 | -0.94431 |
| N  | 3.264404 | 3.589082 | -0.80398 | N  | 3.283745 | 3.580926 | -0.77878 |
| O  | 1.235034 | -0.26745 | -1.99448 | O  | 1.228688 | -0.25619 | -2.00388 |
| C  | 0.096075 | -0.29753 | -2.53795 | C  | 0.089801 | -0.28241 | -2.54664 |
| C  | 0.102757 | -0.36356 | -4.06887 | C  | 0.090552 | -0.32967 | -4.07795 |
| O  | -1.70836 | -0.37263 | 2.158195 | O  | -1.68208 | -0.39337 | 2.15459  |
| C  | -1.21895 | 0.159189 | 3.2125   | C  | -1.18735 | 0.128199 | 3.211491 |
| O  | -1.29956 | 1.354755 | 3.543051 | O  | -1.24154 | 1.325657 | 3.540986 |
| O  | 3.2318   | -1.2504  | -0.33141 | O  | 3.219137 | -1.25599 | -0.33915 |
| C  | 3.907303 | -2.17355 | 0.267281 | C  | 3.879629 | -2.19485 | 0.25226  |
| C  | 3.139211 | -3.00052 | 1.298048 | C  | 3.097886 | -3.0209  | 1.272964 |
| O  | 2.061987 | -0.05598 | 1.823901 | O  | 2.03772  | -0.07069 | 1.815763 |
| O  | 0.333476 | -1.53638 | 0.247944 | O  | 0.329821 | -1.55379 | 0.223498 |
| O  | 0.184416 | 0.9126   | 0.266085 | O  | 0.186085 | 0.925808 | 0.251468 |
| N  | -2.72536 | 1.298262 | -0.00786 | N  | -2.70417 | 1.307836 | 0.011186 |
| C  | -2.74283 | 2.244997 | 0.902994 | C  | -2.69409 | 2.253783 | 0.922891 |
| N  | -3.66559 | 3.191639 | 0.574756 | N  | -3.61553 | 3.208286 | 0.614899 |
| C  | -4.27145 | 2.798999 | -0.61364 | C  | -4.24978 | 2.821865 | -0.56075 |
| C  | -3.66861 | 1.61887  | -0.95499 | C  | -3.66451 | 1.636954 | -0.91571 |
| O  | -2.70795 | -1.74972 | -0.21928 | O  | -2.7292  | -1.72393 | -0.22553 |
| C  | -3.63739 | -2.07897 | -1.02879 | C  | -3.6636  | -2.04425 | -1.03301 |
| C  | -3.90742 | -3.60016 | -1.04868 | C  | -3.94968 | -3.56225 | -1.05038 |
| O  | -1.02539 | -0.30909 | -1.98208 | O  | -1.03073 | -0.30419 | -1.9876  |
| O  | -4.32089 | -1.3516  | -1.75923 | O  | -4.34072 | -1.31049 | -1.76307 |
| O  | 5.104439 | -2.39582 | 0.054956 | O  | 5.074295 | -2.4309  | 0.040547 |
| C  | -0.4563  | -0.81397 | 4.118953 | C  | -0.45019 | -0.86049 | 4.122045 |
| H  | -0.82187 | 0.052811 | -4.4728  | H  | -0.81568 | 0.133138 | -4.47344 |
| H  | 0.16561  | -1.41354 | -4.37351 | H  | 0.101487 | -1.37759 | -4.3958  |
| H  | 0.972836 | 0.156818 | -4.47502 | H  | 0.9818   | 0.155729 | -4.48101 |
| H  | 2.172011 | -3.31229 | 0.898576 | H  | 2.122845 | -3.30577 | 0.872662 |
| H  | 3.734237 | -3.8603  | 1.618379 | H  | 3.677056 | -3.89653 | 1.579258 |
| H  | 2.913156 | -2.35318 | 2.149067 | H  | 2.887618 | -2.38157 | 2.134053 |
| H  | 0.46391  | -1.09226 | 3.597134 | H  | 0.477885 | -1.13706 | 3.613416 |
| H  | -1.0359  | -1.72923 | 4.268322 | H  | -1.03772 | -1.77374 | 4.25041  |
| H  | -0.21152 | -0.35494 | 5.080464 | H  | -0.21994 | -0.41285 | 5.092535 |
| H  | 1.396742 | 0.529558 | 2.206593 | H  | 1.374819 | 0.519655 | 2.195447 |
| H  | -3.01169 | -4.12038 | -1.40198 | H  | -3.06071 | -4.09203 | -1.40642 |
| H  | -4.75283 | -3.84256 | -1.69794 | H  | -4.79992 | -3.79631 | -1.69636 |



|   |          |          |          |   |          |          |          |
|---|----------|----------|----------|---|----------|----------|----------|
| H | -4.1021  | -3.9583  | -0.03307 | H | -4.14431 | -3.91728 | -0.0337  |
| H | -3.87325 | 0.923448 | -1.7552  | H | -3.89139 | 0.943511 | -1.71195 |
| H | -5.05596 | 3.378647 | -1.07545 | H | -5.03823 | 3.409059 | -1.00599 |
| H | -3.896   | 3.99898  | 1.128447 | H | -3.82785 | 4.016502 | 1.174494 |
| H | -2.15666 | 2.233034 | 1.817885 | H | -2.08951 | 2.234682 | 1.825355 |
| H | 1.252495 | 2.88658  | -0.28684 | H | 1.26273  | 2.889484 | -0.28133 |
| H | 3.140319 | 4.583404 | -0.88908 | H | 3.167637 | 4.576694 | -0.85793 |
| H | 5.376106 | 3.379874 | -1.23003 | H | 5.397063 | 3.358922 | -1.19034 |
| H | 4.733453 | 0.675245 | -0.78078 | H | 4.73092  | 0.656041 | -0.76389 |

**Table S32.** B3LYP/6-311G\*-optimized coordinate for model  $^1\text{Fe}^0$ . The broken-symmetry structure is on the left, ferromagnetic on the right.

|    |          |           |          |    |          |          |          |
|----|----------|-----------|----------|----|----------|----------|----------|
| Fe | -1.47273 | -0.19442  | -0.74212 | Fe | -1.46986 | -0.20408 | -0.73588 |
| Mn | 1.198152 | -0.30413  | 0.03636  | Mn | 1.186426 | -0.30887 | 0.054881 |
| C  | 3.760955 | 0.91819   | 1.70645  | C  | 3.762049 | 0.920476 | 1.690023 |
| N  | 2.48671  | 1.071194  | 1.219664 | N  | 2.480882 | 1.071956 | 1.220664 |
| C  | 2.056603 | 2.24814   | 1.593545 | C  | 2.057205 | 2.251382 | 1.594319 |
| N  | 3.013841 | 2.891369  | 2.319028 | N  | 3.025203 | 2.89755  | 2.302491 |
| C  | 4.114547 | 2.045673  | 2.397429 | C  | 4.126297 | 2.051399 | 2.369608 |
| O  | 0.619419 | -0.95401  | 1.816938 | O  | 0.612705 | -0.95934 | 1.835611 |
| C  | -0.59569 | -1.16448  | 2.140625 | C  | -0.60242 | -1.17323 | 2.157529 |
| C  | -0.76494 | -1.73337  | 3.554638 | C  | -0.77344 | -1.73612 | 3.573835 |
| O  | -0.02594 | 0.954414  | 0.04425  | O  | -0.03464 | 0.954711 | 0.079754 |
| N  | -2.89494 | 1.421539  | 0.032091 | N  | -2.88425 | 1.413334 | 0.021245 |
| C  | -2.4629  | 2.653723  | -0.04859 | C  | -2.44589 | 2.644649 | -0.0378  |
| N  | -3.48443 | 3.531412  | 0.157907 | N  | -3.46765 | 3.523601 | 0.160959 |
| C  | -4.63749 | 2.782176  | 0.366744 | C  | -4.62687 | 2.776731 | 0.342069 |
| C  | -4.24514 | 1.472496  | 0.284021 | C  | -4.23835 | 1.46656  | 0.2509   |
| O  | -1.61185 | -0.9918   | 1.453716 | O  | -1.61748 | -1.00865 | 1.466649 |
| O  | -3.13147 | -1.35755  | -0.90082 | O  | -3.13388 | -1.34791 | -0.91391 |
| C  | -3.95875 | -2.05117  | -0.2168  | C  | -3.9607  | -2.05239 | -0.23924 |
| O  | -5.05972 | -1.67569  | 0.213163 | O  | -5.07238 | -1.68944 | 0.172651 |
| O  | -1.52456 | 0.597912  | -2.41251 | O  | -1.49556 | 0.586969 | -2.40993 |
| O  | 0.118513 | -1.35241  | -0.81997 | O  | 0.118454 | -1.38221 | -0.79594 |
| O  | 2.235725 | 0.358533  | -1.51728 | O  | 2.208619 | 0.350335 | -1.51418 |
| C  | 2.090074 | 1.196947  | -2.47509 | C  | 2.076101 | 1.218875 | -2.44587 |
| C  | 3.395898 | 1.379482  | -3.27884 | C  | 3.36656  | 1.366702 | -3.28079 |
| O  | 2.82666  | -1.51345  | 0.34793  | O  | 2.817312 | -1.51228 | 0.354971 |
| C  | 3.516469 | -2.3545   | -0.3359  | C  | 3.513184 | -2.34397 | -0.33438 |
| O  | 4.668059 | -2.70773  | -0.0465  | O  | 4.670137 | -2.68422 | -0.05061 |
| O  | 1.092901 | 1.823883  | -2.83422 | O  | 1.097499 | 1.897911 | -2.76134 |
| C  | -3.50135 | -3.49195  | 0.059939 | C  | -3.48685 | -3.48501 | 0.048528 |
| C  | 2.845407 | -2.9181   | -1.59311 | C  | 2.842379 | -2.91264 | -1.58892 |
| H  | -0.55336 | -2.80745  | 3.531886 | H  | -0.57707 | -2.81319 | 3.552894 |
| H  | -1.78885 | -1.58575  | 3.901739 | H  | -1.79431 | -1.57477 | 3.924141 |
| H  | -1.05357 | 2.2728634 | 0.244495 | H  | -0.05392 | -1.28342 | 4.260303 |
| H  | -2.59706 | -3.44728  | 0.671228 | H  | -2.58939 | -3.42477 | 0.668242 |

|   |          |          |          |   |          |          |          |
|---|----------|----------|----------|---|----------|----------|----------|
| H | -4.27594 | -4.06477 | 0.577284 | H | -4.25898 | -4.06591 | 0.560455 |
| H | -3.23015 | -3.98757 | -0.87719 | H | -3.19963 | -3.98086 | -0.88369 |
| H | 3.533491 | 0.51374  | -3.93535 | H | 3.444495 | 0.517175 | -3.96763 |
| H | 4.260508 | 1.420962 | -2.61223 | H | 4.250263 | 1.346783 | -2.63876 |
| H | 3.341647 | 2.280246 | -3.89503 | H | 3.337723 | 2.288154 | -3.86746 |
| H | -0.68214 | 1.029725 | -2.62637 | H | -0.6649  | 1.050737 | -2.60138 |
| H | 1.774863 | -3.05878 | -1.43873 | H | 1.775837 | -3.07243 | -1.42581 |
| H | 3.33888  | -3.84357 | -1.90388 | H | 3.349516 | -3.82761 | -1.90868 |
| H | 2.939221 | -2.17645 | -2.39225 | H | 2.915418 | -2.16446 | -2.38397 |
| H | 4.286907 | -0.00536 | 1.513724 | H | 4.284725 | -0.00434 | 1.494203 |
| H | 5.01302  | 2.325843 | 2.925097 | H | 5.032573 | 2.333686 | 2.882561 |
| H | 2.936656 | 3.810744 | 2.719293 | H | 2.955109 | 3.819955 | 2.697044 |
| H | 1.072282 | 2.617339 | 1.347717 | H | 1.070362 | 2.620893 | 1.359905 |
| H | -1.44167 | 2.912419 | -0.28351 | H | -1.41902 | 2.900314 | -0.25082 |
| H | -3.42464 | 4.533816 | 0.101863 | H | -3.40287 | 4.526317 | 0.117949 |
| H | -5.594   | 3.247736 | 0.548464 | H | -5.58441 | 3.243779 | 0.514158 |
| H | -4.81237 | 0.550864 | 0.346652 | H | -4.81053 | 0.547093 | 0.296059 |

**Table S33.** B3LYP/6-311G\*-optimized coordinate for model  $^1\text{Mn}^1_1$ . The broken-symmetry structure is on the left, ferromagnetic on the right.

|    |          |          |          |    |          |          |          |
|----|----------|----------|----------|----|----------|----------|----------|
| C  | -2.93358 | -2.57419 | 0.150231 | C  | -2.92486 | -2.57823 | 0.154305 |
| N  | -3.13515 | -1.27269 | 0.170972 | N  | -3.1291  | -1.27703 | 0.173277 |
| C  | -4.49461 | -1.06273 | 0.137723 | C  | -4.48918 | -1.06994 | 0.14417  |
| C  | -5.12594 | -2.27147 | 0.092927 | C  | -5.11805 | -2.28007 | 0.10357  |
| N  | -4.1201  | -3.21989 | 0.100976 | N  | -4.11023 | -3.22635 | 0.110064 |
| Mn | -1.65377 | 0.160631 | 0.372743 | Mn | -1.65353 | 0.162006 | 0.368296 |
| O  | -1.62265 | 0.139952 | -1.64489 | O  | -1.62435 | 0.141407 | -1.64695 |
| C  | -0.61279 | 0.175757 | -2.40929 | C  | -0.61584 | 0.174323 | -2.41404 |
| C  | -0.88801 | 0.284351 | -3.89364 | C  | -0.89529 | 0.274076 | -3.89824 |
| Fe | 1.367268 | 0.249525 | -0.14159 | Fe | 1.366242 | 0.254061 | -0.14581 |
| O  | 2.040741 | 0.050766 | 1.716306 | O  | 2.039779 | 0.06321  | 1.716753 |
| C  | 1.631156 | -0.49878 | 2.799011 | C  | 1.63477  | -0.49608 | 2.795875 |
| O  | 0.598192 | -1.19203 | 2.90139  | O  | 0.604845 | -1.19488 | 2.895391 |
| O  | -3.0082  | 1.506518 | 0.197441 | O  | -3.00831 | 1.505546 | 0.197367 |
| C  | -2.8688  | 2.774718 | -0.07784 | C  | -2.8759  | 2.776856 | -0.06939 |
| C  | -4.18808 | 3.51491  | -0.18385 | C  | -4.20058 | 3.50787  | -0.17458 |
| O  | -1.86862 | 0.075466 | 2.136364 | O  | -1.85973 | 0.083103 | 2.133001 |
| O  | -0.22706 | 1.351411 | 0.39445  | O  | -0.2259  | 1.358681 | 0.38431  |
| O  | -0.27995 | -1.13691 | 0.362966 | O  | -0.27516 | -1.13551 | 0.3579   |
| N  | 2.548399 | -1.46091 | -0.70144 | N  | 2.542844 | -1.45985 | -0.69795 |
| C  | 2.088957 | -2.6597  | -1.00152 | C  | 2.08282  | -2.65844 | -0.9981  |
| N  | 3.113767 | -3.48527 | -1.31141 | N  | 3.107443 | -3.48509 | -1.30545 |
| C  | 4.290645 | -2.76477 | -1.20105 | C  | 4.284835 | -2.76569 | -1.1932  |
| C  | 3.924108 | -1.50649 | -0.82089 | C  | 3.918816 | -1.5068  | -0.81472 |
| O  | 2.582489 | 1.602951 | -0.58098 | O  | 2.586258 | 1.600109 | -0.58915 |
| C  | 3.762445 | 2.116706 | -0.29822 | C  | 3.765    | 2.11406  | -0.30051 |
| C  | 3.728631 | 3.617498 | -0.08172 | C  | 3.730042 | 3.615035 | -0.0857  |

|   |          |          |          |   |          |          |          |
|---|----------|----------|----------|---|----------|----------|----------|
| O | 0.589813 | 0.150051 | -2.04144 | O | 0.587168 | 0.153405 | -2.04825 |
| O | 4.791097 | 1.468205 | -0.23134 | O | 4.793098 | 1.465566 | -0.22763 |
| O | -1.79913 | 3.358239 | -0.24119 | O | -1.8103  | 3.368627 | -0.22537 |
| C | 2.491071 | -0.24142 | 4.019659 | C | 2.496205 | -0.24491 | 4.016844 |
| H | -0.11209 | -0.22749 | -4.46278 | H | -0.11723 | -0.23508 | -4.46684 |
| H | -0.86337 | 1.342037 | -4.17222 | H | -0.87889 | 1.330572 | -4.18192 |
| H | -1.87375 | -0.11033 | -4.13719 | H | -1.87887 | -0.12848 | -4.13775 |
| H | -4.74258 | 3.418773 | 0.75258  | H | -4.75667 | 3.402373 | 0.759909 |
| H | -4.01139 | 4.566854 | -0.40125 | H | -4.03098 | 4.562303 | -0.38541 |
| H | -4.80031 | 3.07346  | -0.9743  | H | -4.80755 | 3.066514 | -0.96911 |
| H | 2.343676 | 0.792331 | 4.345558 | H | 2.357068 | 0.789961 | 4.342642 |
| H | 3.547068 | -0.35195 | 3.768383 | H | 3.551353 | -0.36327 | 3.76517  |
| H | 2.217355 | -0.91203 | 4.832946 | H | 2.218177 | -0.91395 | 4.829946 |
| H | -1.06964 | -0.18044 | 2.628936 | H | -1.06185 | -0.1825  | 2.622258 |
| H | 3.296034 | 4.111429 | -0.95508 | H | 3.299849 | 4.107999 | -0.96078 |
| H | 4.732134 | 3.99859  | 0.102682 | H | 4.732822 | 3.99665  | 0.101503 |
| H | 3.082813 | 3.849421 | 0.76922  | H | 3.081636 | 3.847362 | 0.763167 |
| H | 4.516855 | -0.62239 | -0.62931 | H | 4.512192 | -0.62319 | -0.62277 |
| H | 5.252983 | -3.2052  | -1.40126 | H | 5.247147 | -3.20715 | -1.39122 |
| H | 3.032139 | -4.45381 | -1.57424 | H | 3.02539  | -4.45374 | -1.56775 |
| H | 1.049175 | -2.94116 | -0.99495 | H | 1.042742 | -2.93862 | -0.99318 |
| H | -1.96717 | -3.04767 | 0.178396 | H | -1.95744 | -3.04967 | 0.180021 |
| H | -4.24452 | -4.21902 | 0.084662 | H | -4.23263 | -4.22577 | 0.095961 |
| H | -6.16855 | -2.53897 | 0.059018 | H | -6.16021 | -2.54978 | 0.073448 |
| H | -4.89263 | -0.06318 | 0.15727  | H | -4.88926 | -0.0712  | 0.163234 |
| H | -0.53561 | 2.255566 | 0.142118 | H | -0.53284 | 2.265736 | 0.144726 |
| H | -0.04683 | -1.39038 | 1.288178 | H | -0.04052 | -1.39113 | 1.282109 |

**Table S34.** B3LYP/6-311G\*-optimized coordinate for model  $^1\text{Fe}^1_1$ . The broken-symmetry structure is on the left, ferromagnetic on the right.

|    |          |          |          |    |          |          |          |
|----|----------|----------|----------|----|----------|----------|----------|
| Fe | 3.914386 | -0.26761 | 2.298918 | Fe | 3.90748  | -0.27797 | 2.301792 |
| Mn | 1.064541 | -1.08869 | 1.472782 | Mn | 1.064077 | -1.10049 | 1.463303 |
| C  | -1.61391 | -0.47467 | -0.0214  | C  | -1.6086  | -0.46534 | -0.02566 |
| N  | -0.26355 | -0.23336 | 0.142294 | N  | -0.25676 | -0.23084 | 0.136372 |
| C  | 0.093288 | 0.67554  | -0.74774 | C  | 0.103012 | 0.678968 | -0.75168 |
| N  | -0.97747 | 1.030067 | -1.48702 | N  | -0.96742 | 1.04077  | -1.48781 |
| C  | -2.07177 | 0.309982 | -1.03842 | C  | -2.06439 | 0.324624 | -1.03944 |
| O  | 1.977823 | -1.82176 | -0.06888 | O  | 1.97465  | -1.83334 | -0.07725 |
| C  | 3.238636 | -1.81614 | -0.31132 | C  | 3.236236 | -1.82464 | -0.3217  |
| C  | 3.650682 | -2.6168  | -1.52794 | C  | 3.64588  | -2.62169 | -1.54172 |
| O  | 2.12225  | 0.466048 | 1.330157 | O  | 2.128297 | 0.457411 | 1.323498 |
| N  | 5.396539 | 1.053722 | 1.447417 | N  | 5.383946 | 1.04912  | 1.455517 |
| C  | 5.715265 | 2.186202 | 2.046312 | C  | 5.707036 | 2.174945 | 2.064508 |
| N  | 6.736106 | 2.785296 | 1.393303 | N  | 6.725725 | 2.779164 | 1.412902 |
| C  | 7.090132 | 1.984513 | 0.321437 | C  | 7.073726 | 1.988754 | 0.33142  |
| C  | 6.247449 | 0.912416 | 0.372571 | C  | 6.229793 | 0.917317 | 0.375485 |
| O  | 4.110813 | -1.24691 | 0.366937 | O  | 4.107935 | -1.25671 | 0.356971 |

|   |          |          |          |   |          |          |          |
|---|----------|----------|----------|---|----------|----------|----------|
| O | 5.201067 | -1.5876  | 2.970937 | O | 5.203729 | -1.58914 | 2.966286 |
| C | 5.134579 | -2.87781 | 3.044161 | C | 5.147201 | -2.88011 | 3.041841 |
| O | 4.121887 | -3.55944 | 2.839555 | O | 4.1404   | -3.57031 | 2.839554 |
| O | 3.671447 | 0.938969 | 3.661601 | O | 3.661854 | 0.919723 | 3.675254 |
| O | 2.396681 | -1.6072  | 2.629953 | O | 2.403142 | -1.63064 | 2.614244 |
| O | -0.01878 | -0.40875 | 2.876236 | O | -0.01101 | -0.42134 | 2.873447 |
| C | 0.021005 | 0.702684 | 3.546843 | C | 0.018314 | 0.697796 | 3.532826 |
| C | -0.97167 | 0.743027 | 4.688664 | C | -0.96952 | 0.736217 | 4.679062 |
| O | 0.170575 | -2.72473 | 1.577854 | O | 0.160304 | -2.72814 | 1.567923 |
| C | -0.92981 | -3.17989 | 2.155155 | C | -0.93735 | -3.1747  | 2.159235 |
| O | -2.01449 | -2.62996 | 2.132272 | O | -2.02315 | -2.6283  | 2.125074 |
| O | 0.782598 | 1.649538 | 3.324829 | O | 0.766319 | 1.651816 | 3.297765 |
| C | 6.441058 | -3.5496  | 3.427766 | C | 6.460101 | -3.53973 | 3.425117 |
| C | -0.70746 | -4.51718 | 2.836679 | C | -0.70941 | -4.49526 | 2.869917 |
| H | 2.836679 | -2.68782 | -2.24808 | H | 2.831177 | -2.68923 | -2.26145 |
| H | 3.902235 | -3.62851 | -1.1966  | H | 3.896574 | -3.63497 | -1.21453 |
| H | 4.53791  | -2.18191 | -1.98835 | H | 4.533181 | -2.18623 | -2.00147 |
| H | 6.754614 | -3.20059 | 4.414952 | H | 6.774087 | -3.1833  | 4.409481 |
| H | 6.327432 | -4.6326  | 3.440468 | H | 6.354932 | -4.6235  | 3.443392 |
| H | 7.225875 | -3.2643  | 2.722964 | H | 7.240402 | -3.252   | 2.716275 |
| H | -0.55128 | 0.19337  | 5.535967 | H | -0.54514 | 0.187092 | 5.524671 |
| H | -1.90184 | 0.249722 | 4.406724 | H | -1.89982 | 0.240959 | 4.400654 |
| H | -1.15181 | 1.773053 | 4.993916 | H | -1.15099 | 1.765898 | 4.984558 |
| H | 2.810674 | 1.292152 | 3.916208 | H | 2.802374 | 1.283972 | 3.917827 |
| H | -0.23416 | -5.2186  | 2.146434 | H | -0.23307 | -5.20984 | 2.19546  |
| H | -1.65325 | -4.92131 | 3.195194 | H | -1.6533  | -4.89535 | 3.237787 |
| H | -0.02033 | -4.3839  | 3.67656  | H | -0.02274 | -4.33996 | 3.706437 |
| H | -2.1189  | -1.18389 | 0.617934 | H | -2.11587 | -1.17493 | 0.6115   |
| H | -3.0506  | 0.422491 | -1.47315 | H | -3.04335 | 0.442858 | -1.47232 |
| H | -0.9756  | 1.710895 | -2.22902 | H | -0.96363 | 1.72381  | -2.22778 |
| H | 1.08552  | 1.081388 | -0.84835 | H | 1.097122 | 1.079841 | -0.85313 |
| H | 5.2296   | 2.549136 | 2.937733 | H | 5.225803 | 2.529349 | 2.961768 |
| H | 7.170347 | 3.655327 | 1.655368 | H | 7.162511 | 3.645795 | 1.681889 |
| H | 7.887901 | 2.247473 | -0.35304 | H | 7.868746 | 2.257421 | -0.34405 |
| H | 6.181323 | 0.049711 | -0.26784 | H | 6.159481 | 0.060945 | -0.27292 |
| H | 2.744912 | -2.5348  | 2.674229 | H | 2.749137 | -2.55753 | 2.664099 |
| H | 1.733028 | 1.150091 | 1.918671 | H | 1.730996 | 1.147453 | 1.898597 |

**Table S35.** BP86/TZP-optimized coordinate for model (1). The broken-symmetry structure is on the left, ferromagnetic on the right.

|    |          |          |          |    |          |          |          |
|----|----------|----------|----------|----|----------|----------|----------|
| Mn | 1.288562 | 0.000008 | -0.00024 | Mn | 1.288911 | -0.00064 | -0.00057 |
| Mn | -1.45266 | 0.000084 | -0.00025 | Mn | -1.46488 | -0.00055 | 0.000339 |
| O  | -0.10054 | -0.12849 | -1.18775 | O  | -0.15606 | -0.13246 | -1.22262 |
| O  | -0.1006  | 0.128967 | 1.187238 | O  | -0.15603 | 0.131347 | 1.222943 |
| N  | 1.736444 | -2.13232 | -0.31317 | N  | 1.783921 | -2.20215 | -0.35802 |
| C  | 2.751524 | -2.65329 | 0.421188 | C  | 2.778539 | -2.71195 | 0.405791 |
| C  | 3.223037 | -3.95195 | 0.181279 | C  | 3.252597 | -4.01653 | 0.204609 |

|   |          |          |          |   |          |          |          |
|---|----------|----------|----------|---|----------|----------|----------|
| C | 2.631696 | -4.72094 | -0.8202  | C | 2.683306 | -4.80266 | -0.79586 |
| C | 1.578394 | -4.17894 | -1.56276 | C | 1.649323 | -4.27319 | -1.57309 |
| C | 1.164975 | -2.87924 | -1.27824 | C | 1.233252 | -2.96788 | -1.31901 |
| H | 0.366221 | -2.38798 | -1.83478 | H | 0.444313 | -2.4905  | -1.90189 |
| H | 1.091763 | -4.7459  | -2.35557 | H | 1.180791 | -4.85361 | -2.367   |
| H | 2.993339 | -5.72937 | -1.02212 | H | 3.046092 | -5.81587 | -0.96822 |
| H | 4.049748 | -4.35929 | 0.75884  | H | 4.0608   | -4.41985 | 0.810356 |
| C | 3.289989 | -1.76145 | 1.467999 | C | 3.296829 | -1.8023  | 1.450729 |
| C | 4.259964 | -2.16939 | 2.391169 | C | 4.274928 | -2.1945  | 2.372539 |
| H | 4.670755 | -3.17557 | 2.348708 | H | 4.701106 | -3.19378 | 2.328102 |
| N | 2.76151  | -0.50509 | 1.506235 | N | 2.75273  | -0.55106 | 1.492796 |
| C | 3.178049 | 0.336981 | 2.473477 | C | 3.162338 | 0.295415 | 2.460354 |
| H | 2.723232 | 1.324047 | 2.486084 | H | 2.694801 | 1.27579  | 2.473177 |
| C | 4.137413 | -0.00672 | 3.423015 | C | 4.131558 | -0.03419 | 3.404115 |
| H | 4.43296  | 0.718799 | 4.179899 | H | 4.425142 | 0.696062 | 4.157016 |
| C | 4.69621  | -1.28333 | 3.375571 | C | 4.705682 | -1.30356 | 3.353723 |
| H | 5.454095 | -1.58923 | 4.096813 | H | 5.47207  | -1.59976 | 4.070124 |
| N | 2.760981 | 0.505221 | -1.50709 | N | 2.753829 | 0.552876 | -1.49548 |
| C | 3.177383 | -0.33648 | -2.47471 | C | 3.165867 | -0.29293 | -2.46264 |
| C | 4.137429 | 0.007403 | -3.42365 | C | 4.134904 | 0.038059 | -3.40565 |
| C | 4.69666  | 1.283964 | -3.37533 | C | 4.707176 | 1.308021 | -3.35615 |
| C | 4.261117 | 2.169192 | -2.38987 | C | 4.276044 | 2.197823 | -2.37385 |
| C | 3.290081 | 1.761223 | -1.46781 | C | 3.296986 | 1.804676 | -1.45303 |
| H | 4.671703 | 3.175488 | -2.34748 | H | 4.702239 | 3.196939 | -2.32799 |
| H | 5.454993 | 1.589747 | -4.09614 | H | 5.473789 | 1.605358 | -4.07173 |
| H | 4.435149 | -0.71862 | -4.1792  | H | 4.429058 | -0.69234 | -4.15826 |
| H | 2.72234  | -1.32339 | -2.48723 | H | 2.699784 | -1.27417 | -2.47585 |
| C | 2.751646 | 2.652531 | -0.42045 | C | 2.779447 | 2.712421 | -0.40627 |
| C | 3.223511 | 3.950938 | -0.17992 | C | 3.255956 | 4.015717 | -0.20142 |
| H | 4.050932 | 4.357966 | -0.75683 | H | 4.0653   | 4.419157 | -0.80563 |
| C | 2.631198 | 4.720184 | 0.820671 | C | 2.687686 | 4.800307 | 0.801004 |
| H | 2.992471 | 5.728824 | 1.022563 | H | 3.053725 | 5.811875 | 0.976326 |
| C | 1.57763  | 4.178462 | 1.562792 | C | 1.652041 | 4.271042 | 1.57581  |
| H | 1.091123 | 4.745803 | 2.355375 | H | 1.184199 | 4.850408 | 2.370995 |
| C | 1.164413 | 2.878807 | 1.278395 | C | 1.23345  | 2.967463 | 1.318331 |
| H | 0.365768 | 2.387724 | 1.835222 | H | 0.443457 | 2.48967  | 1.899219 |
| N | 1.735888 | 2.132016 | 0.313182 | N | 1.78366  | 2.202584 | 0.356178 |
| N | -1.70736 | 1.971266 | -0.4248  | N | -1.72794 | 1.981479 | -0.42391 |
| C | -1.07556 | 2.596728 | -1.44335 | C | -1.09177 | 2.60149  | -1.44084 |
| C | -1.32551 | 3.927797 | -1.76281 | C | -1.33867 | 3.932976 | -1.76302 |
| C | -2.25866 | 4.639593 | -1.00378 | C | -2.26991 | 4.647793 | -1.00549 |
| C | -2.91321 | 3.994586 | 0.043909 | C | -2.92766 | 4.006453 | 0.042945 |
| C | -2.62662 | 2.651863 | 0.319928 | C | -2.64594 | 2.663807 | 0.319732 |
| H | -0.37302 | 1.98093  | -2.00179 | H | -0.39052 | 1.979661 | -1.99473 |
| H | -0.80055 | 4.39047  | -2.59774 | H | -0.81022 | 4.392526 | -2.59721 |
| H | -2.48059 | 5.682329 | -1.2315  | H | -2.49019 | 5.690775 | -1.2332  |
| H | -3.65441 | 4.528795 | 0.634315 | H | -3.66656 | 4.544145 | 0.632855 |
| C | -3.27954 | 1.862272 | 1.37206  | C | -3.30334 | 1.879805 | 1.376078 |
| N | -2.92011 | 0.546236 | 1.402897 | N | -2.95326 | 0.562858 | 1.414597 |
| C | -3.48124 | -0.24955 | 2.335879 | C | -3.50514 | -0.22527 | 2.35712  |

|   |          |          |          |   |          |          |          |
|---|----------|----------|----------|---|----------|----------|----------|
| C | -4.41291 | 0.210898 | 3.264015 | C | -4.42725 | 0.245488 | 3.290062 |
| H | -4.83569 | -0.48265 | 3.990093 | H | -4.84602 | -0.43797 | 4.027456 |
| H | -5.50954 | 1.950707 | 3.947019 | H | -5.51222 | 1.993079 | 3.966195 |
| C | -4.78336 | 1.55577  | 3.236583 | C | -4.79326 | 1.590685 | 3.25247  |
| C | -4.20623 | 2.388833 | 2.278934 | C | -4.22173 | 2.416195 | 2.284449 |
| H | -4.47803 | 3.44162  | 2.240898 | H | -4.48935 | 3.469595 | 2.242697 |
| H | -3.17538 | -1.29262 | 2.338795 | H | -3.19849 | -1.26848 | 2.363873 |
| N | -2.91989 | -0.54648 | -1.40355 | N | -2.95415 | -0.56307 | -1.41246 |
| C | -3.48161 | 0.249508 | -2.33614 | C | -3.50587 | 0.22556  | -2.35478 |
| C | -4.41379 | -0.21068 | -3.2638  | C | -4.42716 | -0.24504 | -3.28887 |
| C | -4.78472 | -1.55556 | -3.23564 | C | -4.79099 | -1.59098 | -3.25465 |
| C | -4.20595 | -2.38938 | -2.27949 | C | -4.21807 | -2.4172  | -2.28807 |
| C | -3.27857 | -1.86272 | -1.37311 | C | -3.30327 | -1.88022 | -1.37604 |
| H | -3.17588 | 1.292628 | -2.33882 | H | -3.1993  | 1.268546 | -2.3619  |
| H | -4.8365  | 0.482996 | -3.98978 | H | -4.84396 | 0.438937 | -4.02699 |
| H | -5.51188 | -1.9502  | -3.94526 | H | -5.50613 | -1.99439 | -3.97161 |
| H | -4.47792 | -3.44212 | -2.24149 | H | -4.48137 | -3.47206 | -2.25043 |
| N | -1.7071  | -1.97106 | 0.424519 | N | -1.72898 | -1.98278 | 0.423808 |
| C | -1.07566 | -2.59618 | 1.443539 | C | -1.09112 | -2.60304 | 1.439527 |
| H | -0.80114 | -4.38946 | 2.598942 | H | -0.80943 | -4.39367 | 2.596571 |
| C | -2.25864 | -4.63928 | 1.004516 | C | -2.27278 | -4.64808 | 1.008161 |
| C | -1.32605 | -3.92697 | 1.763875 | C | -1.33873 | -3.93416 | 1.762833 |
| C | -2.91333 | -3.9945  | -0.04337 | C | -2.93181 | -4.00669 | -0.0397  |
| C | -2.62621 | -2.65193 | -0.32019 | C | -2.64818 | -2.66474 | -0.31896 |
| H | -0.37277 | -1.98041 | 2.001543 | H | -0.38907 | -1.98151 | 1.992839 |
| H | -2.48067 | -5.68187 | 1.232327 | H | -2.49453 | -5.69034 | 1.237849 |
| H | -3.65475 | -4.52885 | -0.63326 | H | -3.67283 | -4.54428 | -0.62696 |

**Table S36.** B3LYP/6-311G\*-optimized coordinate for model (1). The broken-symmetry structure is on the left, ferromagnetic on the right.

|    |          |          |          |    |          |          |          |
|----|----------|----------|----------|----|----------|----------|----------|
| Mn | 1.280626 | 0.000001 | -1E-06   | Mn | 1.271955 | 0.000002 | -1E-06   |
| Mn | -1.47554 | 0        | 0        | Mn | -1.48154 | -1E-06   | -1E-06   |
| O  | -0.16822 | 0.148983 | 1.173514 | O  | -0.17867 | 0.166479 | 1.189226 |
| O  | -0.16822 | -0.14898 | -1.17352 | O  | -0.17867 | -0.16648 | -1.18923 |
| N  | 1.774636 | 2.213667 | 0.272513 | N  | 1.776676 | 2.229539 | 0.263966 |
| C  | 2.812767 | 2.668606 | -0.45849 | C  | 2.824679 | 2.665241 | -0.46363 |
| C  | 3.352342 | 3.938376 | -0.23427 | C  | 3.379453 | 3.929853 | -0.24737 |
| C  | 2.797121 | 4.749282 | 0.749658 | C  | 2.826809 | 4.756748 | 0.724792 |
| C  | 1.713464 | 4.278415 | 1.487197 | C  | 1.731294 | 4.306665 | 1.457756 |
| C  | 1.239153 | 3.001061 | 1.216679 | C  | 1.243497 | 3.032285 | 1.195953 |
| H  | 0.416431 | 2.565458 | 1.773049 | H  | 0.411766 | 2.611351 | 1.750276 |
| H  | 1.256315 | 4.879932 | 2.263566 | H  | 1.275403 | 4.921679 | 2.22425  |
| H  | 3.209726 | 5.733849 | 0.938987 | H  | 3.2503   | 5.737787 | 0.908278 |
| H  | 4.199749 | 4.296694 | -0.80322 | H  | 4.235433 | 4.272646 | -0.81312 |
| C  | 3.307794 | 1.739967 | -1.50414 | C  | 3.310481 | 1.722162 | -1.50054 |
| C  | 4.263515 | 2.116157 | -2.44771 | C  | 4.271723 | 2.080508 | -2.44542 |
| H  | 4.699667 | 3.105528 | -2.42628 | H  | 4.721403 | 3.06383  | -2.42702 |

|   |          |          |          |   |          |          |          |
|---|----------|----------|----------|---|----------|----------|----------|
| N | 2.751752 | 0.500112 | -1.52578 | N | 2.737904 | 0.489007 | -1.51791 |
| C | 3.11969  | -0.34974 | -2.49847 | C | 3.091361 | -0.36793 | -2.49036 |
| H | 2.640748 | -1.31808 | -2.49503 | H | 2.596613 | -1.32795 | -2.48557 |
| C | 4.059924 | -0.03647 | -3.47048 | C | 4.035293 | -0.0707  | -3.46345 |
| H | 4.316118 | -0.76486 | -4.22982 | H | 4.278831 | -0.80413 | -4.22208 |
| C | 4.651029 | 1.220336 | -3.43806 | C | 4.646229 | 1.176645 | -3.43328 |
| H | 5.393437 | 1.506374 | -4.17429 | H | 5.3929   | 1.449814 | -4.1701  |
| N | 2.751751 | -0.50011 | 1.525782 | N | 2.737907 | -0.489   | 1.517914 |
| C | 3.119688 | 0.349742 | 2.498476 | C | 3.091365 | 0.367931 | 2.490357 |
| C | 4.059919 | 0.036472 | 3.470486 | C | 4.035299 | 0.070704 | 3.463449 |
| C | 4.651021 | -1.22034 | 3.438062 | C | 4.646235 | -1.17664 | 3.433275 |
| C | 4.263509 | -2.11616 | 2.44771  | C | 4.271728 | -2.08051 | 2.445419 |
| C | 3.307791 | -1.73997 | 1.50414  | C | 3.310485 | -1.72216 | 1.500537 |
| H | 4.699659 | -3.10553 | 2.42629  | H | 4.721409 | -3.06383 | 2.427019 |
| H | 5.393426 | -1.50638 | 4.174301 | H | 5.392906 | -1.44981 | 4.170092 |
| H | 4.316112 | 0.764855 | 4.229829 | H | 4.278837 | 0.804133 | 4.222081 |
| H | 2.640748 | 1.318079 | 2.495031 | H | 2.596616 | 1.327953 | 2.485575 |
| C | 2.812767 | -2.6686  | 0.458486 | C | 2.824683 | -2.66524 | 0.463624 |
| C | 3.352344 | -3.93837 | 0.234272 | C | 3.379458 | -3.92985 | 0.247363 |
| H | 4.199752 | -4.29669 | 0.803221 | H | 4.235439 | -4.27264 | 0.813121 |
| C | 2.797124 | -4.74928 | -0.74966 | C | 2.826815 | -4.75674 | -0.72479 |
| H | 3.209732 | -5.73384 | -0.93899 | H | 3.250308 | -5.73778 | -0.90828 |
| C | 1.713467 | -4.27841 | -1.4872  | C | 1.7313   | -4.30666 | -1.45776 |
| H | 1.256319 | -4.87993 | -2.26357 | H | 1.275409 | -4.92168 | -2.22425 |
| C | 1.239154 | -3.00106 | -1.21668 | C | 1.243501 | -3.03228 | -1.19595 |
| H | 0.416431 | -2.56546 | -1.77305 | H | 0.41177  | -2.61135 | -1.75028 |
| N | 1.774635 | -2.21367 | -0.27251 | N | 1.776679 | -2.22954 | -0.26397 |
| N | -1.73856 | -1.97831 | 0.436231 | N | -1.7406  | -1.97638 | 0.457057 |
| C | -1.10744 | -2.58769 | 1.455844 | C | -1.10762 | -2.57045 | 1.484272 |
| C | -1.34405 | -3.91523 | 1.781308 | C | -1.33722 | -3.89606 | 1.822502 |
| C | -2.2649  | -4.63513 | 1.02522  | C | -2.25211 | -4.62886 | 1.071555 |
| C | -2.92113 | -4.00279 | -0.02559 | C | -2.91031 | -4.01134 | 0.013    |
| C | -2.6472  | -2.66436 | -0.30493 | C | -2.64401 | -2.67428 | -0.27938 |
| H | -0.41766 | -1.96575 | 2.010253 | H | -0.42413 | -1.93635 | 2.033089 |
| H | -0.82267 | -4.36603 | 2.616658 | H | -0.81507 | -4.33549 | 2.6634   |
| H | -2.48002 | -5.6727  | 1.254553 | H | -2.46154 | -5.66533 | 1.31095  |
| H | -3.6515  | -4.5481  | -0.60816 | H | -3.63642 | -4.56694 | -0.56518 |
| C | -3.30942 | -1.88831 | -1.36931 | C | -3.30958 | -1.91219 | -1.35204 |
| N | -2.98141 | -0.57205 | -1.40673 | N | -2.99053 | -0.59442 | -1.40081 |
| C | -3.53872 | 0.204298 | -2.34741 | C | -3.55087 | 0.1709   | -2.34841 |
| C | -4.44594 | -0.2772  | -3.28322 | C | -4.4539  | -0.32429 | -3.28115 |
| H | -4.86888 | 0.394652 | -4.01986 | H | -4.88044 | 0.338364 | -4.02401 |
| H | -5.49017 | -2.03751 | -3.96224 | H | -5.4858  | -2.09706 | -3.9462  |
| C | -4.78753 | -1.62361 | -3.24818 | C | -4.78672 | -1.67262 | -3.23482 |
| C | -4.20944 | -2.43824 | -2.27966 | C | -4.20476 | -2.47566 | -2.2588  |
| H | -4.46143 | -3.48981 | -2.2452  | H | -4.4502  | -3.52848 | -2.21589 |
| H | -3.24858 | 1.245645 | -2.35301 | H | -3.26653 | 1.213895 | -2.36202 |
| N | -2.98141 | 0.572047 | 1.406734 | N | -2.99052 | 0.594412 | 1.400808 |
| C | -3.53872 | -0.2043  | 2.347412 | C | -3.55087 | -0.1709  | 2.348415 |
| C | -4.44594 | 0.277197 | 3.283218 | C | -4.45389 | 0.324285 | 3.281154 |

|   |          |          |          |   |          |          |          |
|---|----------|----------|----------|---|----------|----------|----------|
| C | -4.78754 | 1.623603 | 3.248176 | C | -4.78672 | 1.672615 | 3.234826 |
| C | -4.20945 | 2.438239 | 2.279657 | C | -4.20476 | 2.475651 | 2.258803 |
| C | -3.30942 | 1.888303 | 1.369306 | C | -3.30957 | 1.912187 | 1.352042 |
| H | -3.24858 | -1.24565 | 2.353014 | H | -3.26652 | -1.2139  | 2.362027 |
| H | -4.86888 | -0.39466 | 4.01986  | H | -4.88043 | -0.33837 | 4.024018 |
| H | -5.49017 | 2.037506 | 3.962242 | H | -5.48579 | 2.097052 | 3.946208 |
| H | -4.46144 | 3.489804 | 2.245194 | H | -4.4502  | 3.528473 | 2.215893 |
| N | -1.73857 | 1.978309 | -0.43623 | N | -1.7406  | 1.976375 | -0.45706 |
| C | -1.10745 | 2.587688 | -1.45584 | C | -1.10762 | 2.570446 | -1.48427 |
| H | -0.82268 | 4.366034 | -2.61666 | H | -0.81508 | 4.335487 | -2.6634  |
| C | -2.2649  | 4.635128 | -1.02522 | C | -2.25212 | 4.628855 | -1.07155 |
| C | -1.34405 | 3.915227 | -1.78131 | C | -1.33723 | 3.896055 | -1.8225  |
| C | -2.92113 | 4.002792 | 0.025585 | C | -2.91032 | 4.011333 | -0.013   |
| C | -2.6472  | 2.664358 | 0.304926 | C | -2.64401 | 2.67428  | 0.279385 |
| H | -0.41767 | 1.965752 | -2.01025 | H | -0.42413 | 1.936351 | -2.03309 |
| H | -2.48003 | 5.672694 | -1.25455 | H | -2.46155 | 5.665324 | -1.31095 |
| H | -3.6515  | 4.548098 | 0.608155 | H | -3.63642 | 4.56694  | 0.565186 |

**Table S37.** BP86/TZP-optimized coordinate for model (2).

|    |          |          |          |
|----|----------|----------|----------|
| Fe | -1.25728 | 0.068135 | -0.23999 |
| Fe | 1.32912  | 0.075146 | 0.224694 |
| O  | 0.311148 | 0.075934 | -1.24454 |
| O  | -0.23941 | 0.067953 | 1.229446 |
| N  | 1.609832 | -1.90013 | 0.393709 |
| C  | 2.073629 | -2.29134 | 1.612459 |
| C  | 1.574813 | -2.79161 | -0.61745 |
| C  | 2.475356 | -3.60445 | 1.850701 |
| C  | 1.966143 | -4.11787 | -0.4471  |
| H  | 1.22531  | -2.40997 | -1.57462 |
| C  | 2.415533 | -4.53511 | 0.807504 |
| H  | 2.849823 | -3.89102 | 2.833572 |
| H  | 1.928726 | -4.80333 | -1.29268 |
| H  | 2.739202 | -5.56324 | 0.968593 |
| N  | 1.596101 | 2.053076 | 0.403833 |
| C  | 1.55434  | 2.949948 | -0.60235 |
| C  | 2.057531 | 2.440999 | 1.624529 |
| C  | 1.935912 | 4.278124 | -0.4251  |
| H  | 1.20731  | 2.570957 | -1.56145 |
| C  | 2.449357 | 3.755815 | 1.869856 |
| C  | 2.38252  | 4.691783 | 0.831823 |
| H  | 1.893041 | 4.967878 | -1.26684 |
| H  | 2.821797 | 4.039641 | 2.854312 |
| H  | 2.698417 | 5.721393 | 0.998774 |
| N  | 3.094393 | 0.08475  | -0.72429 |
| C  | 3.224558 | 0.088897 | -2.07072 |
| C  | 4.20195  | 0.085977 | 0.051519 |
| C  | 4.468691 | 0.094155 | -2.68927 |
| H  | 2.292322 | 0.087716 | -2.63232 |



|   |          |          |          |
|---|----------|----------|----------|
| C | 5.48248  | 0.090631 | -0.50561 |
| C | 5.618959 | 0.09497  | -1.89369 |
| H | 4.533072 | 0.097032 | -3.77639 |
| H | 6.360264 | 0.092808 | 0.14095  |
| H | 6.609243 | 0.100633 | -2.34835 |
| N | 2.512394 | 0.075912 | 1.907842 |
| C | 2.126029 | -1.17926 | 2.629863 |
| C | 3.978574 | 0.081408 | 1.545141 |
| C | 2.117246 | 1.323996 | 2.636066 |
| N | -1.53792 | 2.044299 | -0.40851 |
| C | -1.50276 | 2.935892 | 0.602571 |
| C | -2.00248 | 2.435324 | -1.62701 |
| C | -1.89422 | 4.262132 | 0.432144 |
| H | -1.15305 | 2.554464 | 1.559747 |
| C | -2.40444 | 3.748346 | -1.86529 |
| C | -2.34425 | 4.679147 | -0.82225 |
| H | -1.85674 | 4.947665 | 1.277665 |
| H | -2.77929 | 4.034541 | -2.84801 |
| H | -2.6676  | 5.707402 | -0.9833  |
| N | -3.02229 | 0.060006 | 0.709567 |
| C | -3.15246 | 0.056155 | 2.056012 |
| C | -4.13002 | 0.058794 | -0.06599 |
| C | -4.39658 | 0.051195 | 2.674667 |
| H | -2.22027 | 0.057227 | 2.61771  |
| C | -5.41047 | 0.054036 | 0.491222 |
| C | -5.54697 | 0.050118 | 1.879277 |
| H | -4.4608  | 0.048445 | 3.7618   |
| H | -6.28819 | 0.051568 | -0.15543 |
| H | -6.53724 | 0.044217 | 2.333968 |
| N | -1.52476 | -1.90883 | -0.41932 |
| C | -1.98645 | -2.29701 | -1.63983 |
| C | -1.48291 | -2.80563 | 0.586837 |
| C | -2.3783  | -3.61185 | -1.88507 |
| C | -1.86449 | -4.13383 | 0.409303 |
| H | -1.13594 | -2.42673 | 1.546041 |
| C | -2.3112  | -4.54797 | -0.84725 |
| H | -2.7507  | -3.89552 | -2.86954 |
| H | -1.82144 | -4.8233  | 1.251336 |
| H | -2.62684 | -5.57764 | -1.01389 |
| C | -3.90702 | 0.06281  | -1.55958 |
| C | -2.05468 | 1.323236 | -2.64437 |
| C | -2.04679 | -1.18013 | -2.65142 |
| N | -2.44103 | 0.068267 | -1.92249 |
| H | -4.38473 | -0.81922 | -2.00871 |
| H | -4.38969 | 0.944604 | -2.0039  |
| H | 4.456105 | 0.963329 | 1.994717 |
| H | 4.461414 | -0.80052 | 1.989093 |
| H | 1.124737 | -1.01224 | 3.048882 |
| H | 2.816962 | -1.40333 | 3.453616 |
| H | 2.806072 | 1.547914 | 3.461583 |

|   |          |          |          |
|---|----------|----------|----------|
| H | 1.117083 | 1.148612 | 3.054565 |
| H | -1.04731 | -1.00575 | -3.07183 |
| H | -2.73661 | -1.40384 | -3.47611 |
| H | -2.7455  | 1.547305 | -3.46819 |
| H | -1.05327 | 1.156462 | -3.0632  |

**Table S38.** B3LYP/6-311G\*-optimized coordinate for model (2).

|    |          |          |          |
|----|----------|----------|----------|
| Fe | -1.30476 | 0.067988 | -0.26718 |
| Fe | 1.385909 | 0.075847 | 0.252158 |
| O  | 0.255486 | 0.075417 | -1.18973 |
| O  | -0.21916 | 0.068292 | 1.166646 |
| N  | 1.69806  | -1.90776 | 0.426468 |
| C  | 2.138178 | -2.28953 | 1.647985 |
| C  | 1.637303 | -2.80738 | -0.56794 |
| C  | 2.507474 | -3.6025  | 1.906933 |
| C  | 1.991728 | -4.13583 | -0.37908 |
| H  | 1.300594 | -2.43113 | -1.52532 |
| C  | 2.43043  | -4.54145 | 0.878921 |
| H  | 2.866731 | -3.88393 | 2.890178 |
| H  | 1.940293 | -4.83167 | -1.20749 |
| H  | 2.727297 | -5.5693  | 1.054892 |
| N  | 1.684716 | 2.061883 | 0.436034 |
| C  | 1.617532 | 2.96625  | -0.55368 |
| C  | 2.123581 | 2.440103 | 1.659135 |
| C  | 1.963625 | 4.295909 | -0.35823 |
| H  | 1.282589 | 2.592726 | -1.51275 |
| C  | 2.48481  | 3.75403  | 1.924559 |
| C  | 2.400876 | 4.697748 | 0.901518 |
| H  | 1.907008 | 4.995759 | -1.18291 |
| H  | 2.843123 | 4.032668 | 2.908948 |
| H  | 2.691432 | 5.726518 | 1.082583 |
| N  | 3.134967 | 0.083993 | -0.75351 |
| C  | 3.265366 | 0.088761 | -2.09278 |
| C  | 4.232355 | 0.086602 | 0.025068 |
| C  | 4.506134 | 0.095927 | -2.70918 |
| H  | 2.336849 | 0.08663  | -2.65107 |
| C  | 5.51038  | 0.093927 | -0.52615 |
| C  | 5.649401 | 0.098583 | -1.91028 |
| H  | 4.576125 | 0.099432 | -3.78997 |
| H  | 6.383823 | 0.095953 | 0.116599 |
| H  | 6.635974 | 0.104328 | -2.35965 |
| N  | 2.568612 | 0.075758 | 1.9296   |
| C  | 2.199948 | -1.1712  | 2.657665 |
| C  | 4.02185  | 0.080306 | 1.526879 |
| C  | 2.193002 | 1.317262 | 2.663387 |
| N  | -1.62105 | 2.048797 | -0.44238 |
| C  | -1.55522 | 2.9458   | 0.554122 |
| C  | -2.06664 | 2.431672 | -1.66205 |

|   |          |          |          |
|---|----------|----------|----------|
| C | -1.91047 | 4.274441 | 0.368685 |
| H | -1.21449 | 2.566978 | 1.508817 |
| C | -2.43608 | 3.745451 | -1.91601 |
| C | -2.35432 | 4.682465 | -0.8866  |
| H | -1.85496 | 4.96855  | 1.198263 |
| H | -2.79897 | 4.028824 | -2.89735 |
| H | -2.65137 | 5.71077  | -1.05952 |
| N | -3.06875 | 0.059533 | 0.735703 |
| C | -3.19959 | 0.054962 | 2.074876 |
| C | -4.1652  | 0.057458 | -0.04351 |
| C | -4.44071 | 0.048307 | 2.69061  |
| H | -2.27082 | 0.056846 | 2.632688 |
| C | -5.44361 | 0.050775 | 0.506777 |
| C | -5.58343 | 0.046174 | 1.89092  |
| H | -4.51139 | 0.044828 | 3.771363 |
| H | -6.31668 | 0.049207 | -0.13649 |
| H | -6.57032 | 0.040939 | 2.339617 |
| N | -1.60812 | -1.9145  | -0.45271 |
| C | -2.05166 | -2.29371 | -1.67428 |
| C | -1.53587 | -2.81643 | 0.538887 |
| C | -2.4126  | -3.60849 | -1.93518 |
| C | -1.88233 | -4.14638 | 0.346371 |
| H | -1.19721 | -2.44047 | 1.49546  |
| C | -2.32414 | -4.55048 | -0.91091 |
| H | -2.77404 | -3.88895 | -2.91789 |
| H | -1.82178 | -4.84464 | 1.17211  |
| H | -2.61452 | -5.57976 | -1.08927 |
| C | -3.95396 | 0.063172 | -1.54507 |
| C | -2.13181 | 1.316057 | -2.67393 |
| C | -2.12421 | -1.17324 | -2.68028 |
| N | -2.50157 | 0.068414 | -1.94752 |
| H | -4.4445  | -0.8083  | -1.98475 |
| H | -4.44876 | 0.935438 | -1.9784  |
| H | 4.512921 | 0.951218 | 1.967059 |
| H | 4.515888 | -0.79272 | 1.959529 |
| H | 1.209886 | -1.01747 | 3.090708 |
| H | 2.898382 | -1.38861 | 3.470331 |
| H | 2.890572 | 1.535256 | 3.476636 |
| H | 1.204188 | 1.155543 | 3.096426 |
| H | -1.13573 | -1.01053 | -3.11336 |
| H | -2.82224 | -1.39378 | -3.49235 |
| H | -2.83109 | 1.536356 | -3.48499 |
| H | -1.14226 | 1.161805 | -3.10763 |

**Table S39.** Broken-symmetry BP86/TZP-optimized coordinate for model (3).

|    |          |          |          |
|----|----------|----------|----------|
| Fe | -1.32292 | 0.067251 | -0.28132 |
| Fe | 1.394878 | 0.076792 | 0.266284 |
| O  | 0.282439 | 0.075085 | -1.14223 |

|   |          |          |          |
|---|----------|----------|----------|
| O | -0.21058 | 0.068847 | 1.127129 |
| N | 1.712701 | -1.91157 | 0.459546 |
| C | 2.174455 | -2.2929  | 1.684455 |
| C | 1.662682 | -2.80595 | -0.55164 |
| C | 2.564369 | -3.60811 | 1.927815 |
| C | 2.049243 | -4.13137 | -0.36998 |
| H | 1.318053 | -2.43307 | -1.51374 |
| C | 2.50138  | -4.5419  | 0.886944 |
| H | 2.936158 | -3.89344 | 2.912569 |
| H | 2.009531 | -4.82135 | -1.21225 |
| H | 2.824859 | -5.57016 | 1.051653 |
| N | 1.697733 | 2.066454 | 0.469868 |
| C | 1.642053 | 2.965697 | -0.53672 |
| C | 2.155464 | 2.444707 | 1.697248 |
| C | 2.018506 | 4.292992 | -0.34767 |
| H | 1.301164 | 2.595392 | -1.50117 |
| C | 2.535132 | 3.761562 | 1.948011 |
| C | 2.466314 | 4.700257 | 0.911885 |
| H | 1.974288 | 4.987198 | -1.1862  |
| H | 2.90453  | 4.044412 | 2.934386 |
| H | 2.78188  | 5.73009  | 1.082244 |
| N | 3.141084 | 0.085937 | -0.71932 |
| C | 3.253416 | 0.089099 | -2.06969 |
| C | 4.256169 | 0.089648 | 0.05098  |
| C | 4.490898 | 0.095752 | -2.69949 |
| H | 2.318702 | 0.086246 | -2.62744 |
| C | 5.529141 | 0.096572 | -0.52103 |
| C | 5.64913  | 0.099861 | -1.91231 |
| H | 4.547039 | 0.098357 | -3.78724 |
| H | 6.415941 | 0.097658 | 0.113684 |
| H | 6.635372 | 0.103422 | -2.37714 |
| N | 2.592336 | 0.07698  | 1.946733 |
| C | 2.229483 | -1.17466 | 2.689887 |
| C | 4.056087 | 0.085883 | 1.547877 |
| C | 2.218789 | 1.321362 | 2.696621 |
| N | -1.64063 | 2.055592 | -0.47652 |
| C | -1.59154 | 2.950788 | 0.533994 |
| C | -2.10115 | 2.436043 | -1.70226 |
| C | -1.97744 | 4.276199 | 0.350886 |
| H | -1.2479  | 2.5787   | 1.496764 |
| C | -2.49079 | 3.751208 | -1.94695 |
| C | -2.42805 | 4.685876 | -0.90685 |
| H | -1.93829 | 4.966846 | 1.192608 |
| H | -2.8625  | 4.036204 | -2.93177 |
| H | -2.75086 | 5.714225 | -1.07276 |
| N | -3.06859 | 0.058525 | 0.705526 |
| C | -3.18094 | 0.052135 | 2.056345 |
| C | -4.18359 | 0.057209 | -0.06519 |
| C | -4.41908 | 0.048427 | 2.685051 |
| H | -2.24687 | 0.048279 | 2.616733 |

|   |          |          |          |
|---|----------|----------|----------|
| C | -5.45673 | 0.049618 | 0.506266 |
| C | -5.57706 | 0.045561 | 1.897439 |
| H | -4.47613 | 0.048031 | 3.772741 |
| H | -6.34334 | 0.048615 | -0.1288  |
| H | -6.56352 | 0.041436 | 2.361837 |
| N | -1.62676 | -1.92228 | -0.48349 |
| C | -2.08581 | -2.30149 | -1.71011 |
| C | -1.57104 | -2.82038 | 0.524099 |
| C | -2.46661 | -3.61835 | -1.95903 |
| C | -1.94807 | -4.14771 | 0.336684 |
| H | -1.22985 | -2.44896 | 1.488043 |
| C | -2.39684 | -4.55605 | -0.92216 |
| H | -2.83685 | -3.9022  | -2.94474 |
| H | -1.9038  | -4.84111 | 1.175898 |
| H | -2.7127  | -5.58597 | -1.0914  |
| C | -3.98394 | 0.062889 | -1.56227 |
| C | -2.15634 | 1.316767 | -2.70665 |
| C | -2.14961 | -1.17952 | -2.71082 |
| N | -2.52039 | 0.066386 | -1.9619  |
| H | -4.47274 | -0.81678 | -2.00439 |
| H | -4.47306 | 0.945382 | -1.99805 |
| H | 4.53901  | 0.969308 | 1.988498 |
| H | 4.550695 | -0.79298 | 1.985194 |
| H | 1.237508 | -1.01835 | 3.136756 |
| H | 2.938871 | -1.37723 | 3.50274  |
| H | 2.926553 | 1.525891 | 3.510494 |
| H | 1.22774  | 1.154154 | 3.141029 |
| H | -1.15968 | -1.01526 | -3.1592  |
| H | -2.8587  | -1.38363 | -3.52358 |
| H | -2.86573 | 1.519649 | -3.51951 |
| H | -1.16428 | 1.158837 | -3.15224 |

**Table S40.** Broken-symmetry B3LYP/6-311G\*-optimized coordinate for model (3).

|    |          |          |          |
|----|----------|----------|----------|
| Fe | -1.31419 | 0.067575 | -0.3438  |
| Fe | 1.385104 | 0.076572 | 0.329058 |
| O  | 0.202822 | 0.074607 | -1.18018 |
| O  | -0.13206 | 0.069482 | 1.165407 |
| N  | 1.696457 | -1.90259 | 0.453587 |
| C  | 2.154822 | -2.29035 | 1.67219  |
| C  | 1.641047 | -2.79113 | -0.55364 |
| C  | 2.542362 | -3.60047 | 1.912108 |
| C  | 2.019424 | -4.11503 | -0.37914 |
| H  | 1.29658  | -2.4146  | -1.50781 |
| C  | 2.472449 | -4.52894 | 0.872022 |
| H  | 2.912359 | -3.88997 | 2.889414 |
| H  | 1.976091 | -4.80194 | -1.21586 |
| H  | 2.787853 | -5.55404 | 1.033494 |
| N  | 1.681665 | 2.057495 | 0.46273  |

|   |          |          |          |
|---|----------|----------|----------|
| C | 1.619317 | 2.950464 | -0.54017 |
| C | 2.13687  | 2.44297  | 1.683251 |
| C | 1.987189 | 4.276466 | -0.35919 |
| H | 1.277869 | 2.575947 | -1.49622 |
| C | 2.514223 | 3.754886 | 1.929501 |
| C | 2.437027 | 4.687825 | 0.893957 |
| H | 1.938371 | 4.967064 | -1.19256 |
| H | 2.881918 | 4.042519 | 2.908229 |
| H | 2.744421 | 5.714558 | 1.060419 |
| N | 3.127637 | 0.085419 | -0.70821 |
| C | 3.232443 | 0.089024 | -2.05335 |
| C | 4.238009 | 0.087618 | 0.055355 |
| C | 4.46477  | 0.094901 | -2.68493 |
| H | 2.300632 | 0.086982 | -2.60566 |
| C | 5.505328 | 0.093415 | -0.51559 |
| C | 5.62139  | 0.097108 | -1.90332 |
| H | 4.518126 | 0.097701 | -3.76694 |
| H | 6.3893   | 0.095062 | 0.113039 |
| H | 6.600813 | 0.101674 | -2.36898 |
| N | 2.570599 | 0.077257 | 1.954852 |
| C | 2.213121 | -1.18169 | 2.689816 |
| C | 4.036217 | 0.083658 | 1.552092 |
| C | 2.203676 | 1.330036 | 2.695673 |
| N | -1.62451 | 2.046782 | -0.46933 |
| C | -1.56796 | 2.935579 | 0.537604 |
| C | -2.08329 | 2.434345 | -1.68769 |
| C | -1.94549 | 4.259726 | 0.3629   |
| H | -1.22327 | 2.559185 | 1.491769 |
| C | -2.47012 | 3.744712 | -1.92789 |
| C | -2.39897 | 4.673475 | -0.88818 |
| H | -1.90123 | 4.946844 | 1.199402 |
| H | -2.84043 | 4.034068 | -2.90511 |
| H | -2.71378 | 5.698706 | -1.04999 |
| N | -3.0563  | 0.058913 | 0.693691 |
| C | -3.16099 | 0.055378 | 2.039008 |
| C | -4.16689 | 0.056555 | -0.06968 |
| C | -4.39332 | 0.049443 | 2.670692 |
| H | -2.22907 | 0.057516 | 2.591124 |
| C | -5.43417 | 0.05065  | 0.50145  |
| C | -5.55001 | 0.047056 | 1.889281 |
| H | -4.4464  | 0.046731 | 3.752729 |
| H | -6.31825 | 0.048857 | -0.127   |
| H | -6.52945 | 0.042416 | 2.354889 |
| N | -1.61004 | -1.91339 | -0.47783 |
| C | -2.06591 | -2.29897 | -1.69791 |
| C | -1.54674 | -2.80626 | 0.52508  |
| C | -2.44297 | -3.6111  | -1.94395 |
| C | -1.91427 | -4.13242 | 0.344432 |
| H | -1.20497 | -2.43161 | 1.480979 |
| C | -2.3648  | -4.54395 | -0.90844 |

|   |          |          |          |
|---|----------|----------|----------|
| H | -2.8112  | -3.89881 | -2.92244 |
| H | -1.86477 | -4.82293 | 1.177836 |
| H | -2.672   | -5.57075 | -1.07481 |
| C | -3.96549 | 0.0606   | -1.5664  |
| C | -2.14269 | 1.325423 | -2.70503 |
| C | -2.13358 | -1.18613 | -2.71045 |
| N | -2.49996 | 0.066747 | -1.96966 |
| H | -4.44507 | -0.81401 | -2.00979 |
| H | -4.45125 | 0.933756 | -2.00594 |
| H | 4.51555  | 0.958439 | 1.995443 |
| H | 4.522136 | -0.78934 | 1.991806 |
| H | 1.2324   | -1.03319 | 3.145549 |
| H | 2.92975  | -1.38267 | 3.489086 |
| H | 2.918806 | 1.532763 | 3.495846 |
| H | 1.224159 | 1.171988 | 3.150793 |
| H | -1.15451 | -1.02823 | -3.16645 |
| H | -2.84936 | -1.38911 | -3.50997 |
| H | -2.85988 | 1.526544 | -3.50376 |
| H | -1.16243 | 1.176643 | -3.16153 |

**Table S41.** B3LYP/6-311G\*-optimized coordinate for model (4). The broken-symmetry structure is on the left, ferromagnetic on the right.

|    |          |          |          |    |          |          |          |
|----|----------|----------|----------|----|----------|----------|----------|
| Mn | -3.59291 | -2.80627 | 2.273314 | Mn | -3.59759 | -2.80972 | 2.27157  |
| Mn | -1.20763 | -1.34395 | 1.35386  | Mn | -1.20371 | -1.34462 | 1.347621 |
| C  | 2.623689 | 1.065886 | -0.00471 | C  | 2.622755 | 1.073564 | 0.000003 |
| C  | 1.505189 | 0.280135 | 0.365985 | C  | 1.506112 | 0.283337 | 0.366559 |
| C  | 0.347338 | 0.269933 | -0.46532 | C  | 0.351194 | 0.269209 | -0.46886 |
| C  | 0.355655 | 1.045361 | -1.63795 | C  | 0.360278 | 1.045384 | -1.64085 |
| C  | 1.462709 | 1.806961 | -1.96769 | C  | 1.465535 | 1.811463 | -1.96645 |
| C  | 2.608272 | 1.824768 | -1.15318 | C  | 2.608215 | 1.833124 | -1.14809 |
| C  | 1.581456 | -0.49924 | 1.558396 | C  | 1.581535 | -0.49624 | 1.559091 |
| N  | 0.644492 | -1.23792 | 2.076589 | N  | 0.645613 | -1.23799 | 2.074696 |
| C  | 0.92443  | -1.97059 | 3.326606 | C  | 0.924024 | -1.97019 | 3.325543 |
| C  | 0.53614  | -3.45185 | 3.22179  | C  | 0.534859 | -3.45133 | 3.221698 |
| C  | -0.97396 | -3.70512 | 3.351441 | C  | -0.97552 | -3.70339 | 3.351196 |
| C  | -1.44976 | -3.79653 | 4.816672 | C  | -1.45149 | -3.7959  | 4.816346 |
| C  | -2.91143 | -3.37951 | 5.070762 | C  | -2.91322 | -3.37853 | 5.069433 |
| N  | -3.86123 | -3.75414 | 4.009304 | N  | -3.86323 | -3.75486 | 4.008454 |
| C  | -4.88766 | -4.5     | 4.276607 | C  | -4.89    | -4.49994 | 4.276891 |
| C  | -5.98021 | -4.78759 | 3.396297 | C  | -5.98317 | -4.78825 | 3.397514 |
| C  | -6.17265 | -4.07392 | 2.171369 | C  | -6.1771  | -4.07511 | 2.172437 |
| C  | -7.32091 | -4.36236 | 1.407199 | C  | -7.32596 | -4.36413 | 1.409483 |
| C  | -8.23175 | -5.31327 | 1.82884  | C  | -8.23609 | -5.31517 | 1.832373 |
| C  | -8.04922 | -6.01742 | 3.032305 | C  | -8.05218 | -6.01879 | 3.035924 |
| C  | -6.94299 | -5.74398 | 3.804375 | C  | -6.94533 | -5.7447  | 3.806875 |
| O  | -5.34323 | -3.1426  | 1.748498 | O  | -5.34847 | -3.14336 | 1.748807 |
| O  | -3.87327 | -0.87898 | 3.149439 | O  | -3.87202 | -0.87799 | 3.14098  |

|   |          |          |          |   |          |          |          |
|---|----------|----------|----------|---|----------|----------|----------|
| C | -3.15182 | 0.153934 | 3.055202 | C | -3.14803 | 0.153075 | 3.049315 |
| C | -3.59181 | 1.405021 | 3.777805 | C | -3.5813  | 1.402631 | 3.778689 |
| O | -0.71229 | -0.46633 | -0.18881 | O | -0.70595 | -0.47248 | -0.19656 |
| O | -1.68929 | -2.67164 | 2.667294 | O | -1.69034 | -2.66937 | 2.668358 |
| O | -2.91823 | -1.97032 | 0.633614 | O | -2.917   | -1.97535 | 0.63041  |
| C | -3.71909 | -1.21992 | -0.28448 | C | -3.71822 | -1.22179 | -0.28492 |
| O | -2.05974 | 0.206918 | 2.407278 | O | -2.0579  | 0.205487 | 2.397502 |
| H | -1.21684 | -4.64307 | 2.84608  | H | -1.21833 | -4.64166 | 2.84604  |
| H | -0.52592 | 1.030642 | -2.26759 | H | -0.51903 | 1.027467 | -2.27356 |
| H | 1.442798 | 2.401983 | -2.87488 | H | 1.44639  | 2.406919 | -2.87335 |
| H | 3.465151 | 2.428197 | -1.42716 | H | 3.463701 | 2.43999  | -1.41882 |
| H | 3.500292 | 1.065199 | 0.636134 | H | 3.497247 | 1.075912 | 0.643706 |
| H | -7.47167 | -3.80588 | 0.489615 | H | -7.47777 | -3.808   | 0.49186  |
| H | -9.10823 | -5.5118  | 1.220666 | H | -9.11308 | -5.51422 | 1.225109 |
| H | -8.77628 | -6.75433 | 3.351402 | H | -8.77869 | -6.75582 | 3.355993 |
| H | -6.7954  | -6.26514 | 4.745667 | H | -6.79672 | -6.26548 | 4.748214 |
| H | -4.94337 | -4.94118 | 5.274699 | H | -4.94545 | -4.93976 | 5.275581 |
| H | 2.537184 | -0.46806 | 2.085591 | H | 2.535758 | -0.46225 | 2.088803 |
| H | -4.58562 | -1.82049 | -0.56345 | H | -4.5833  | -1.8224  | -0.56841 |
| H | -4.05969 | -0.2875  | 0.17139  | H | -4.06172 | -0.29242 | 0.175161 |
| H | -3.1187  | -0.99341 | -1.16549 | H | -3.11741 | -0.98921 | -1.16409 |
| H | -4.66498 | 1.391123 | 3.960561 | H | -4.65269 | 1.388537 | 3.971503 |
| H | -3.08015 | 1.453904 | 4.744177 | H | -3.06007 | 1.450127 | 4.739999 |
| H | -3.30791 | 2.293026 | 3.213592 | H | -3.30287 | 2.291685 | 3.21332  |
| H | -1.28902 | -4.82687 | 5.14978  | H | -1.29112 | -4.82628 | 5.149543 |
| H | -0.83057 | -3.16545 | 5.462826 | H | -0.83288 | -3.16488 | 5.463191 |
| H | 0.899781 | -3.84023 | 2.265315 | H | 0.898379 | -3.84041 | 2.26543  |
| H | 1.05752  | -4.01641 | 4.000514 | H | 1.056369 | -4.01554 | 4.000601 |
| H | -3.24808 | -3.79491 | 6.02516  | H | -3.25039 | -3.79233 | 6.02435  |
| H | -2.97397 | -2.29331 | 5.153309 | H | -2.97573 | -2.29221 | 5.150125 |
| H | 1.989983 | -1.88453 | 3.554846 | H | 1.989468 | -1.88429 | 3.554321 |
| H | 0.375012 | -1.47922 | 4.135137 | H | 0.374164 | -1.47786 | 4.13316  |
| O | -3.11706 | -4.97149 | 1.29672  | O | -3.12159 | -4.97384 | 1.295798 |
| C | -3.09753 | -5.14085 | -0.13435 | C | -3.09951 | -5.14524 | -0.13504 |
| H | -3.60129 | -5.70657 | 1.689801 | H | -3.60132 | -5.71137 | 1.689779 |
| H | -4.11215 | -5.15975 | -0.53886 | H | -4.1136  | -5.17227 | -0.54045 |
| H | -2.56965 | -4.28072 | -0.5357  | H | -2.57758 | -4.28174 | -0.53688 |
| H | -2.56985 | -6.05841 | -0.4033  | H | -2.56481 | -6.0593  | -0.40212 |

**Table S42.** BP86/6-311G\*-optimized coordinate for model (4). The broken-symmetry structure is on the left, ferromagnetic on the right.

|    |          |          |          |    |          |          |          |
|----|----------|----------|----------|----|----------|----------|----------|
| Mn | -3.59574 | -2.7654  | 2.311158 | Mn | -3.60558 | -2.77281 | 2.307748 |
| Mn | -1.20973 | -1.33402 | 1.384324 | Mn | -1.20058 | -1.33988 | 1.369308 |
| C  | 2.656708 | 1.01816  | -0.04423 | C  | 2.648985 | 1.047845 | -0.02547 |
| C  | 1.519726 | 0.261003 | 0.354843 | C  | 1.518583 | 0.274464 | 0.360678 |
| C  | 0.34054  | 0.271382 | -0.46455 | C  | 0.3487   | 0.26874  | -0.47237 |
| C  | 0.351035 | 1.03488  | -1.65436 | C  | 0.361723 | 1.032548 | -1.66171 |



|   |          |          |          |   |          |          |          |
|---|----------|----------|----------|---|----------|----------|----------|
| C | 1.478582 | 1.76931  | -2.01106 | C | 1.482637 | 1.783385 | -2.00526 |
| C | 2.641521 | 1.768018 | -1.20904 | C | 2.636064 | 1.798422 | -1.18994 |
| C | 1.592875 | -0.51138 | 1.554247 | C | 1.590934 | -0.49925 | 1.559658 |
| N | 0.634725 | -1.23597 | 2.086358 | N | 0.637557 | -1.23605 | 2.083281 |
| C | 0.920957 | -1.97355 | 3.33653  | C | 0.921333 | -1.974   | 3.334214 |
| C | 0.526495 | -3.45714 | 3.225367 | C | 0.524147 | -3.45685 | 3.223094 |
| C | -0.98825 | -3.69631 | 3.369348 | C | -0.99162 | -3.69278 | 3.366753 |
| C | -1.45439 | -3.79698 | 4.840586 | C | -1.4576  | -3.80465 | 4.837281 |
| C | -2.91641 | -3.36424 | 5.09506  | C | -2.91787 | -3.36641 | 5.092139 |
| N | -3.86242 | -3.73061 | 4.023416 | N | -3.86692 | -3.73231 | 4.022398 |
| C | -4.86983 | -4.52847 | 4.274259 | C | -4.876   | -4.52746 | 4.276278 |
| C | -5.94884 | -4.8295  | 3.378475 | C | -5.95762 | -4.82865 | 3.383809 |
| C | -6.15624 | -4.08221 | 2.162812 | C | -6.16719 | -4.08431 | 2.166585 |
| C | -7.30163 | -4.37782 | 1.382914 | C | -7.31476 | -4.3803  | 1.390215 |
| C | -8.1935  | -5.37062 | 1.775828 | C | -8.207   | -5.37084 | 1.788014 |
| C | -7.99423 | -6.10807 | 2.964788 | C | -8.00588 | -6.10535 | 2.978486 |
| C | -6.89229 | -5.82702 | 3.755742 | C | -6.90165 | -5.82378 | 3.766032 |
| O | -5.34625 | -3.11195 | 1.771307 | O | -5.35697 | -3.11562 | 1.771636 |
| O | -3.89979 | -0.83941 | 3.159113 | O | -3.89717 | -0.83128 | 3.13275  |
| C | -3.16366 | 0.197793 | 3.053814 | C | -3.15267 | 0.199762 | 3.0344   |
| C | -3.60536 | 1.459721 | 3.766358 | C | -3.57533 | 1.458514 | 3.764311 |
| O | -0.74051 | -0.4317  | -0.15815 | O | -0.72419 | -0.45259 | -0.1789  |
| O | -1.69821 | -2.62618 | 2.717799 | O | -1.70062 | -2.61456 | 2.728863 |
| O | -2.92347 | -1.9524  | 0.661287 | O | -2.91683 | -1.97183 | 0.650303 |
| C | -3.7351  | -1.16274 | -0.22354 | C | -3.72729 | -1.17799 | -0.23221 |
| O | -2.06088 | 0.245538 | 2.403321 | O | -2.05457 | 0.244119 | 2.374415 |
| H | -1.26209 | -4.6248  | 2.840469 | H | -1.26675 | -4.61767 | 2.83176  |
| H | -0.54735 | 1.036073 | -2.27613 | H | -0.52916 | 1.020544 | -2.29405 |
| H | 1.459232 | 2.358888 | -2.93264 | H | 1.465394 | 2.372957 | -2.92686 |
| H | 3.516184 | 2.351471 | -1.50515 | H | 3.505557 | 2.394614 | -1.47571 |
| H | 3.549814 | 1.002071 | 0.589342 | H | 3.535189 | 1.044075 | 0.617873 |
| H | -7.46623 | -3.79359 | 0.474138 | H | -7.48077 | -3.79819 | 0.48035  |
| H | -9.06982 | -5.57573 | 1.153483 | H | -9.08513 | -5.57639 | 1.168374 |
| H | -8.70818 | -6.87968 | 3.261574 | H | -8.7202  | -6.87514 | 3.279073 |
| H | -6.73298 | -6.37509 | 4.690517 | H | -6.74086 | -6.36967 | 4.701817 |
| H | -4.91059 | -4.99802 | 5.270653 | H | -4.91561 | -4.99461 | 5.273815 |
| H | 2.559881 | -0.49691 | 2.081393 | H | 2.553745 | -0.475   | 2.09403  |
| H | -4.59358 | -1.77035 | -0.54514 | H | -4.57866 | -1.78797 | -0.56825 |
| H | -4.10078 | -0.25672 | 0.284906 | H | -4.10486 | -0.28078 | 0.283435 |
| H | -3.1237  | -0.875   | -1.09048 | H | -3.11179 | -0.87516 | -1.09113 |
| H | -4.69409 | 1.469866 | 3.905577 | H | -4.66133 | 1.473466 | 3.922748 |
| H | -3.13464 | 1.490602 | 4.76369  | H | -3.0861  | 1.480351 | 4.752941 |
| H | -3.27432 | 2.35203  | 3.218454 | H | -3.24961 | 2.353145 | 3.216866 |
| H | -1.30307 | -4.84055 | 5.166845 | H | -1.31133 | -4.85101 | 5.15695  |
| H | -0.82016 | -3.1714  | 5.493352 | H | -0.82228 | -3.18577 | 5.495541 |
| H | 0.882348 | -3.84462 | 2.255448 | H | 0.879555 | -3.8447  | 2.253069 |
| H | 1.054476 | -4.03459 | 4.003261 | H | 1.052247 | -4.03503 | 4.000378 |
| H | -3.26496 | -3.78073 | 6.055722 | H | -3.26763 | -3.77915 | 6.053979 |
| H | -2.96966 | -2.26787 | 5.178169 | H | -2.96647 | -2.26964 | 5.172322 |
| H | 1.996943 | -1.88871 | 3.562508 | H | 1.997339 | -1.89029 | 3.560355 |

|   |          |          |          |   |          |          |          |
|---|----------|----------|----------|---|----------|----------|----------|
| H | 0.369969 | -1.48004 | 4.155674 | H | 0.370115 | -1.47943 | 4.152506 |
| O | -3.11761 | -4.94616 | 1.332011 | O | -3.1251  | -4.95447 | 1.329229 |
| C | -3.15176 | -5.10641 | -0.1082  | C | -3.15958 | -5.12065 | -0.11028 |
| H | -3.64921 | -5.66034 | 1.729031 | H | -3.64547 | -5.67452 | 1.730344 |
| H | -4.18539 | -5.06588 | -0.48756 | H | -4.19444 | -5.09681 | -0.48785 |
| H | -2.58546 | -4.26434 | -0.52027 | H | -2.60659 | -4.27149 | -0.52582 |
| H | -2.67755 | -6.05566 | -0.40384 | H | -2.6721  | -6.0639  | -0.40366 |

**Table S41.** B3LYP/6-311G\*-optimized coordinate for model (5). The broken-symmetry structure is on the left, ferromagnetic on the right.

|    |          |          |          |    |          |          |          |
|----|----------|----------|----------|----|----------|----------|----------|
| Mn | -1.37087 | -0.20927 | 0.20965  | Mn | -1.35396 | -0.27466 | 0.194054 |
| Mn | 1.30549  | -0.29509 | 0.07935  | Mn | 1.332397 | -0.26015 | 0.052369 |
| C  | 5.302448 | 0.393563 | 2.738323 | C  | 5.272146 | -0.23108 | 2.869202 |
| C  | 4.078765 | 0.835282 | 3.238608 | C  | 4.03364  | 0.076896 | 3.43131  |
| C  | 2.938038 | 0.624661 | 2.480842 | C  | 2.921658 | 0.104909 | 2.607145 |
| N  | 2.983708 | 0.002531 | 1.290429 | N  | 3.009805 | -0.14629 | 1.288388 |
| C  | 4.15317  | -0.44673 | 0.807897 | C  | 4.194757 | -0.44654 | 0.735792 |
| C  | 5.341042 | -0.25482 | 1.508351 | C  | 5.353472 | -0.49813 | 1.507711 |
| N  | 1.943577 | 1.457624 | -0.79511 | N  | 1.878957 | 1.627385 | -0.56872 |
| C  | 2.791334 | 1.324888 | -1.83317 | C  | 2.58499  | 1.680883 | -1.71529 |
| C  | 3.397404 | 2.433109 | -2.41447 | C  | 3.080397 | 2.886356 | -2.19828 |
| C  | 3.118091 | 3.699895 | -1.90992 | C  | 2.839982 | 4.053167 | -1.47665 |
| C  | 2.244615 | 3.823687 | -0.83196 | C  | 2.116039 | 3.981953 | -0.28871 |
| C  | 1.678912 | 2.67663  | -0.29572 | C  | 1.650163 | 2.746312 | 0.136764 |
| C  | 2.972985 | -0.07877 | -2.34252 | C  | 2.753324 | 0.358721 | -2.41309 |
| N  | 2.842031 | -1.08902 | -1.2538  | N  | 2.88879  | -0.73827 | -1.4135  |
| C  | 4.106494 | -1.25459 | -0.47044 | C  | 4.235131 | -0.72519 | -0.75296 |
| N  | -2.84289 | -1.26436 | -0.92929 | N  | -2.80386 | -1.14631 | -1.10172 |
| C  | -3.19853 | -2.53972 | -0.68962 | C  | -3.11368 | -2.45624 | -1.08344 |
| C  | -4.07052 | -3.23293 | -1.51653 | C  | -3.96696 | -3.02831 | -2.01516 |
| C  | -4.59482 | -2.5841  | -2.63025 | C  | -4.52066 | -2.21799 | -3.00171 |
| C  | -4.23645 | -1.26069 | -2.87041 | C  | -4.20873 | -0.86193 | -3.01322 |
| C  | -3.35494 | -0.6276  | -2.00164 | C  | -3.34377 | -0.35432 | -2.05018 |
| C  | -2.91035 | 0.802898 | -2.20925 | C  | -2.95061 | 1.105999 | -2.02036 |
| N  | -2.63205 | 1.450035 | -0.91195 | N  | -2.6588  | 1.538458 | -0.64168 |
| C  | -1.84002 | 2.70308  | -1.05135 | C  | -1.87843 | 2.804263 | -0.58644 |
| C  | -2.43716 | 3.79942  | -1.93535 | C  | -2.49679 | 4.020571 | -1.27837 |
| O  | 0.117654 | 0.508275 | 1.103598 | O  | 0.128808 | 0.333605 | 1.202634 |
| O  | -0.04382 | -0.5841  | -1.02905 | O  | -0.01581 | -0.41583 | -1.09764 |
| O  | -1.00565 | -2.09751 | 1.315938 | O  | -0.9315  | -2.30697 | 0.959725 |
| C  | 0.137976 | -2.58555 | 1.396188 | C  | 0.226863 | -2.76621 | 0.972873 |
| C  | 0.347911 | -3.93326 | 2.036969 | C  | 0.488403 | -4.18692 | 1.401688 |
| N  | -2.69154 | 0.476884 | 1.689119 | N  | -2.68502 | 0.127169 | 1.756201 |
| C  | -3.64897 | 1.366821 | 1.361568 | C  | -3.64614 | 1.059696 | 1.59641  |
| C  | -4.45412 | 1.950301 | 2.33494  | C  | -4.44399 | 1.459846 | 2.663486 |
| C  | -4.27861 | 1.594737 | 3.66797  | C  | -4.26041 | 0.873841 | 3.911425 |
| C  | -3.29181 | 0.668915 | 3.99696  | C  | -3.27351 | -0.09614 | 4.064565 |

|   |          |          |          |   |          |          |          |
|---|----------|----------|----------|---|----------|----------|----------|
| C | -2.51322 | 0.139991 | 2.980543 | C | -2.50068 | -0.43513 | 2.965924 |
| C | -3.8626  | 1.643927 | -0.11033 | C | -3.87637 | 1.587342 | 0.197363 |
| O | 1.202024 | -2.01671 | 0.936068 | O | 1.272795 | -2.09397 | 0.624833 |
| C | 2.396235 | -2.41025 | -1.83229 | C | 2.596678 | -2.07192 | -2.05383 |
| C | 3.334452 | -3.02677 | -2.86646 | C | 3.477217 | -2.44422 | -3.24449 |
| H | 0.297932 | -4.70543 | 1.262791 | H | 0.778562 | -4.78289 | 0.532082 |
| H | -0.4385  | -4.13505 | 2.762594 | H | -0.40241 | -4.62342 | 1.848633 |
| H | 1.327296 | -3.99827 | 2.508882 | H | 1.318588 | -4.22487 | 2.108492 |
| H | 1.003721 | 2.693937 | 0.550218 | H | 1.081435 | 2.613379 | 1.048549 |
| H | 4.078925 | 2.304071 | -3.24722 | H | 3.650136 | 2.909207 | -3.11996 |
| H | 2.013282 | 4.790779 | -0.40275 | H | 1.922066 | 4.865832 | 0.306394 |
| H | 3.583742 | 4.576553 | -2.34588 | H | 3.223141 | 5.003181 | -1.83178 |
| H | 2.177461 | -0.28038 | -3.06488 | H | 1.850519 | 0.152393 | -2.99367 |
| H | 3.9242   | -0.18292 | -2.87033 | H | 3.599866 | 0.383099 | -3.10339 |
| H | 2.263666 | -3.07789 | -0.98251 | H | 2.68013  | -2.81112 | -1.25829 |
| H | 1.405446 | -2.23356 | -2.25181 | H | 1.546381 | -2.03801 | -2.34585 |
| H | 4.335225 | -3.21759 | -2.47182 | H | 4.542506 | -2.46792 | -3.002   |
| H | 2.927159 | -3.99156 | -3.17656 | H | 3.206908 | -3.44889 | -3.57668 |
| H | 3.432014 | -2.42022 | -3.76927 | H | 3.336606 | -1.77946 | -4.09909 |
| H | -1.72689 | -0.57677 | 3.175098 | H | -1.71388 | -1.17473 | 3.025977 |
| H | -5.21302 | 2.669705 | 2.048932 | H | -5.20518 | 2.217021 | 2.513947 |
| H | -3.12271 | 0.364062 | 5.022224 | H | -3.09962 | -0.57948 | 5.017866 |
| H | -4.90071 | 2.036153 | 4.438461 | H | -4.87735 | 1.17171  | 4.751764 |
| H | -2.75984 | -2.99103 | 0.190343 | H | -2.65356 | -3.03574 | -0.29443 |
| H | -4.33444 | -4.25724 | -1.28395 | H | -4.19397 | -4.08581 | -1.96002 |
| H | -4.64035 | -0.72132 | -3.7196  | H | -4.63587 | -0.20033 | -3.75827 |
| H | -5.28141 | -3.09515 | -3.29578 | H | -5.1937  | -2.63175 | -3.74424 |
| H | -1.97983 | 0.806756 | -2.78533 | H | -2.03889 | 1.240928 | -2.6103  |
| H | -3.66043 | 1.343799 | -2.79631 | H | -3.73461 | 1.708177 | -2.49298 |
| H | -4.27826 | 2.645915 | -0.24543 | H | -4.29348 | 2.597164 | 0.243606 |
| H | -4.6288  | 0.950996 | -0.46873 | H | -4.64776 | 0.965162 | -0.26555 |
| H | -1.6771  | 3.081497 | -0.03865 | H | -1.70732 | 3.018036 | 0.471952 |
| H | -0.8621  | 2.409161 | -1.43756 | H | -0.90225 | 2.584926 | -1.02261 |
| H | -3.42092 | 4.132546 | -1.59781 | H | -3.47584 | 4.288128 | -0.87506 |
| H | -1.78372 | 4.674681 | -1.91399 | H | -1.84807 | 4.887452 | -1.13303 |
| H | -2.52404 | 3.490642 | -2.97899 | H | -2.60266 | 3.876797 | -2.35568 |
| H | 1.953889 | 0.944936 | 2.802279 | H | 1.925118 | 0.323424 | 2.972522 |
| H | 4.009231 | 1.335696 | 4.196471 | H | 3.930889 | 0.285026 | 4.489063 |
| H | 6.278534 | -0.61757 | 1.102179 | H | 6.303427 | -0.74717 | 1.047926 |
| H | 6.215683 | 0.54913  | 3.301543 | H | 6.162988 | -0.2674  | 3.486042 |
| H | 4.179897 | -2.30705 | -0.18738 | H | 4.719745 | -1.68977 | -0.91185 |
| H | 4.980084 | -1.03811 | -1.09125 | H | 4.878207 | 0.015428 | -1.23682 |

**Table S42.** BP86/6-311G\*-optimized coordinate for model (5). The broken-symmetry structure is on the left, ferromagnetic on the right.

|    |          |          |          |    |          |          |         |
|----|----------|----------|----------|----|----------|----------|---------|
| Mn | -1.35434 | -0.2298  | 0.222505 | Mn | -1.37153 | -0.19897 | 0.20271 |
| Mn | 1.295959 | -0.26056 | 0.047519 | Mn | 1.312324 | -0.30624 | 0.07761 |

|   |          |          |          |   |          |          |          |
|---|----------|----------|----------|---|----------|----------|----------|
| C | 5.28337  | 0.397722 | 2.711754 | C | 5.315561 | 0.411022 | 2.728985 |
| C | 4.056478 | 0.850266 | 3.214696 | C | 4.085608 | 0.857285 | 3.230555 |
| C | 2.904877 | 0.642551 | 2.457143 | C | 2.935365 | 0.636846 | 2.474785 |
| N | 2.941875 | 0.010264 | 1.262169 | N | 2.977886 | -0.00357 | 1.284624 |
| C | 4.118687 | -0.45081 | 0.776771 | C | 4.15648  | -0.45899 | 0.800178 |
| C | 5.315333 | -0.26055 | 1.47766  | C | 5.352295 | -0.25435 | 1.498957 |
| N | 1.921108 | 1.494209 | -0.76907 | N | 1.938253 | 1.449119 | -0.78206 |
| C | 2.801394 | 1.389232 | -1.79795 | C | 2.806878 | 1.32851  | -1.81703 |
| C | 3.439605 | 2.515835 | -2.32539 | C | 3.422915 | 2.450904 | -2.38006 |
| C | 3.165628 | 3.774628 | -1.77791 | C | 3.133268 | 3.718679 | -1.86296 |
| C | 2.264158 | 3.870727 | -0.7105  | C | 2.239023 | 3.829733 | -0.79059 |
| C | 1.664645 | 2.707694 | -0.22707 | C | 1.664274 | 2.670312 | -0.26994 |
| C | 2.971838 | -0.00217 | -2.34915 | C | 2.988662 | -0.07325 | -2.33942 |
| N | 2.7937   | -1.04522 | -1.28846 | N | 2.832614 | -1.09605 | -1.25697 |
| C | 4.048361 | -1.27262 | -0.49309 | C | 4.095158 | -1.28926 | -0.46532 |
| N | -2.8387  | -1.31511 | -0.86295 | N | -2.82794 | -1.25337 | -0.92189 |
| C | -3.24336 | -2.57367 | -0.57328 | C | -3.18842 | -2.53295 | -0.66315 |
| C | -4.12805 | -3.27802 | -1.39112 | C | -4.06131 | -3.24209 | -1.48892 |
| C | -4.61614 | -2.65985 | -2.54785 | C | -4.58264 | -2.60925 | -2.62275 |
| C | -4.21293 | -1.35128 | -2.83816 | C | -4.22214 | -1.28217 | -2.88225 |
| C | -3.32135 | -0.70571 | -1.97607 | C | -3.34101 | -0.62978 | -2.01444 |
| C | -2.83023 | 0.706296 | -2.21541 | C | -2.89885 | 0.802533 | -2.23239 |
| N | -2.56161 | 1.371715 | -0.91597 | N | -2.64311 | 1.453772 | -0.92874 |
| C | -1.75106 | 2.619549 | -1.0671  | C | -1.85592 | 2.715701 | -1.04932 |
| C | -2.32341 | 3.701631 | -1.9894  | C | -2.45169 | 3.813121 | -1.93895 |
| O | 0.077496 | 0.531978 | 1.090571 | O | 0.124426 | 0.509804 | 1.126572 |
| O | -0.09398 | -0.54392 | -1.05478 | O | -0.04869 | -0.59189 | -1.05279 |
| O | -1.02133 | -2.05385 | 1.329647 | O | -1.01548 | -2.09522 | 1.319723 |
| C | 0.131531 | -2.56895 | 1.372402 | C | 0.135117 | -2.59639 | 1.397043 |
| C | 0.316842 | -3.92744 | 2.006462 | C | 0.338077 | -3.94829 | 2.041527 |
| N | -2.67908 | 0.460345 | 1.690047 | N | -2.67334 | 0.491327 | 1.665359 |
| C | -3.62805 | 1.363718 | 1.337968 | C | -3.65848 | 1.368365 | 1.340723 |
| C | -4.43827 | 1.980356 | 2.297704 | C | -4.46831 | 1.945499 | 2.32519  |
| C | -4.27789 | 1.645162 | 3.646079 | C | -4.27205 | 1.600964 | 3.666162 |
| C | -3.30131 | 0.706809 | 4.001495 | C | -3.25782 | 0.692308 | 3.991847 |
| C | -2.51526 | 0.145099 | 2.996869 | C | -2.47417 | 0.167277 | 2.966512 |
| C | -3.81547 | 1.604133 | -0.14505 | C | -3.88461 | 1.630235 | -0.13431 |
| O | 1.196904 | -2.01813 | 0.884034 | O | 1.211853 | -2.03071 | 0.929908 |
| C | 2.324417 | -2.33974 | -1.91893 | C | 2.372359 | -2.4093  | -1.85481 |
| C | 3.271617 | -2.9502  | -2.95292 | C | 3.314029 | -3.02707 | -2.88947 |
| H | 0.1064   | -4.70675 | 1.254501 | H | 0.140737 | -4.73595 | 1.294718 |
| H | -0.39383 | -4.06523 | 2.832212 | H | -0.37742 | -4.08788 | 2.862989 |
| H | 1.345747 | -4.06636 | 2.361385 | H | 1.365436 | -4.07375 | 2.405796 |
| H | 0.965259 | 2.70062  | 0.611858 | H | 0.972538 | 2.670499 | 0.575868 |
| H | 4.145023 | 2.405547 | -3.15302 | H | 4.12172  | 2.330402 | -3.21186 |
| H | 2.035328 | 4.832219 | -0.24559 | H | 1.99817  | 4.799928 | -0.35056 |
| H | 3.65869  | 4.666863 | -2.17256 | H | 3.608517 | 4.607847 | -2.28556 |
| H | 2.183133 | -0.17265 | -3.10185 | H | 2.194386 | -0.26724 | -3.08035 |
| H | 3.941218 | -0.11136 | -2.86311 | H | 3.95447  | -0.18223 | -2.86016 |
| H | 2.153509 | -3.03168 | -1.08259 | H | 2.222777 | -3.08652 | -1.00246 |

|   |          |          |          |   |          |          |          |
|---|----------|----------|----------|---|----------|----------|----------|
| H | 1.337885 | -2.11822 | -2.35293 | H | 1.376701 | -2.20904 | -2.27837 |
| H | 4.26153  | -3.19352 | -2.53582 | H | 4.315546 | -3.24066 | -2.48382 |
| H | 2.838438 | -3.89586 | -3.3139  | H | 2.893289 | -3.9897  | -3.21889 |
| H | 3.415718 | -2.31013 | -3.83696 | H | 3.43029  | -2.40706 | -3.7917  |
| H | -1.73337 | -0.58551 | 3.210191 | H | -1.6639  | -0.53775 | 3.156612 |
| H | -5.19116 | 2.710536 | 1.98864  | H | -5.24962 | 2.654609 | 2.03847  |
| H | -3.14411 | 0.416112 | 5.042386 | H | -3.06982 | 0.395648 | 5.025885 |
| H | -4.90507 | 2.113142 | 4.409472 | H | -4.89972 | 2.039285 | 4.446567 |
| H | -2.82802 | -3.00017 | 0.34167  | H | -2.74789 | -2.97083 | 0.234472 |
| H | -4.43126 | -4.29086 | -1.11703 | H | -4.32914 | -4.27075 | -1.23795 |
| H | -4.59097 | -0.83071 | -3.72221 | H | -4.6254  | -0.75026 | -3.7482  |
| H | -5.31257 | -3.18297 | -3.20854 | H | -5.27098 | -3.13572 | -3.28922 |
| H | -1.87569 | 0.67247  | -2.76841 | H | -1.94824 | 0.807549 | -2.79453 |
| H | -3.5571  | 1.264529 | -2.83221 | H | -3.64743 | 1.340318 | -2.84299 |
| H | -4.21734 | 2.615258 | -0.32457 | H | -4.32956 | 2.629607 | -0.28094 |
| H | -4.58505 | 0.90119  | -0.50713 | H | -4.63853 | 0.90812  | -0.49266 |
| H | -1.6062  | 3.016425 | -0.04881 | H | -1.71171 | 3.089712 | -0.02174 |
| H | -0.76174 | 2.297652 | -1.42674 | H | -0.86069 | 2.424454 | -1.42216 |
| H | -3.31807 | 4.05619  | -1.67728 | H | -3.45142 | 4.13742  | -1.61035 |
| H | -1.65778 | 4.578672 | -1.97343 | H | -1.80412 | 4.703089 | -1.90523 |
| H | -2.39102 | 3.369964 | -3.03661 | H | -2.52162 | 3.506021 | -2.99365 |
| H | 1.914183 | 0.97154  | 2.781408 | H | 1.941256 | 0.961149 | 2.793719 |
| H | 3.991046 | 1.359345 | 4.17866  | H | 4.017215 | 1.372084 | 4.191246 |
| H | 6.25756  | -0.63351 | 1.067163 | H | 6.297334 | -0.62221 | 1.09031  |
| H | 6.206416 | 0.552781 | 3.276493 | H | 6.237859 | 0.576856 | 3.291936 |
| H | 4.053006 | -2.33426 | -0.19572 | H | 4.128489 | -2.3489  | -0.16254 |
| H | 4.945996 | -1.1144  | -1.11422 | H | 4.985299 | -1.11308 | -1.09245 |

**Citation 1.** Full citation for Gaussian 03 Revision E.01

Frisch, M. J.; Trucks, G. W.; Schlegel, H. B.; Scuseria, G. E.; Robb, M. A.; Cheeseman, J. R.; Jr., J. A. M.; Vreven, T.; Kudin, K. N.; Burant, J. C.; Millam, J. M.; Iyengar, S. S.; Tomasi, J.; Barone, V.; Mennucci, B.; Cossi, M.; Scalmani, G.; Rega, N.; Petersson, G. A.; Nakatsuji, H.; Hada, M.; Ehara, M.; Toyota, K.; Fukuda, R.; Hasegawa, J.; Ishida, M.; Nakajima, T.; Honda, Y.; Kitao, O.; Nakai, H.; Klene, M.; Li, X.; Knox, J. E.; Hratchian, H. P.; Cross, J. B.; Adamo, C.; Jaramillo, J.; Gomperts, R.; Stratmann, R. E.; Yazyev, O.; Austin, A. J.; Cammi, R.; Pomelli, C.; Ochterski, J. W.; Ayala, P. Y.; Morokuma, K.; Voth, G. A.; Salvador, P.; Dannenberg, J. J.; Zakrzewski, V. G.; Dapprich, S.; Daniels, A. D.; M. C. Strain; Farkas, O.; Malick, D. K.; Rabuck, A. D.; Raghavachari, K.; Foresman, J. B.; Ortiz,

J. V.; Cui, Q.; Baboul, A. G.; Clifford, S.; Cioslowski, J.; Stefanov, B. B.; Liu, G.; Liashenko, A.; Piskorz, P.; Komaromi, I.; Martin, R. L.; Fox, D. J.; Keith, T.; Al-Laham, M. A.; Peng, C. Y.; Nanayakkara, A.; Challacombe, M.; Gill, P. M. W.; Johnson, B.; Chen, W.; Wong, M. W.; Gonzalez, C.; Pople, J. A. *Gaussian 03, Revision E.01*, Gaussian, Inc.: Pittsburgh PA, 2003.
